# Supplementary material for: Prognostic factors for severity and mortality in patients infected with COVID-19: A systematic review
Source: PLOS journal article supplement (doi:10.1371/journal.pone.0241955), 2020-11-17

## Forest plot comparison graphics: Risk of severe Covid-19 disease

### Glossary

ADJ=0: crude estimate

ADJ=1: adjust estimate

LRB=0: moderate and high risk of bias

LRB=1: low risk of bias

MRB=0: High risk of bias

MRB=1: moderate and low risk of bias

ALT: Alanine aminotransferase

APTT: activated partial thromboplastin time

APACHE: Acute Physiology and Chronic Health Evaluation II

AST: Aspartate aminotransferase

BUN: Blood urea nitrogen

PT: prothrombin time

SOFA: The sequential organ failure assessment score

Candidate variable: Age (older than 50 - 65 years), outcome: severe Covid-19 disease, subgroup analysis by risk of bias (high vs moderate/low)

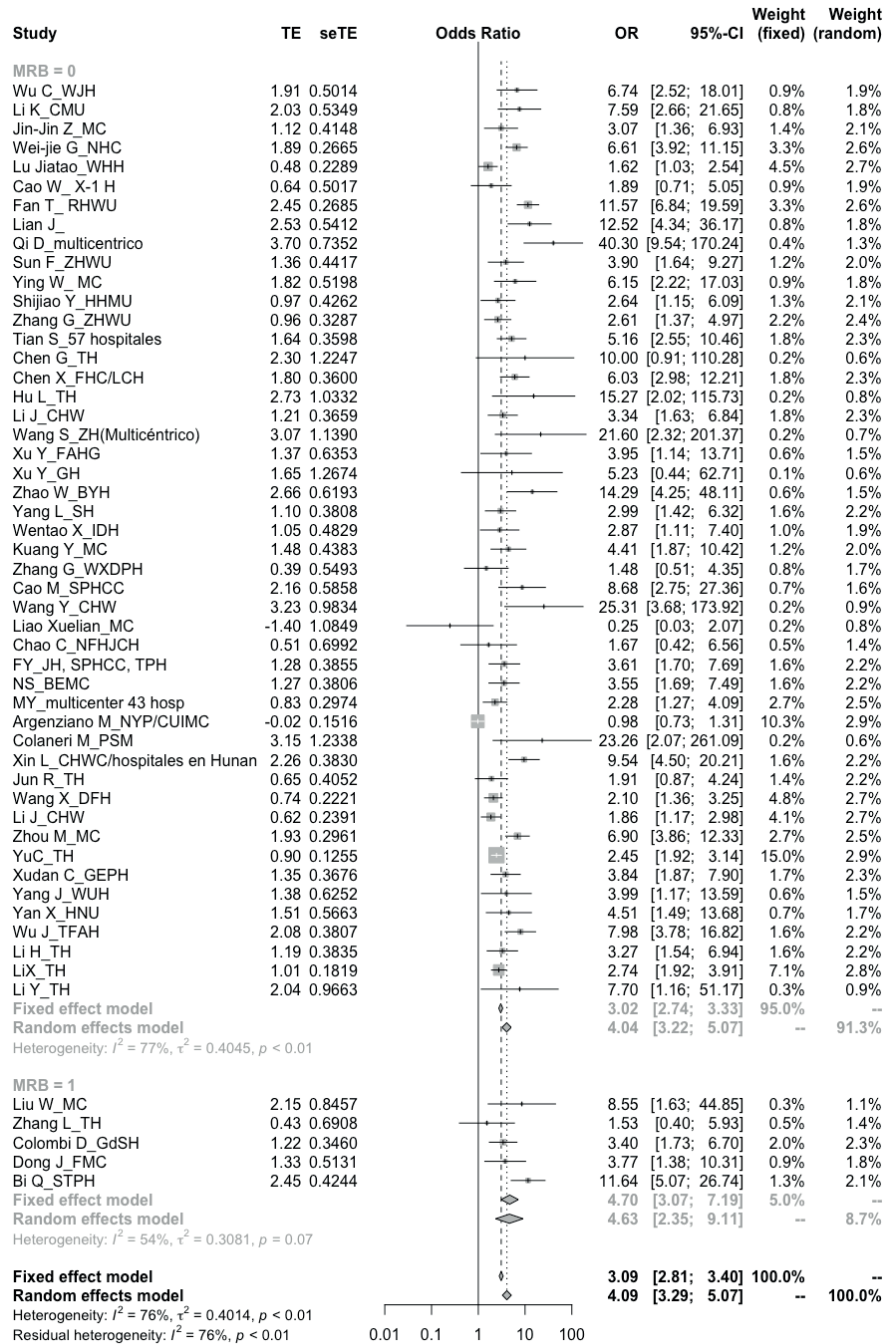

Candidate variable: Age increase (per 1 year), outcome: severe Covid-19 disease, subgroup analysis by risk of bias (high vs moderate/low)

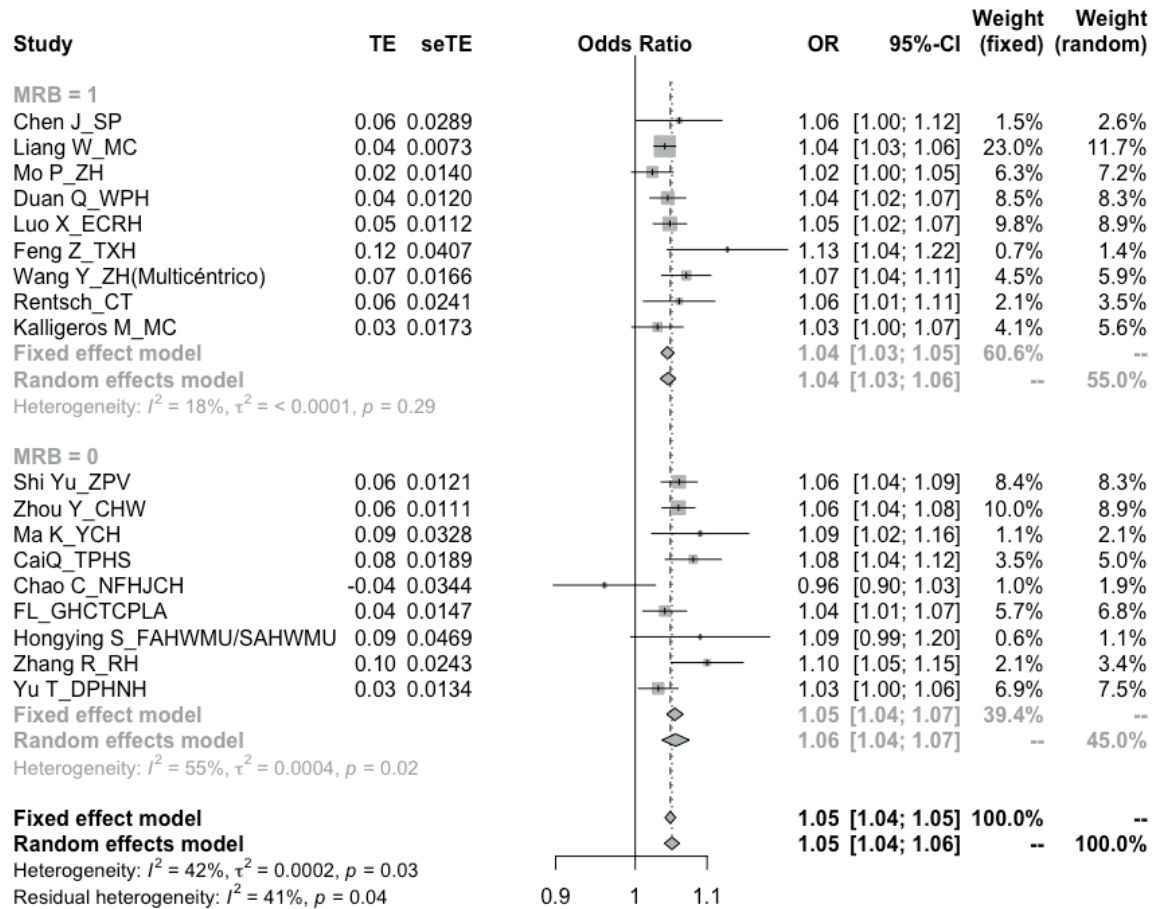

Candidate variable: Male gender, outcome: severe Covid-19 disease, subgroup analysis by risk of bias (high vs moderate/low)

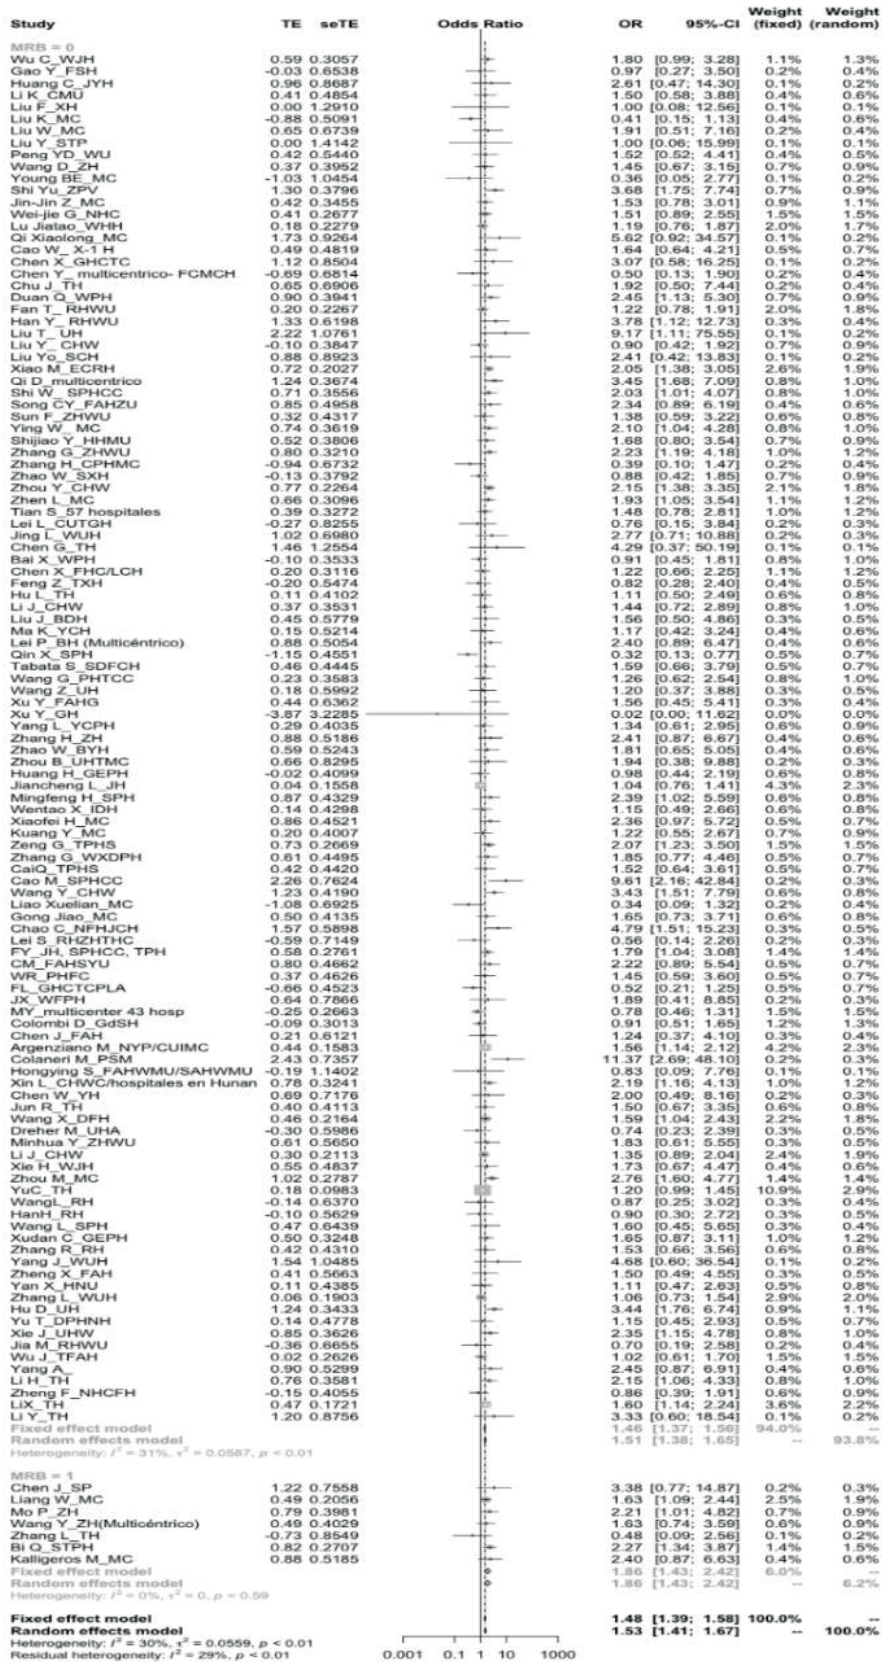



Candidate variable: Smoking (Active, present smoker), outcome: severe Covid-19 disease, subgroup analysis by risk of bias (high vs moderate/low)

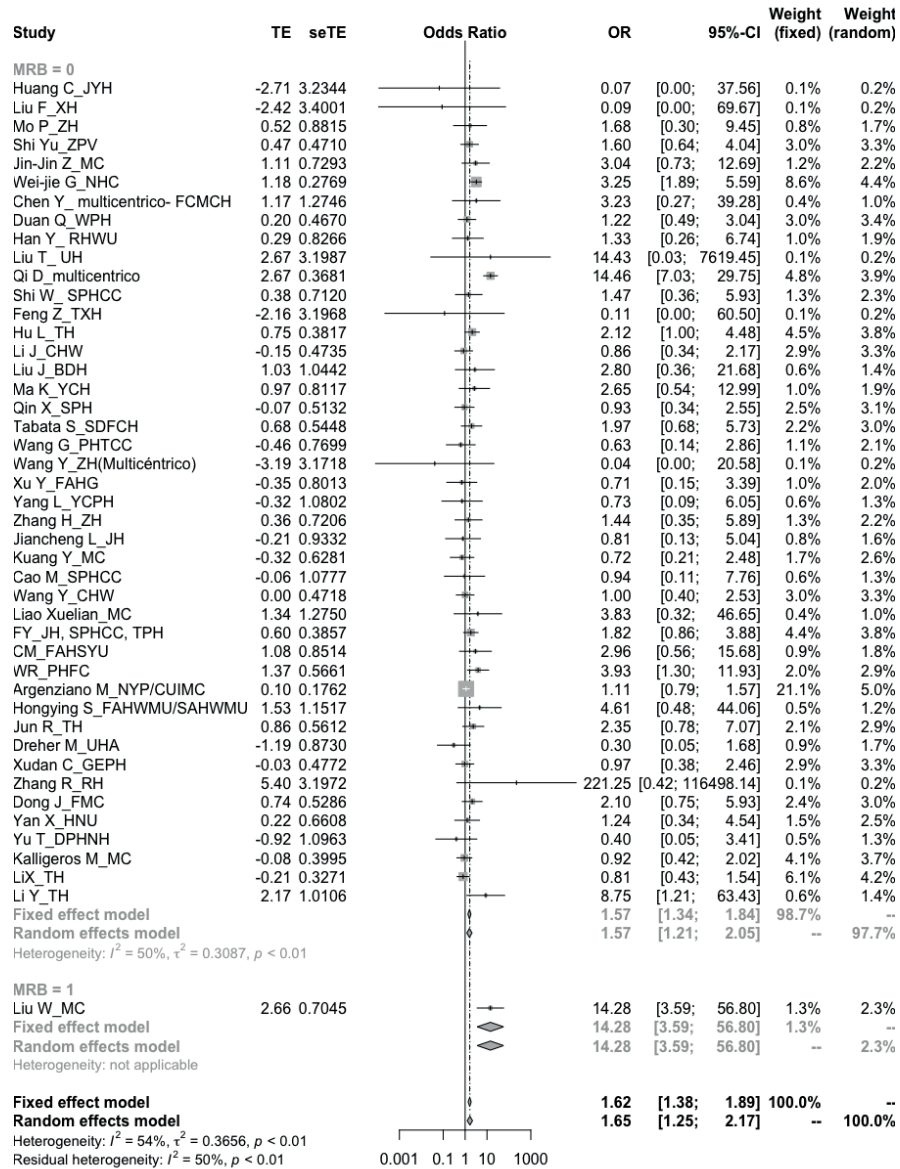

Candidate variable: Cardiovascular disease (coronary heart disease or congestive heart failure), outcome: severe Covid-19 disease, subgroup analysis by risk of bias (high vs moderate/low)

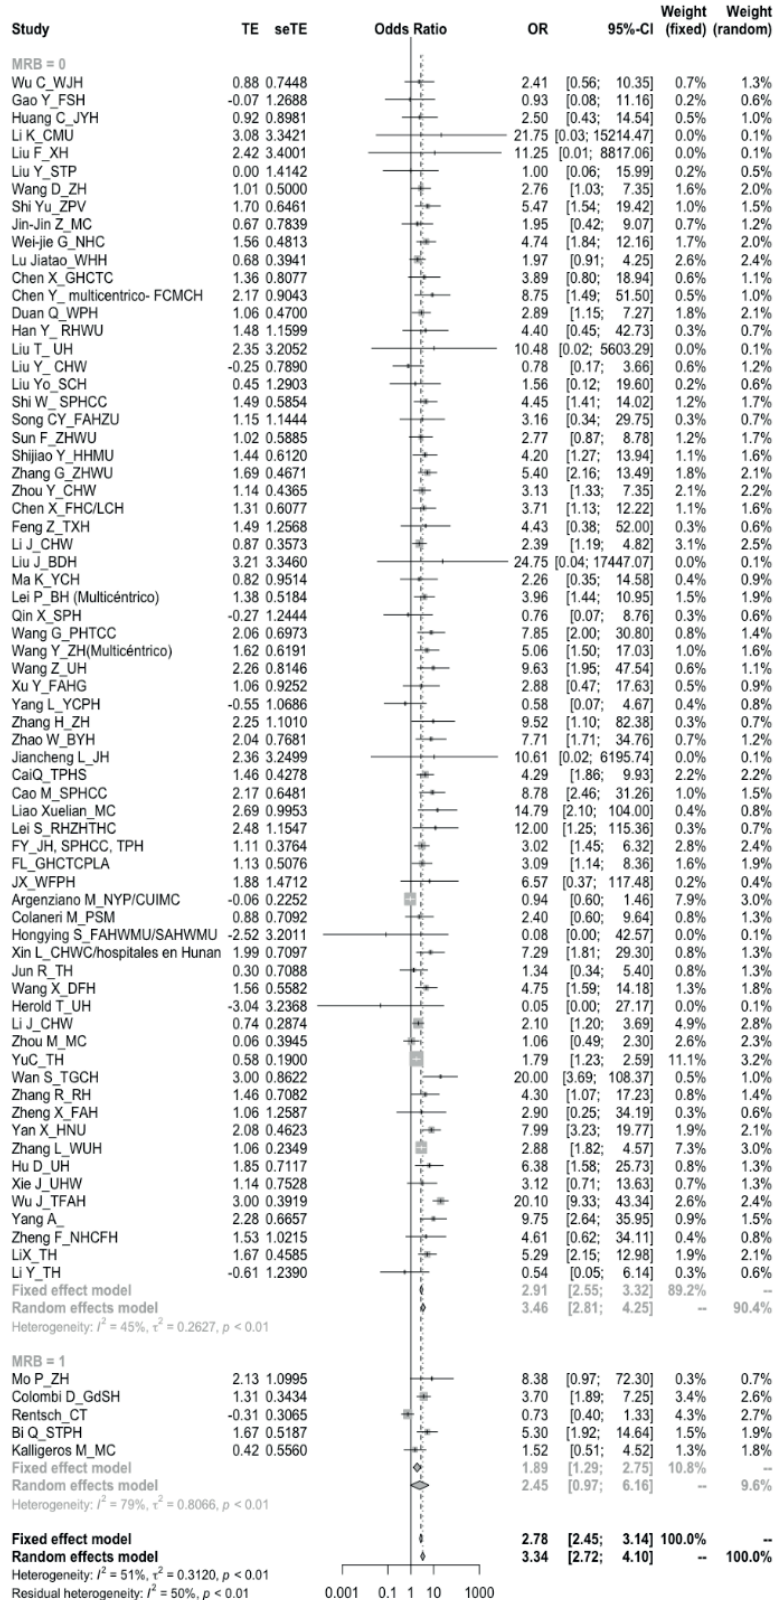

Candidate variable: Cardiac arrhythmia (as previous condition or new clinical finding), outcome: severe Covid-19 disease

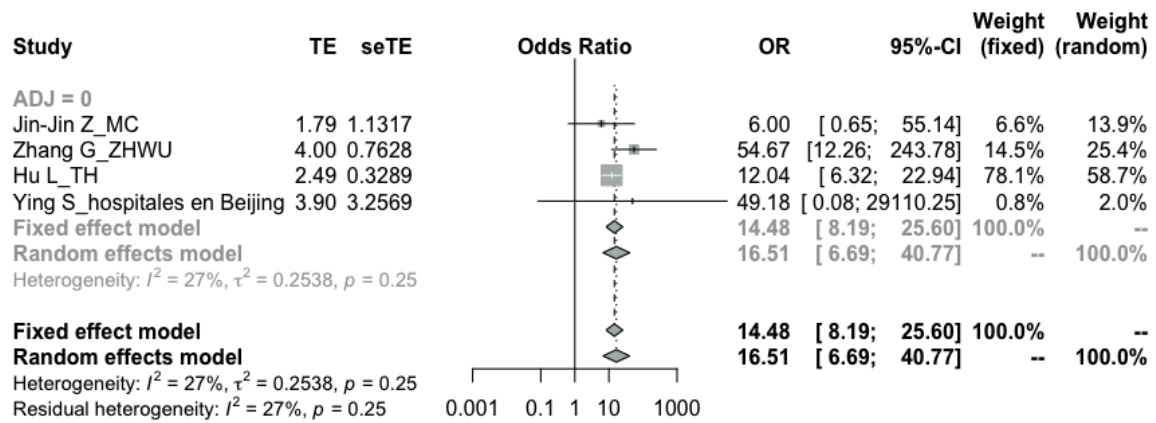

Candidate variable: Cerebrovascular disease (History of stroke or CNS disease), outcome: severe Covid-19 disease, subgroup analysis: (crude vs adjusted)

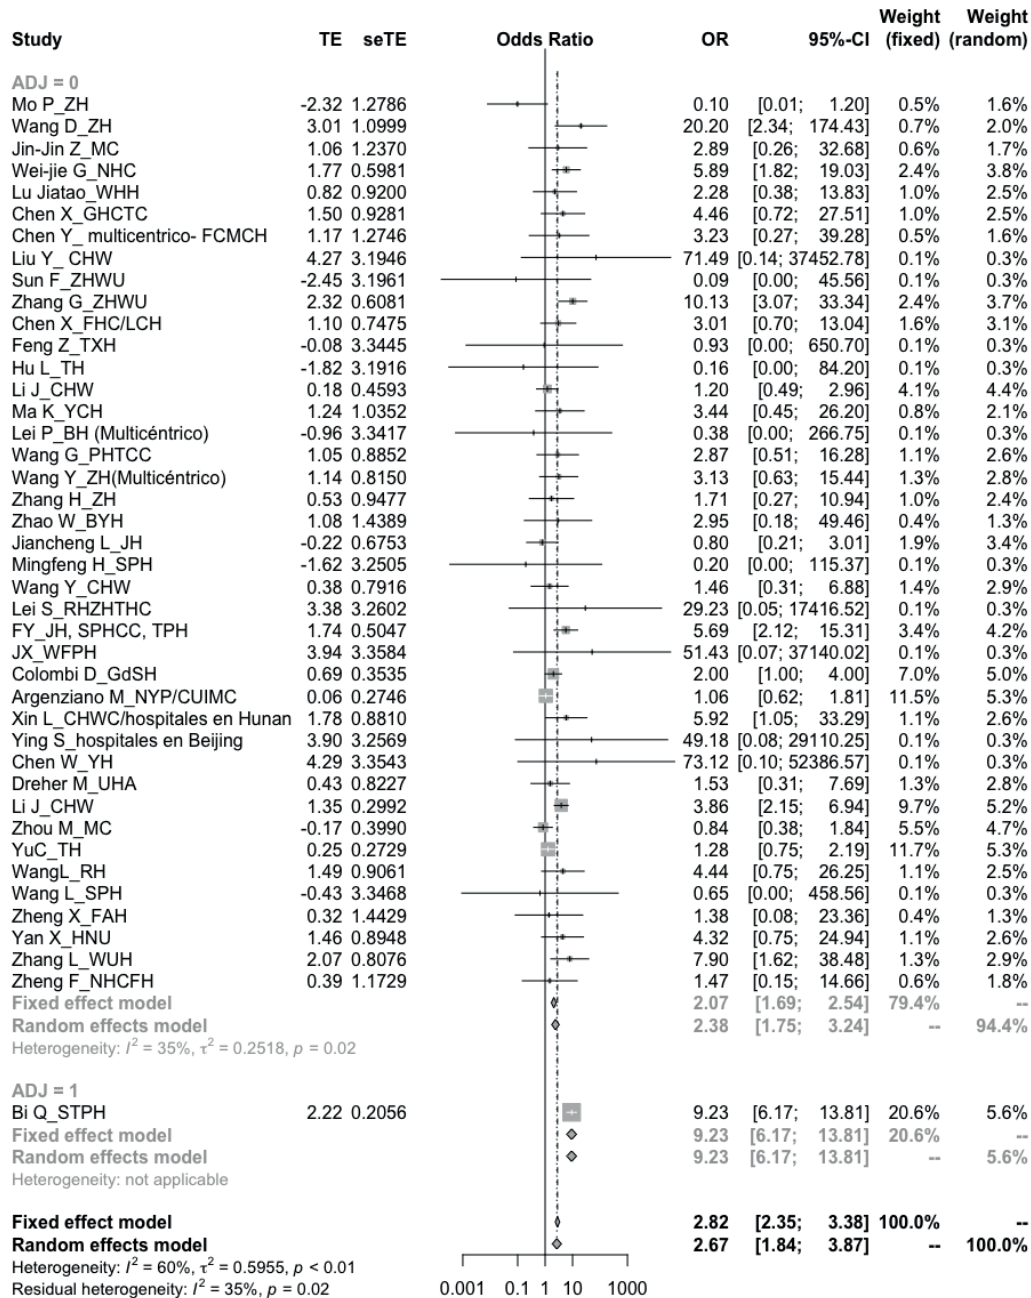

Candidate variable: Diabetes, outcome: severe Covid-19 disease, subgroup analysis by risk of bias (high vs moderate/low)

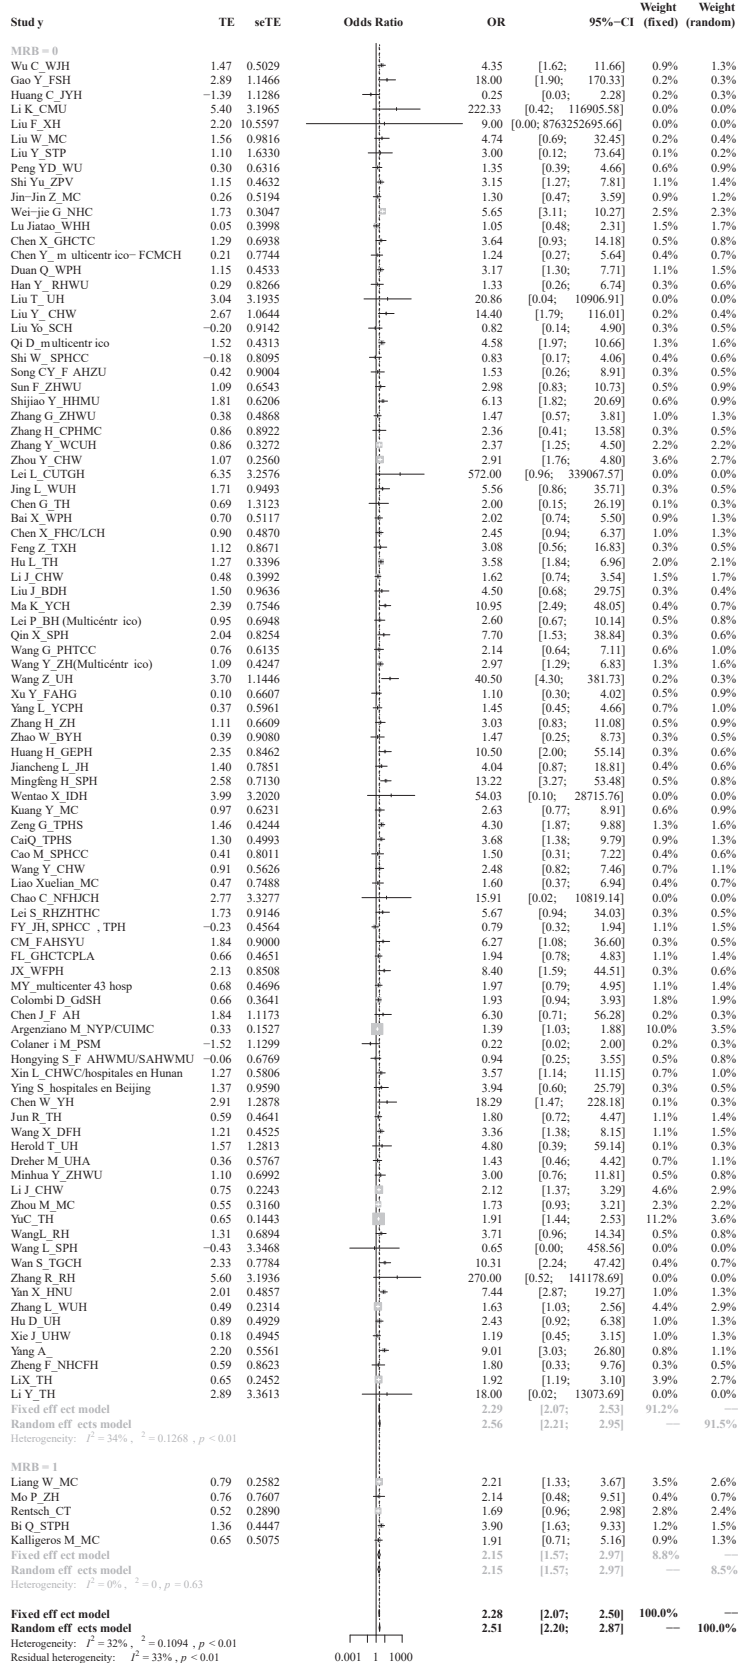



Candidate variable: Arterial hypertension, outcome: severe Covid-19 disease, subgroup analysis by risk of bias (high vs moderate/low)

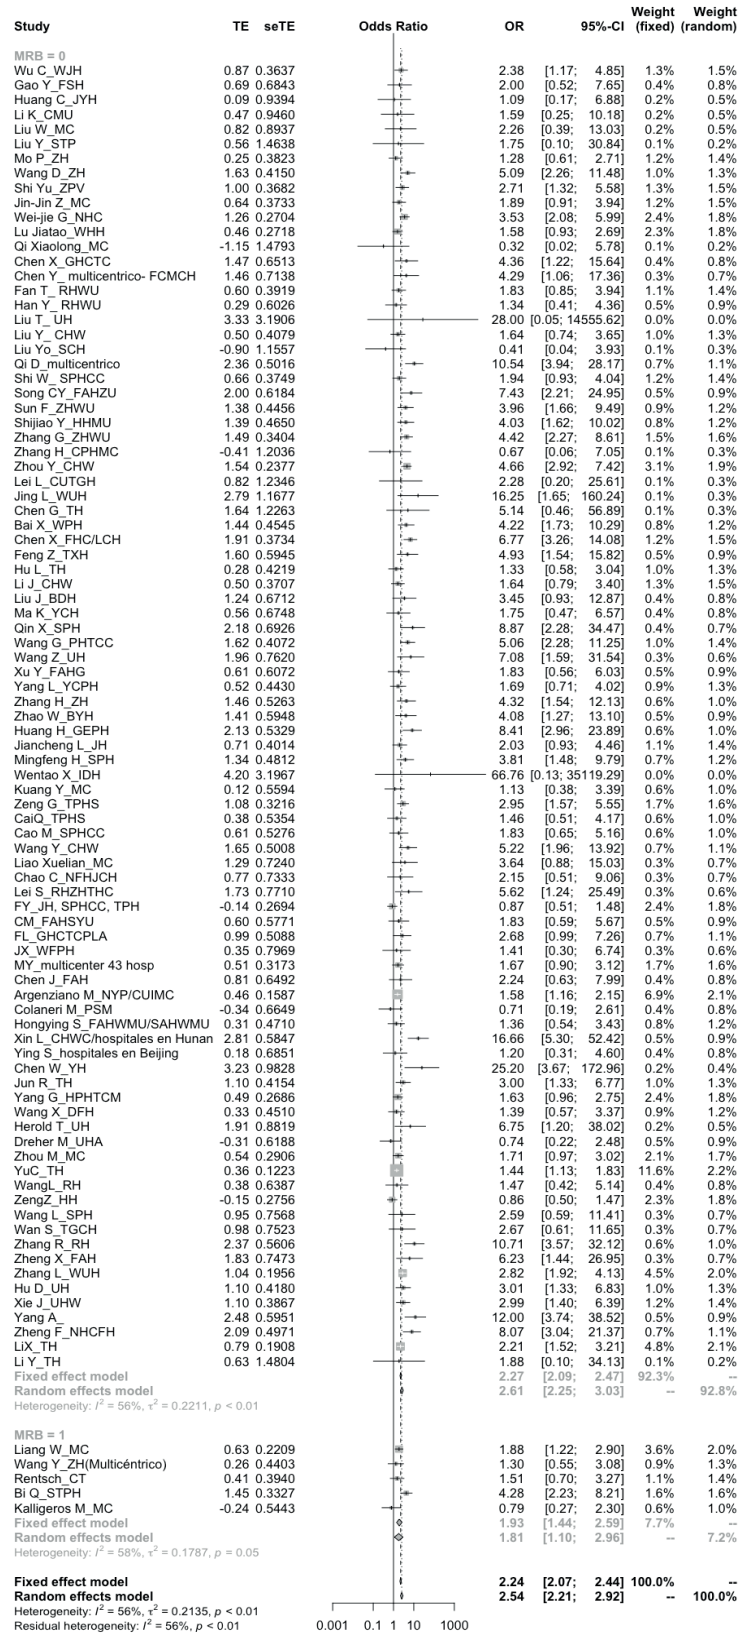

Candidate variable: Obesity, outcome: severe Covid-19 disease, subgroup analysis: (crude vs adjusted)

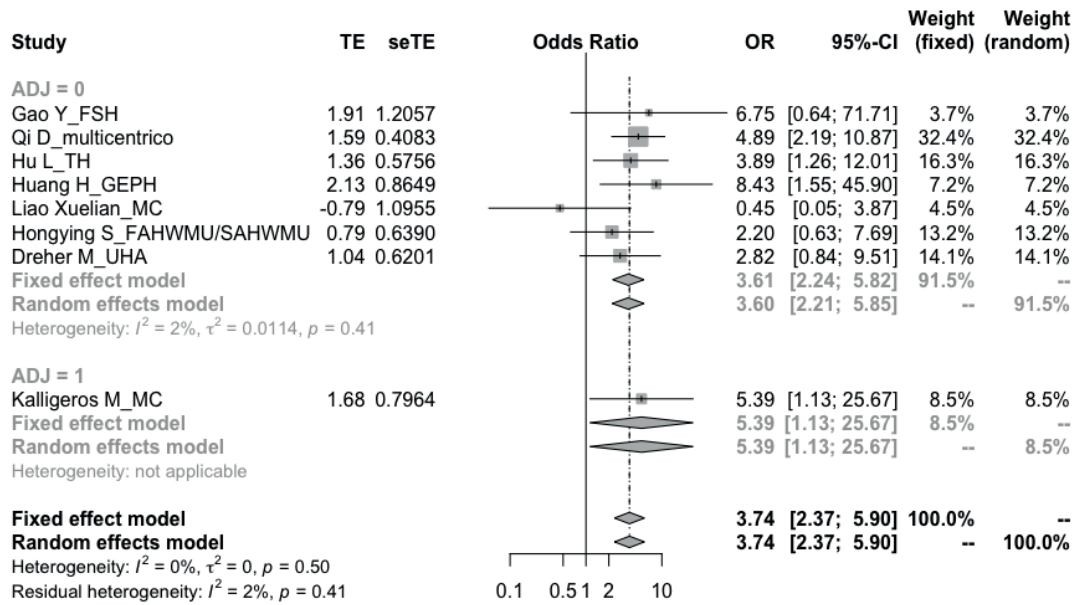

Candidate variable: Chronic kidney disease, outcome: severe Covid-19 disease, subgroup analysis by risk of bias (high vs moderate/low)

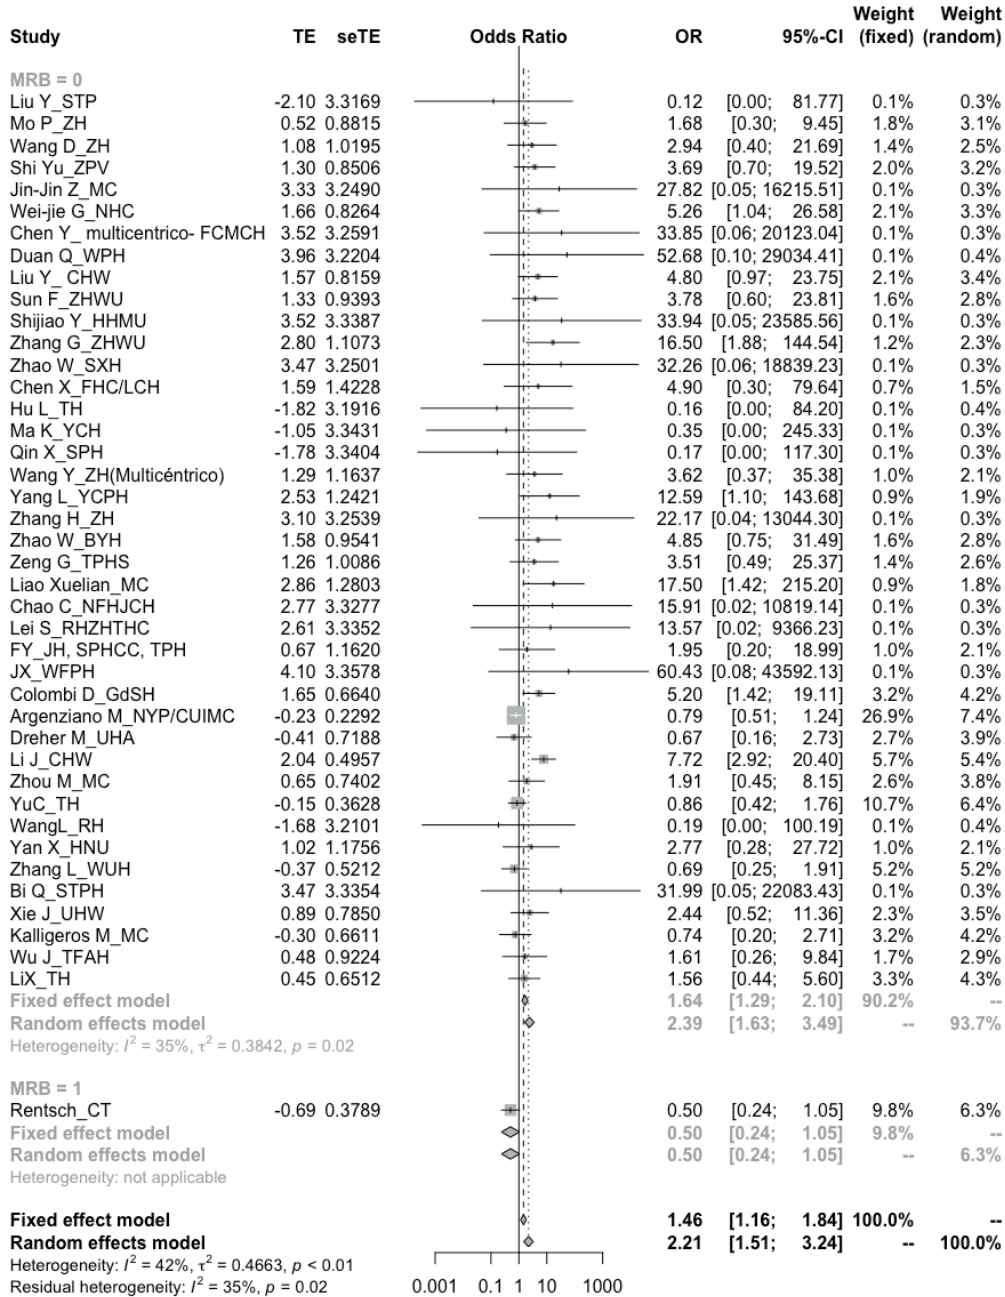

Candidate variable: Asthma, outcome: severe Covid-19 disease

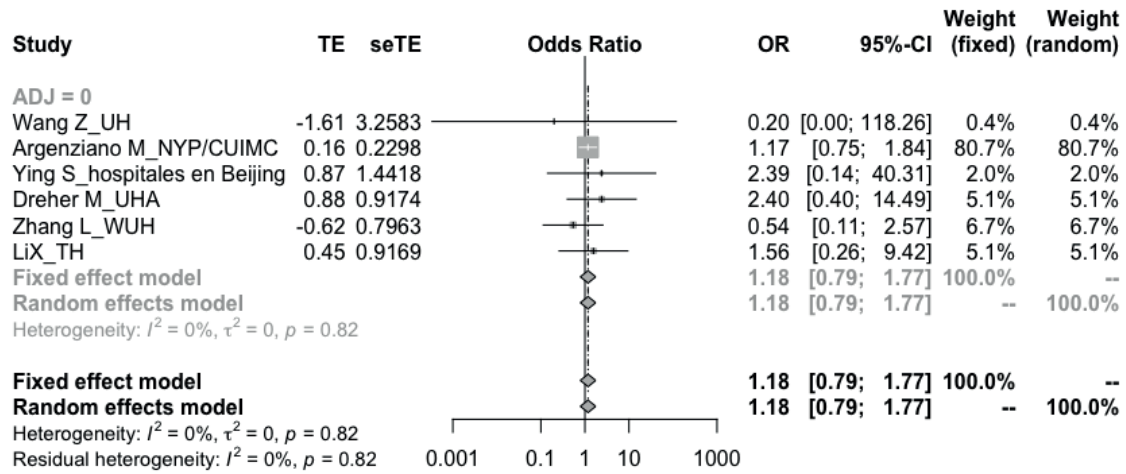

Candidate variable: COPD, outcome: severe Covid-19 disease, subgroup analysis by risk of bias (high vs moderate/low)

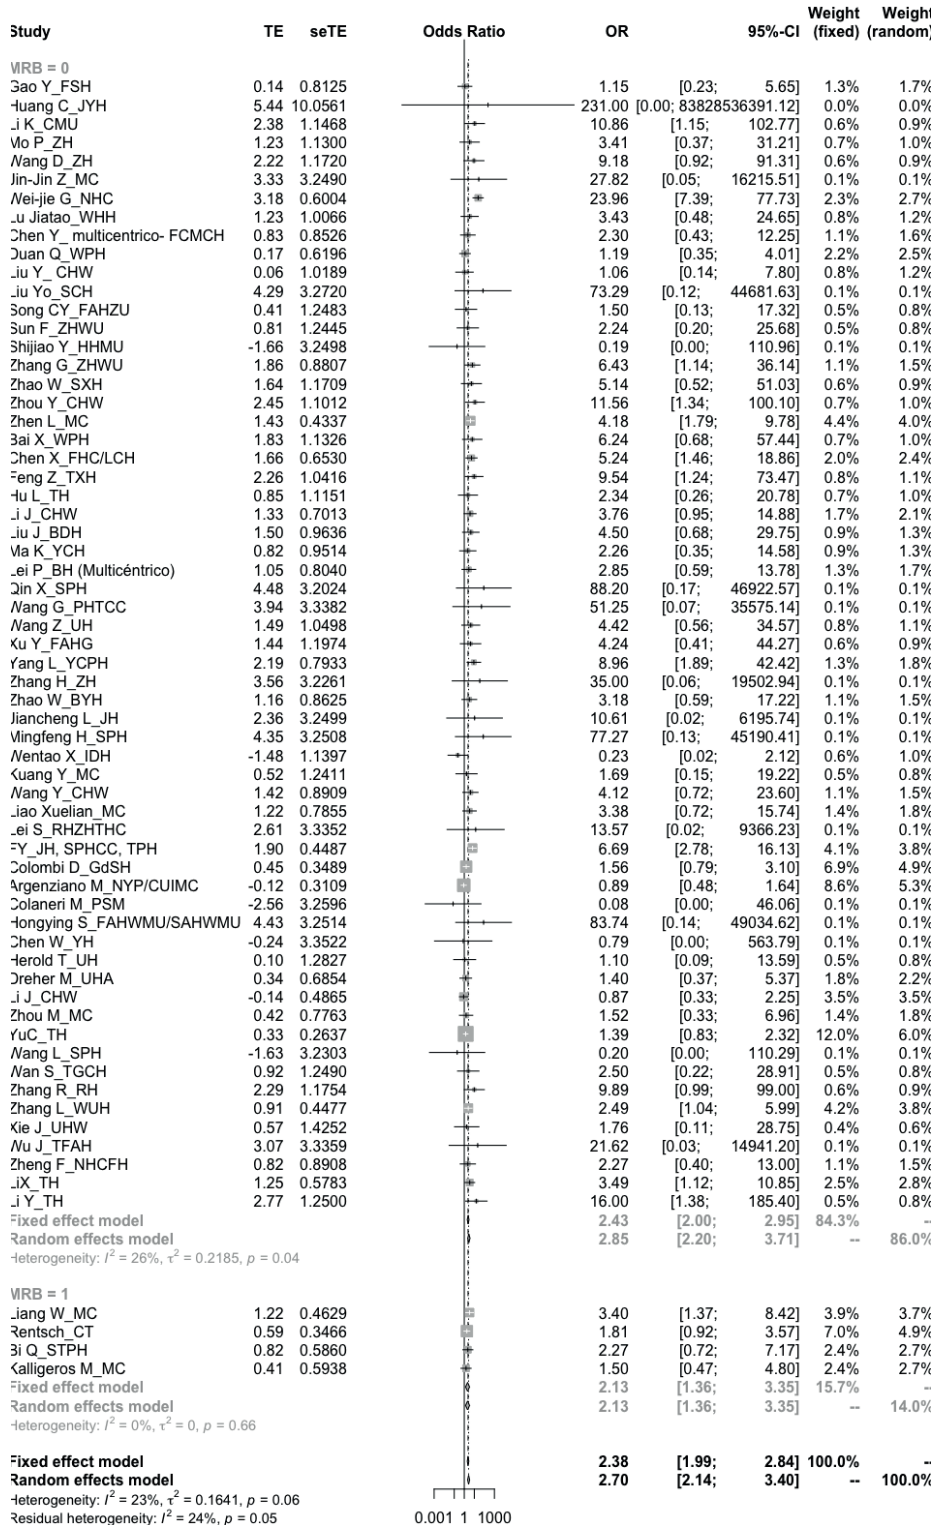



Candidate variable: Tuberculosis, outcome: severe Covid-19 disease

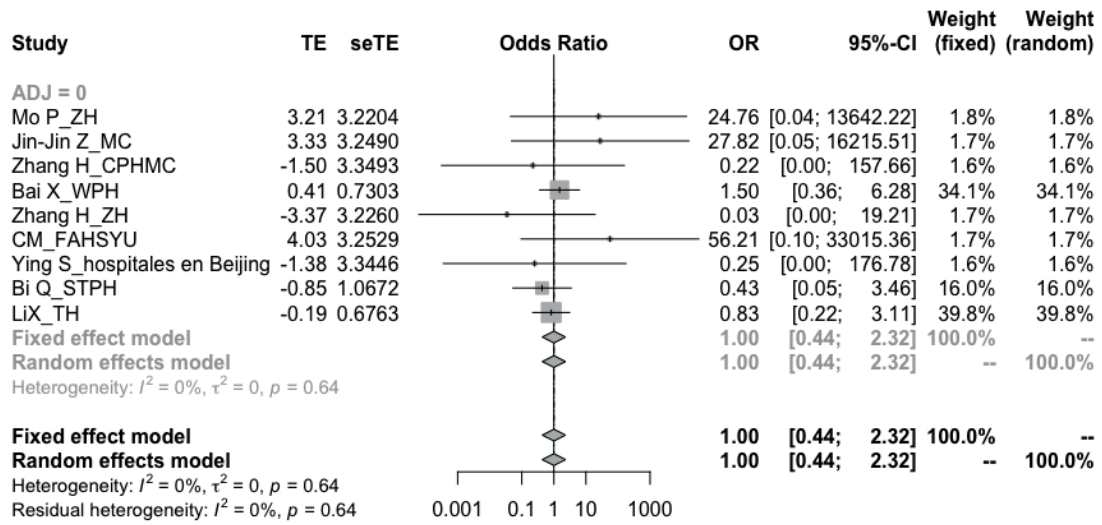

Candidate variable: Cancer (solid or active haematologic cancer), outcome: severe Covid-19 disease, subgroup analysis by risk of bias (high vs moderate/low)

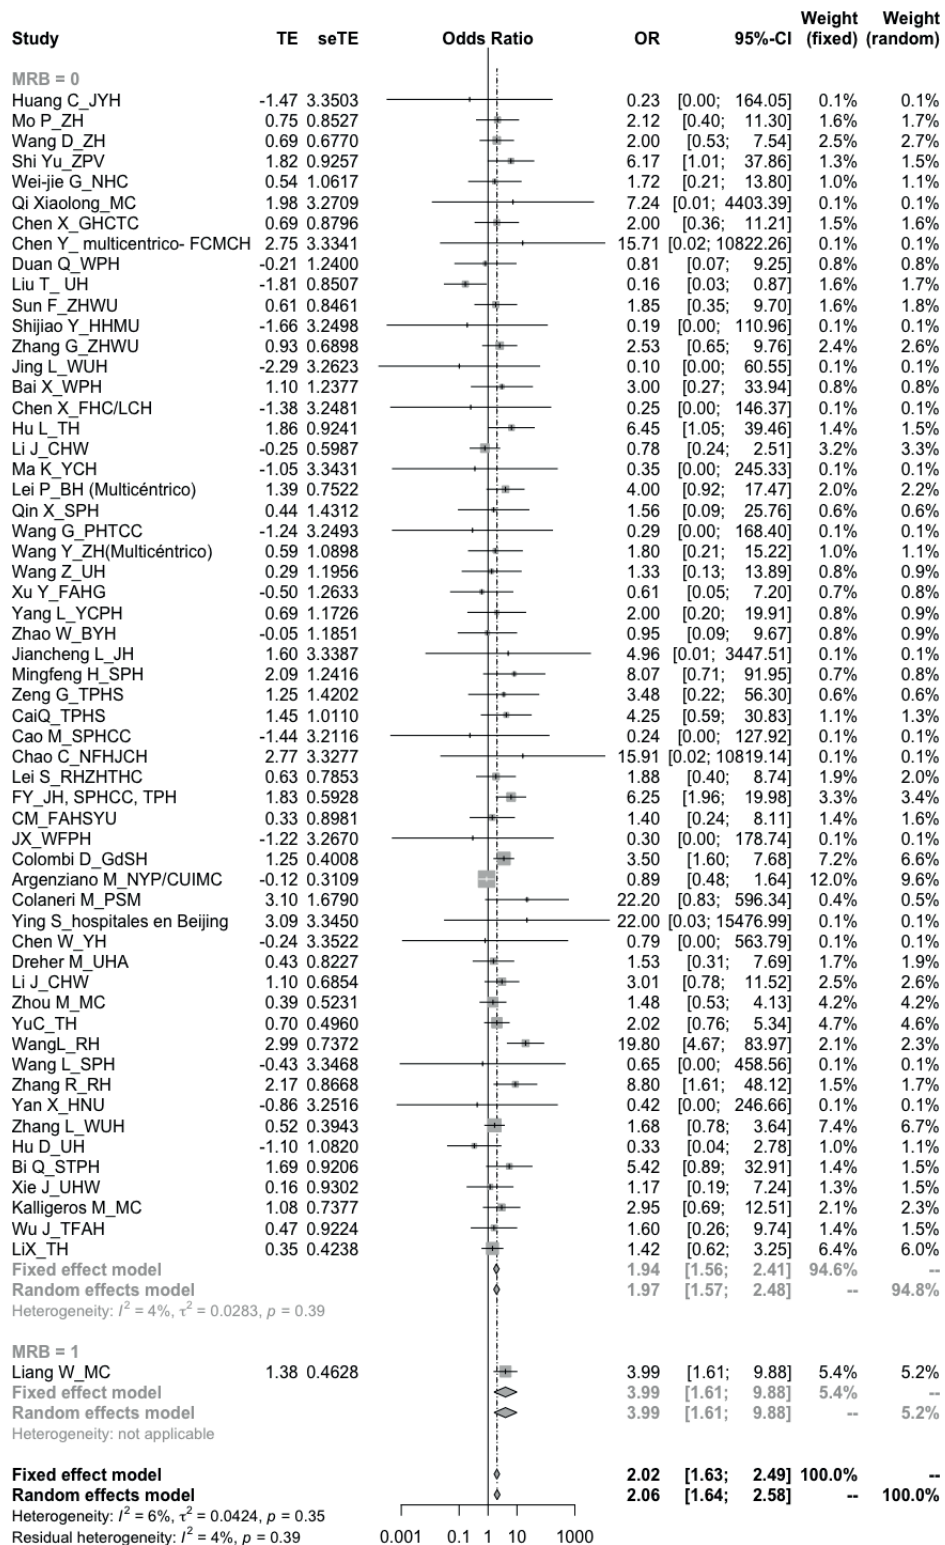

Candidate variable: HIV infection, outcome: severe Covid-19 disease

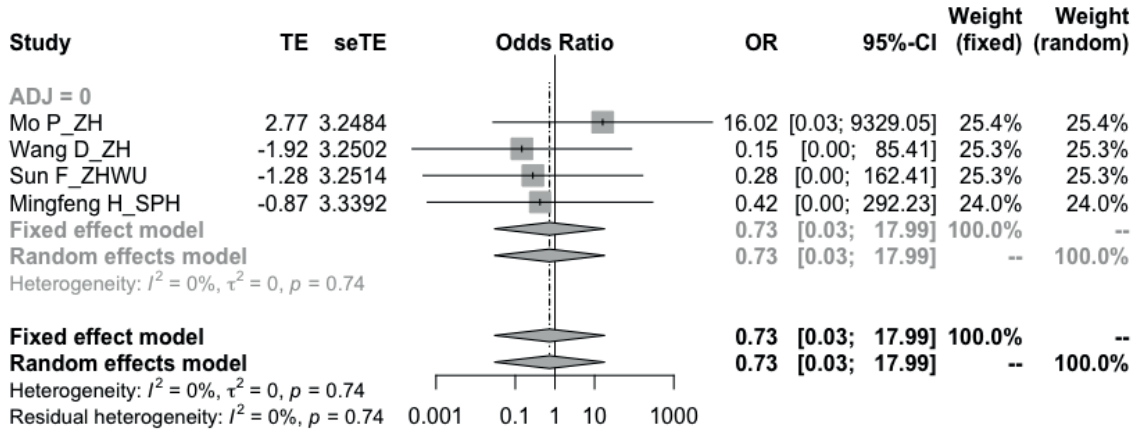

Candidate variable: Immunocompromised, outcome: severe Covid-19 disease

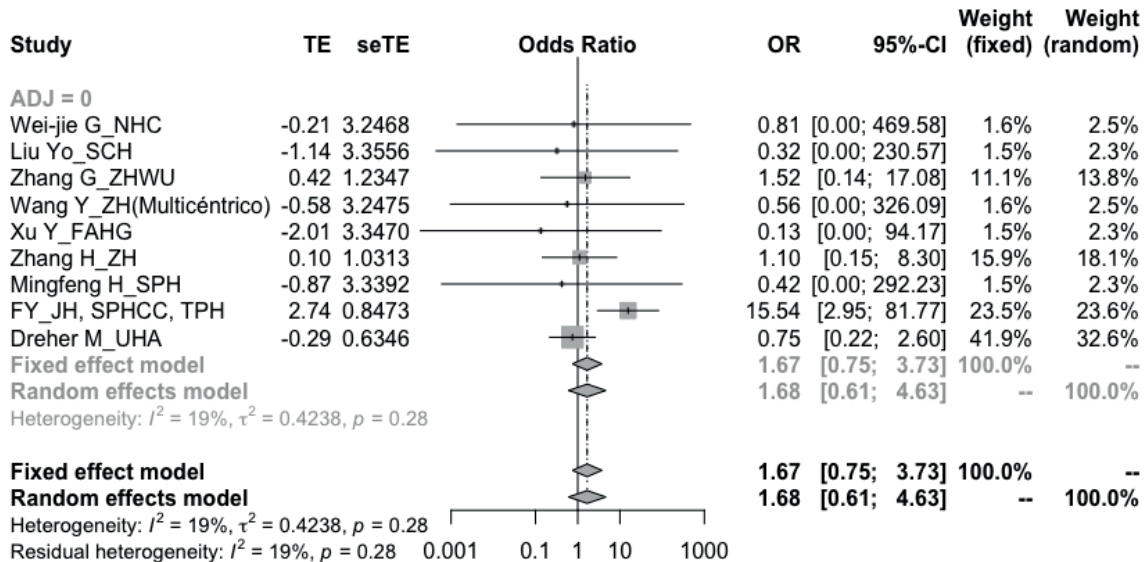

Candidate variable: Autoimmune disease, outcome: severe Covid-19 disease

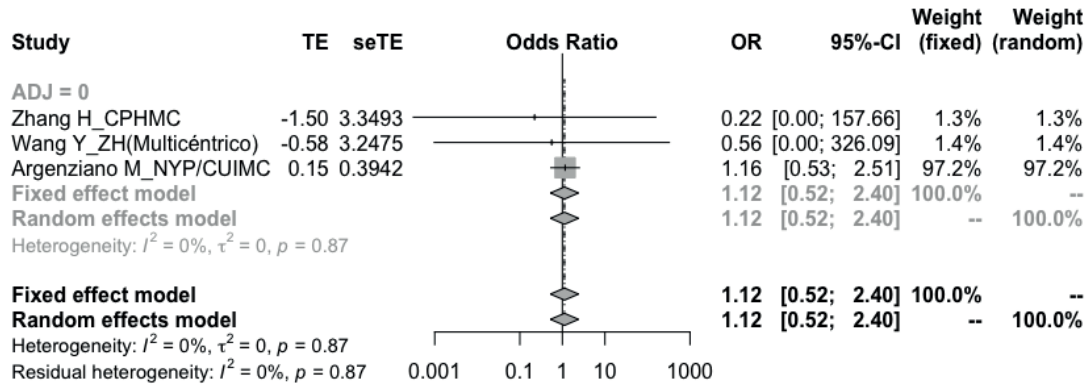

Candidate variable: Chronic liver disease, outcome: severe Covid-19 disease

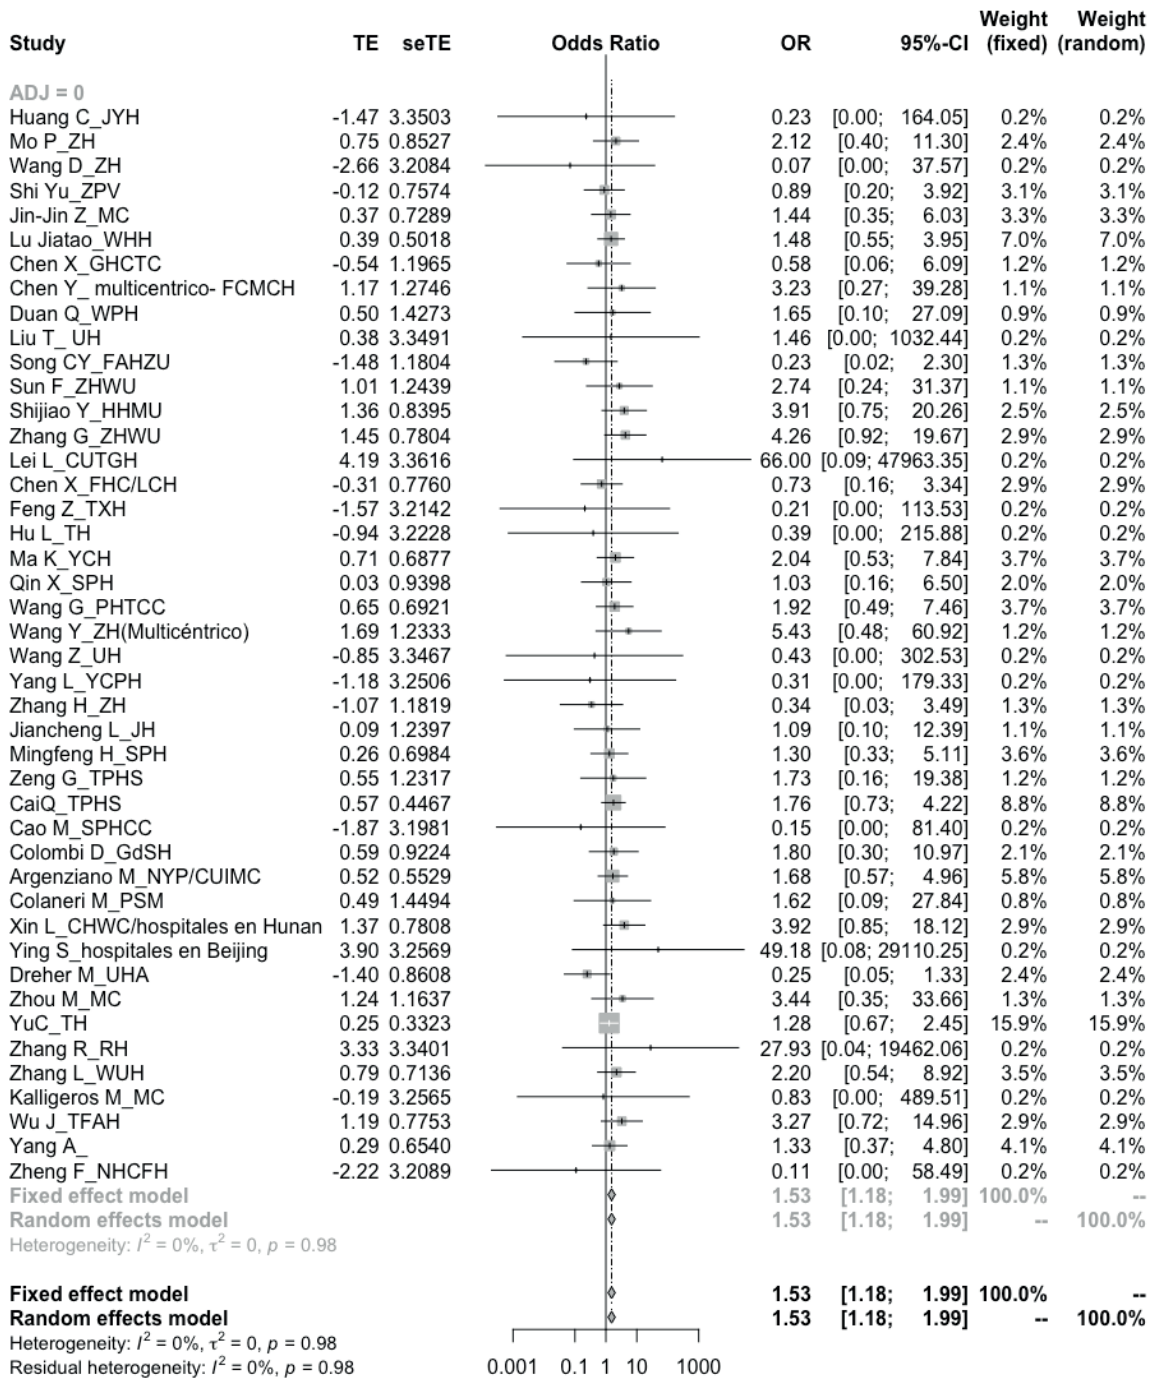



Candidate variable: Thyroid disease, outcome: severe Covid-19 disease

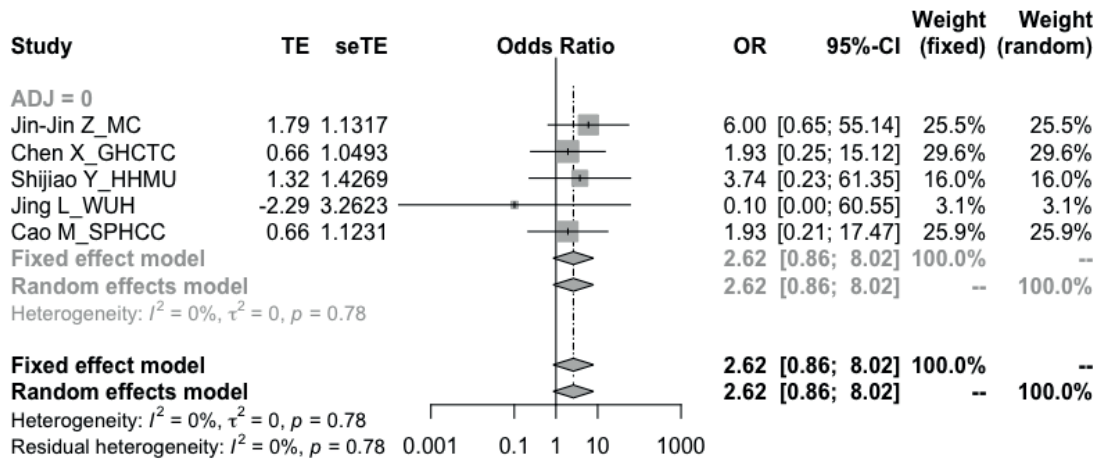

Candidate variable: Chronic gastric disease: History of peptic ulcer or gastritis, outcome: severe Covid-19 disease

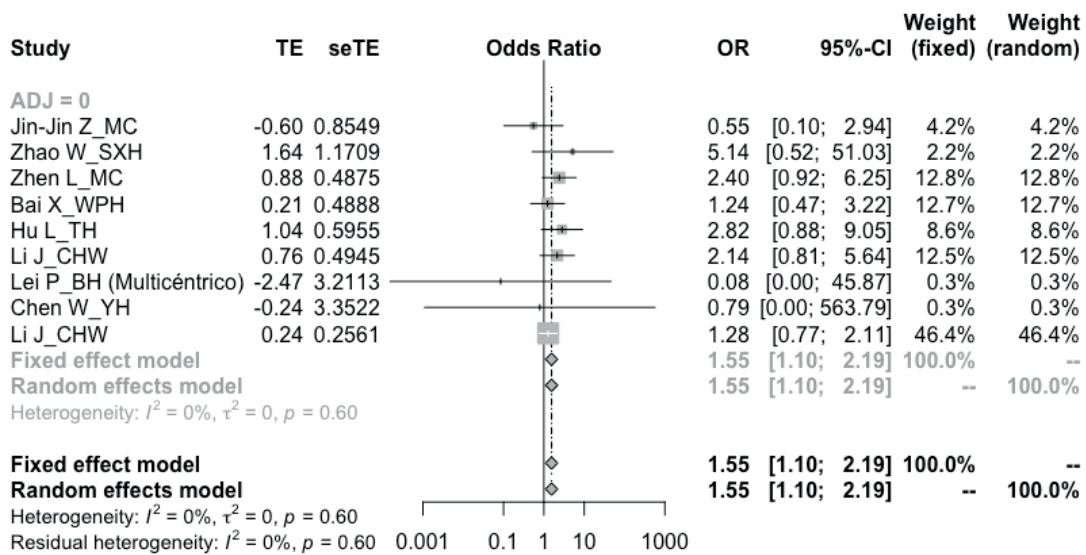

Candidate variable: Dyslipidemia, outcome: severe Covid-19 disease

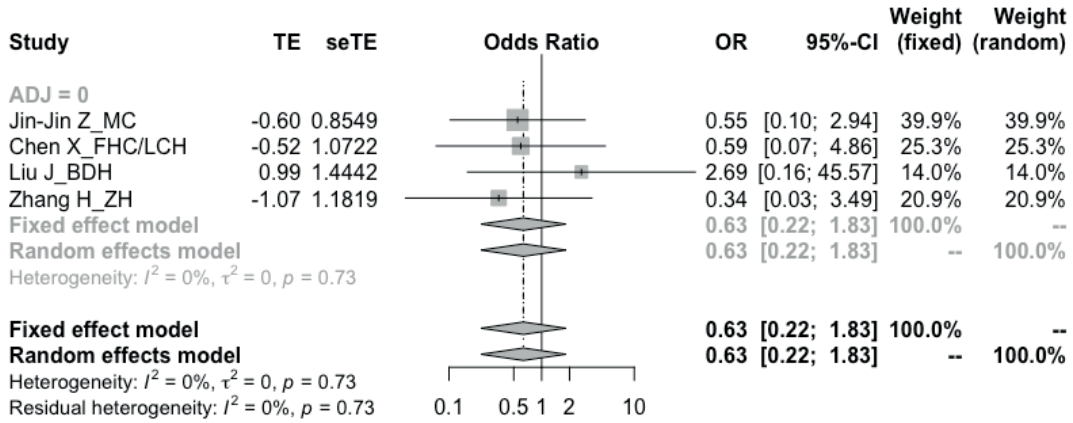

Candidate variable: Any chronic condition or comorbidities, outcome: severe Covid-19 disease, subgroup analysis by risk of bias (high vs moderate/low)

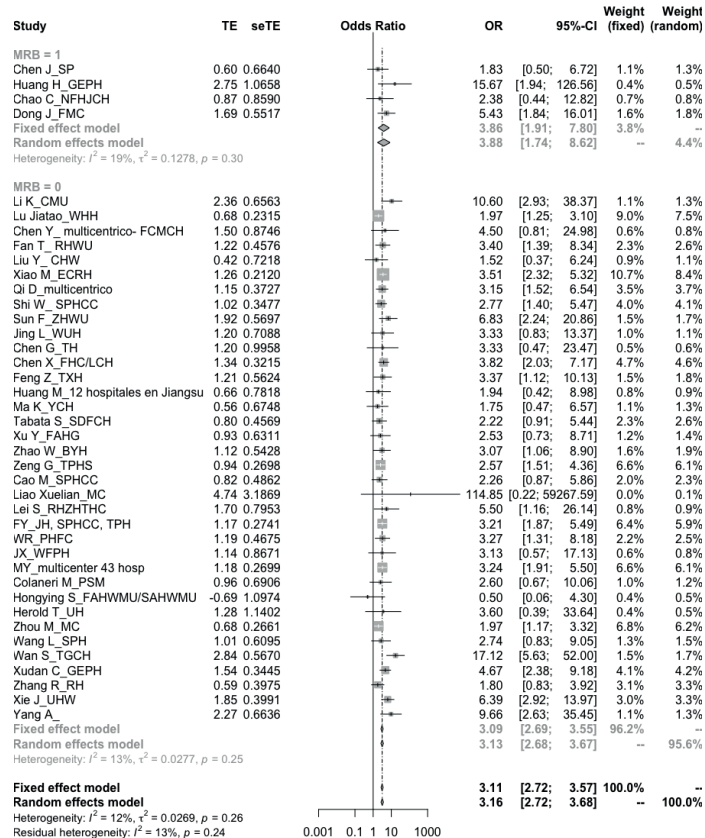

Candidate variable: Respiratory failure, outcome: severe Covid-19 disease, subgroup analysis by risk of bias (high vs moderate/low)

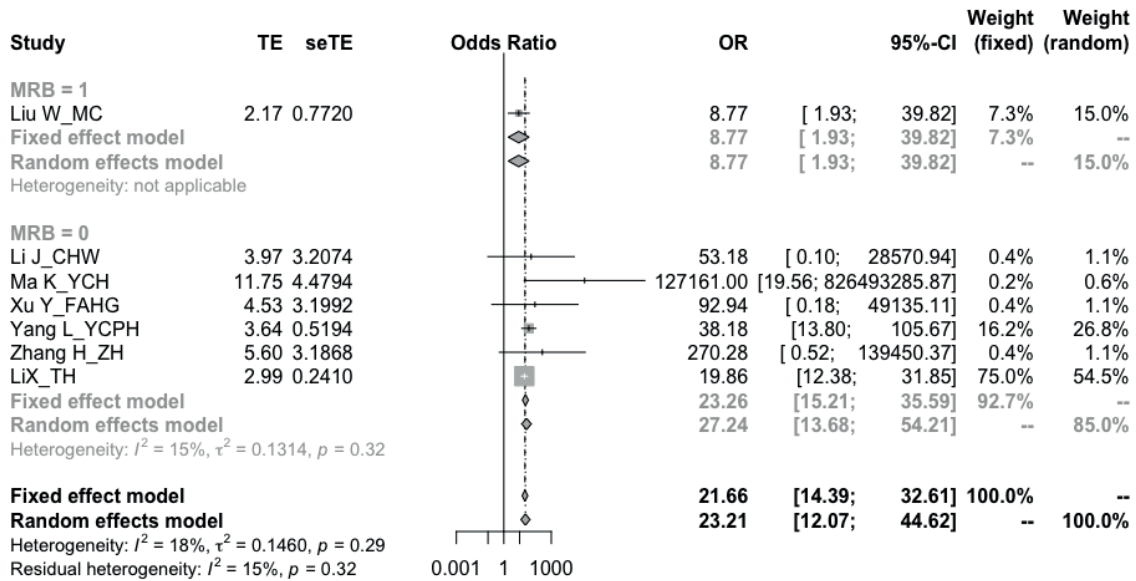

Candidate variable: Tachypnea, outcome: severe Covid-19 disease, subgroup analysis by risk of bias (high vs moderate/low)

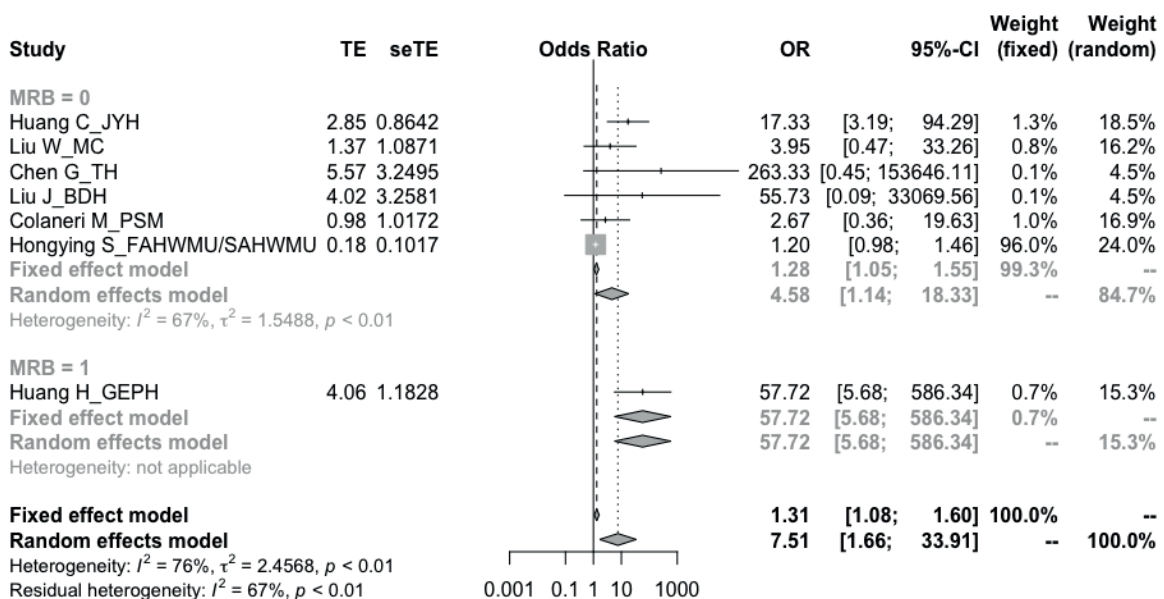

Candidate variable: Hypoxemia, outcome: severe Covid-19 disease

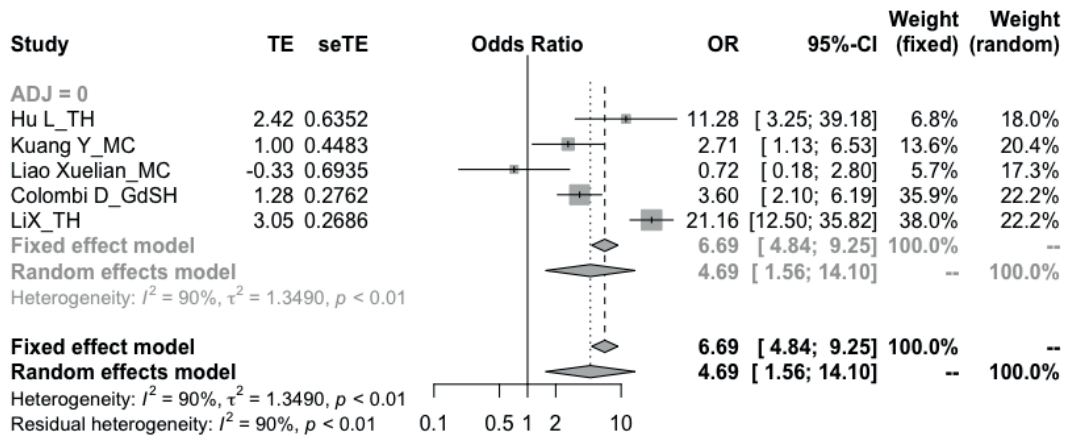

Candidate variable: Dyspnea, outcome: severe Covid-19 disease, subgroup analysis by risk of bias (high vs moderate/low)

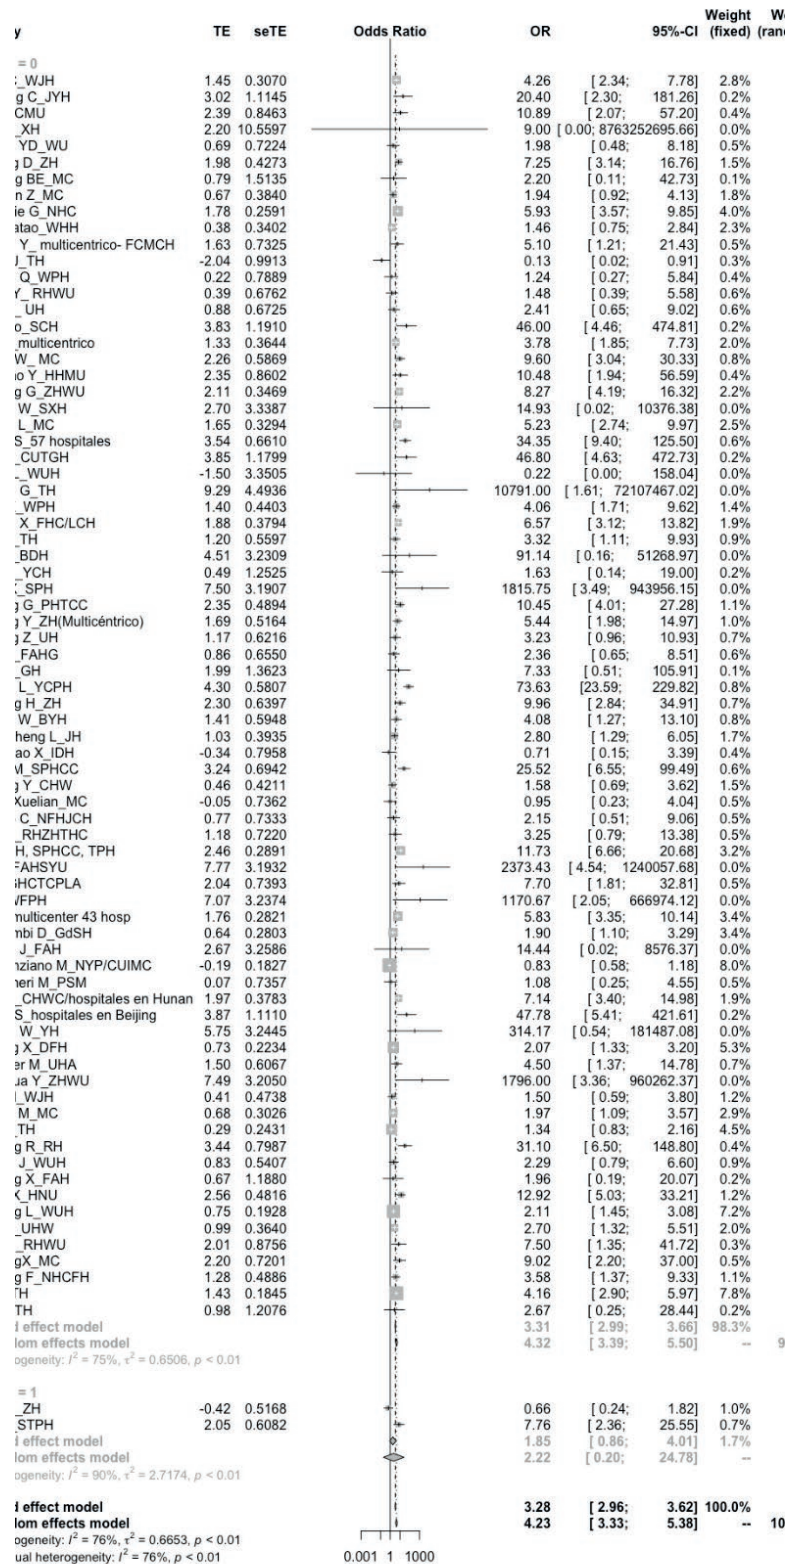

Candidate variable: Chest pain, outcome: severe Covid-19 disease

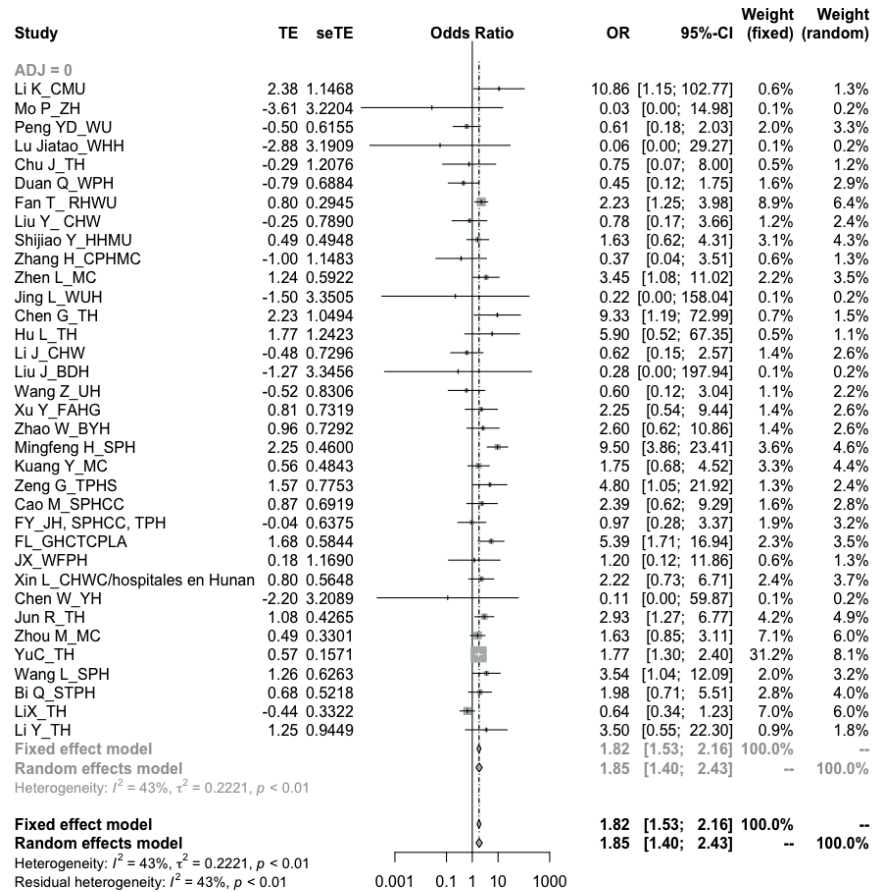



Candidate variable: Low blood pressure, outcome: severe Covid-19 disease, subgroup analysis: (crude vs adjusted)

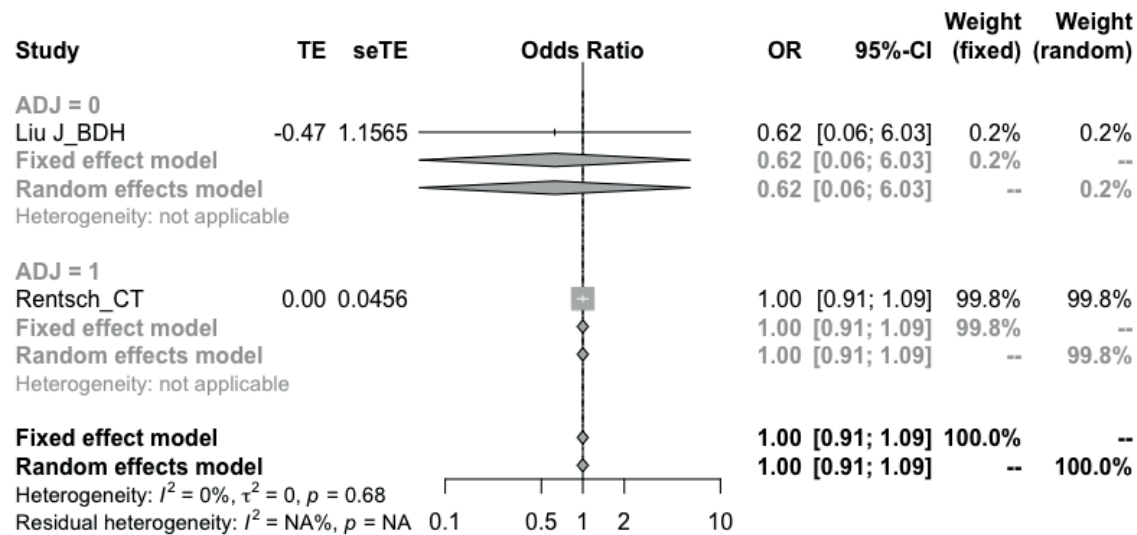

Candidate variable: High fever (more than 39°C), outcome: severe Covid-19 disease

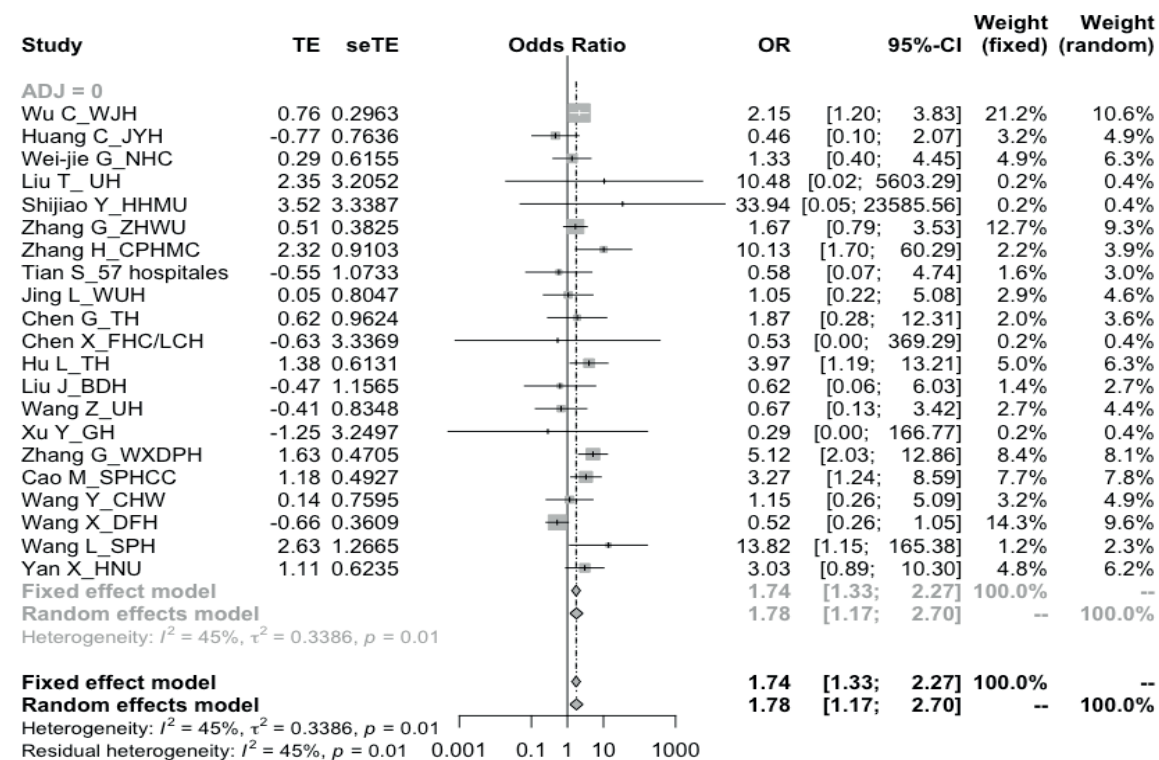

Candidate variable: Fever, outcome: severe Covid-19 disease, subgroup analysis by risk of bias (high vs moderate/low)

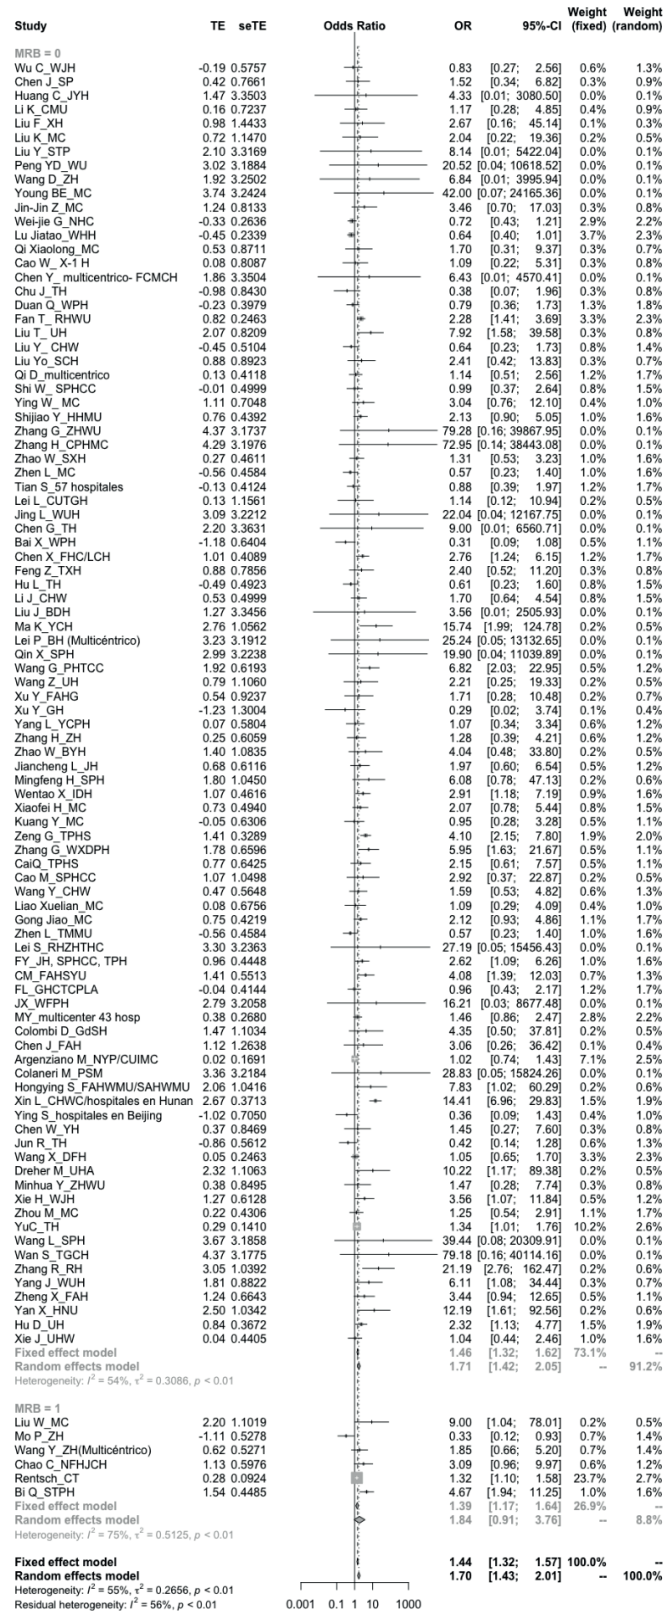

Candidate variable: Rhinorrhea, outcome: severe Covid-19 disease

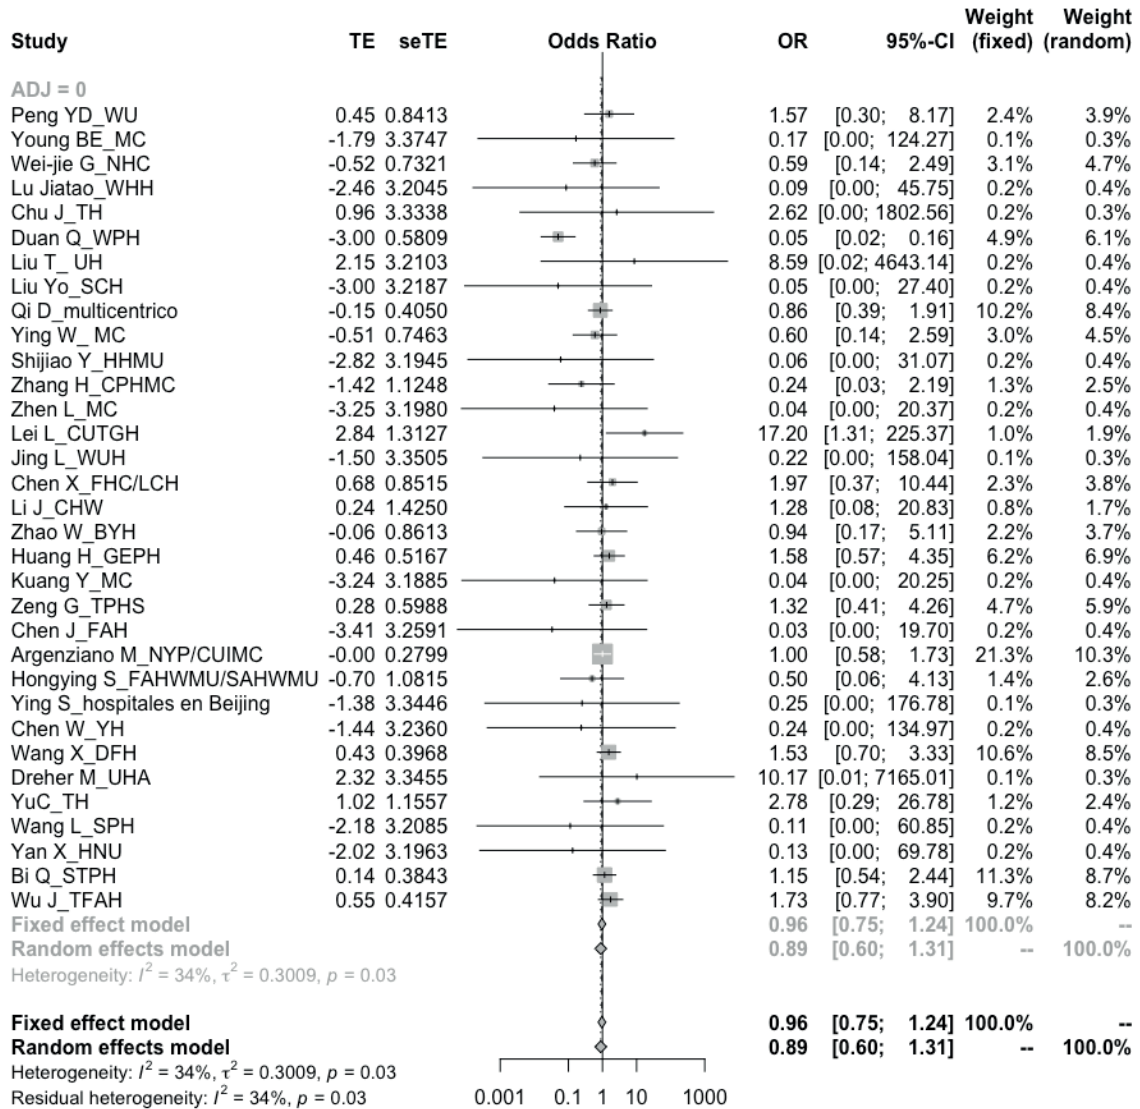

Candidate variable: Odynophagia, outcome: severe Covid-19 disease, subgroup analysis: (crude vs adjusted)

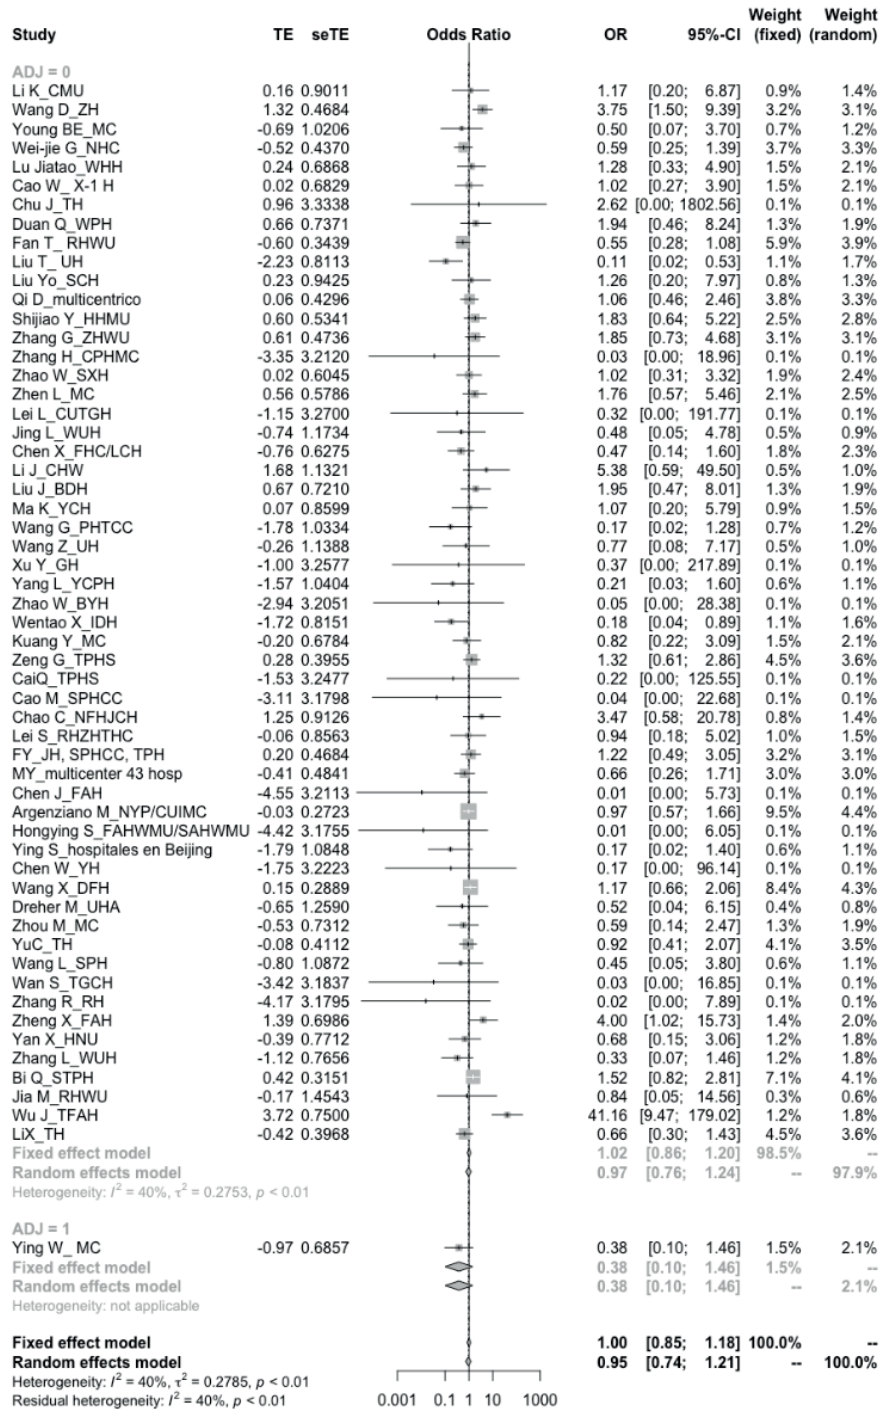

Candidate variable: Conjunctivitis, outcome: severe Covid-19 disease

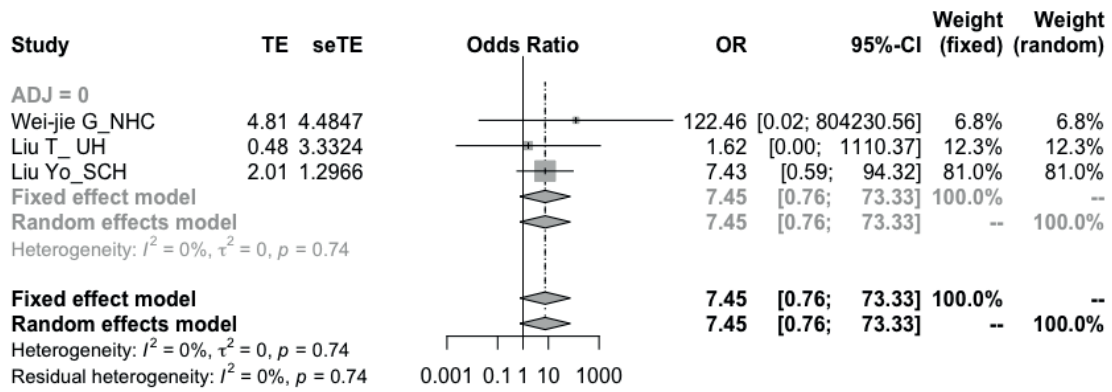



Candidate variable: Cough, outcome: severe Covid-19 disease, subgroup analysis by risk of bias (high vs moderate/low)

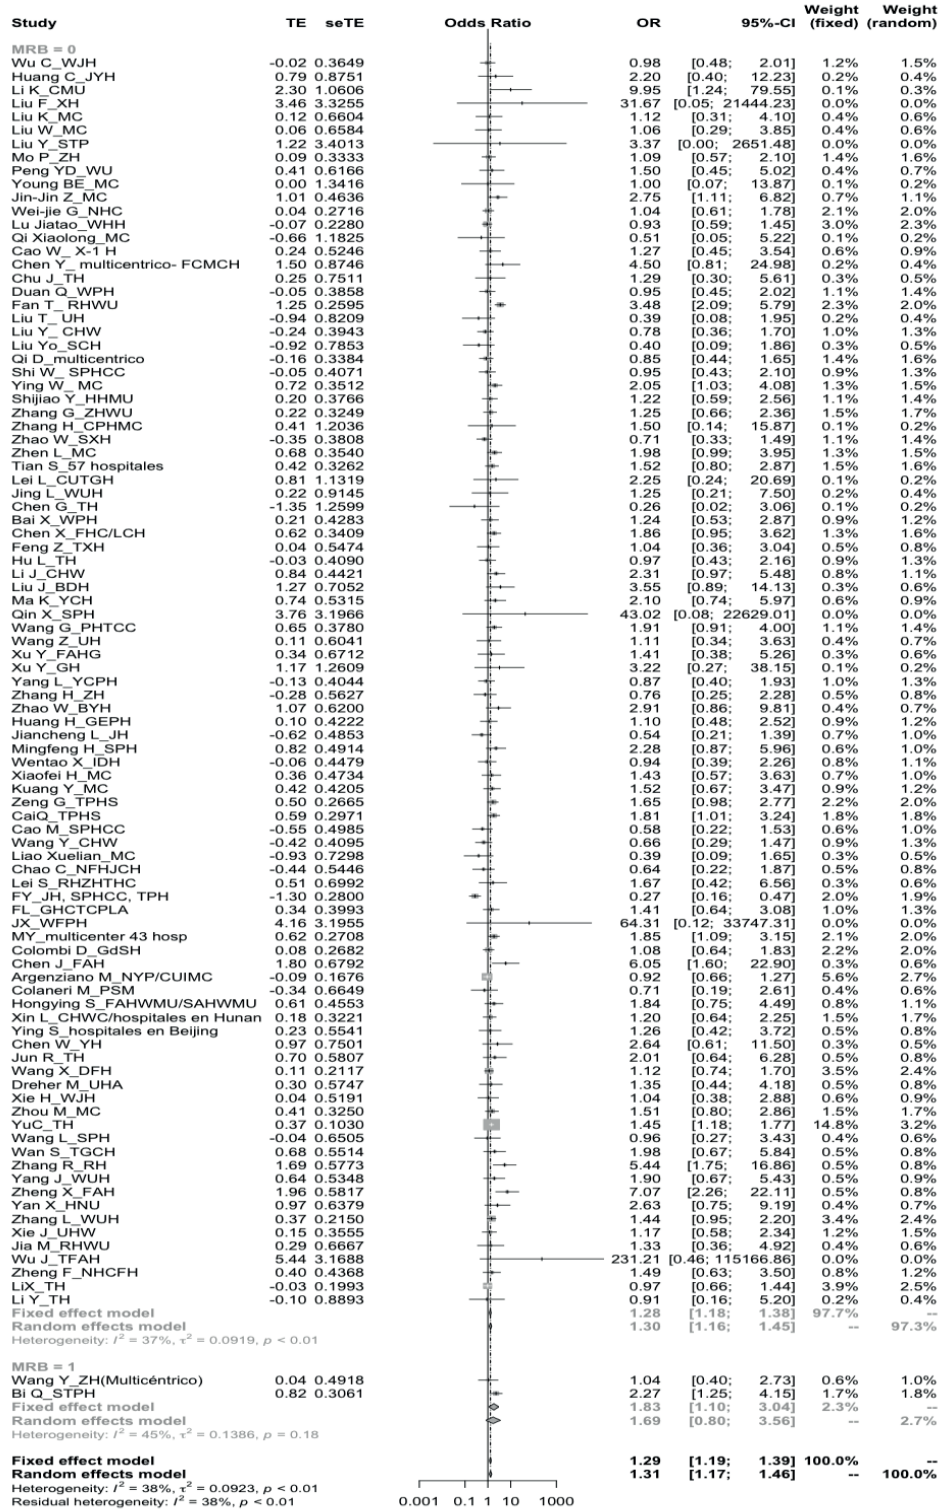



Candidate variable: Productive Cough, outcome: severe Covid-19 disease, subgroup analysis: (crude vs adjusted)

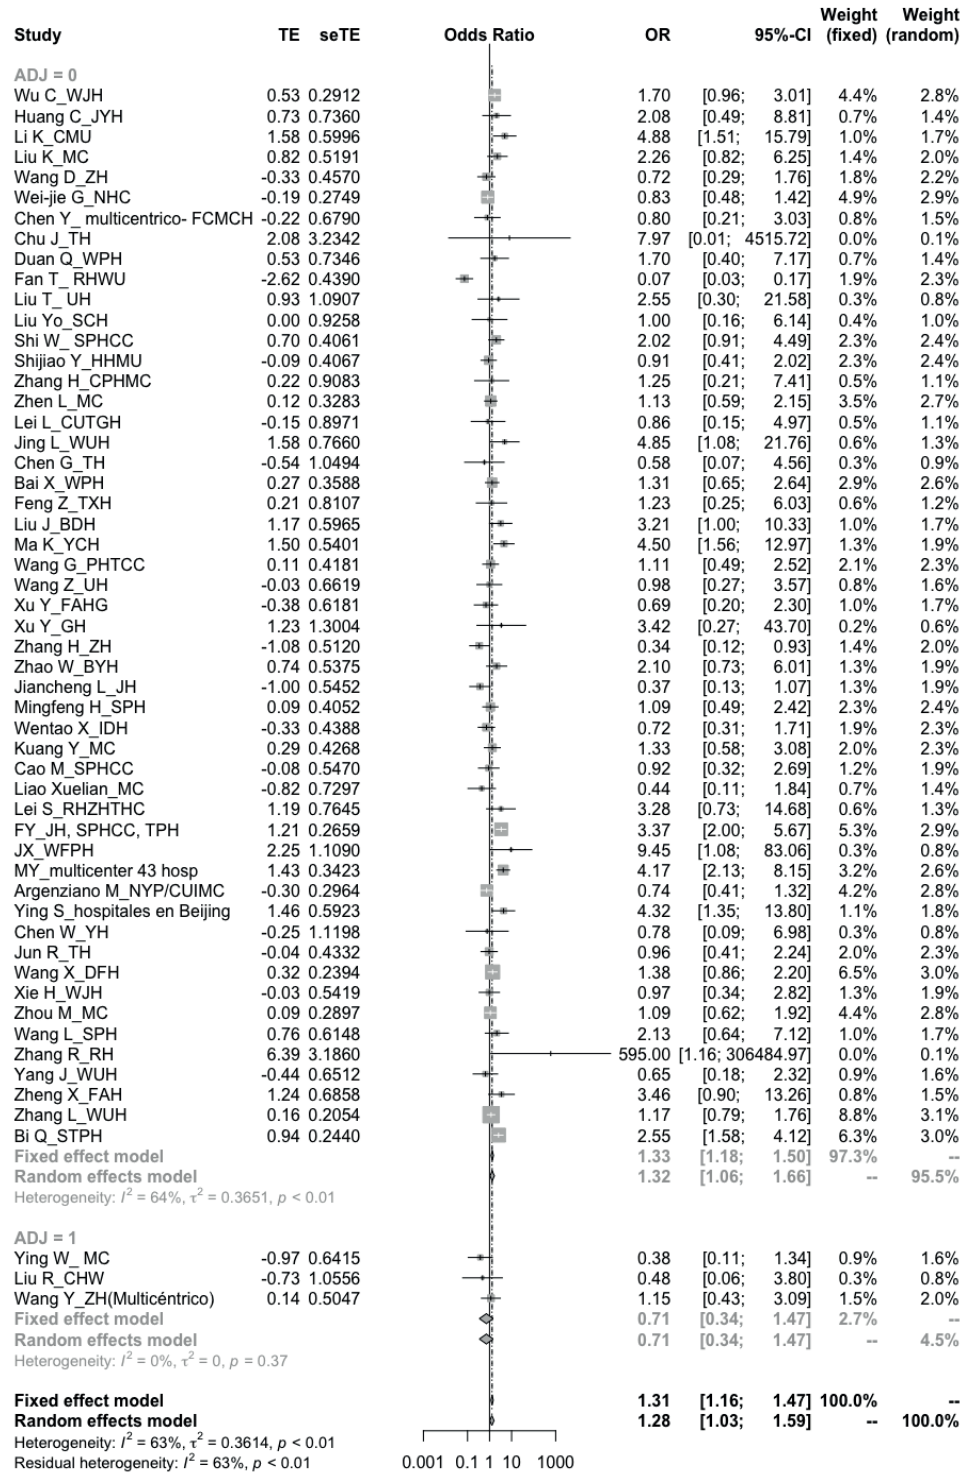

Candidate variable: Hemoptysis, outcome: severe Covid-19 disease

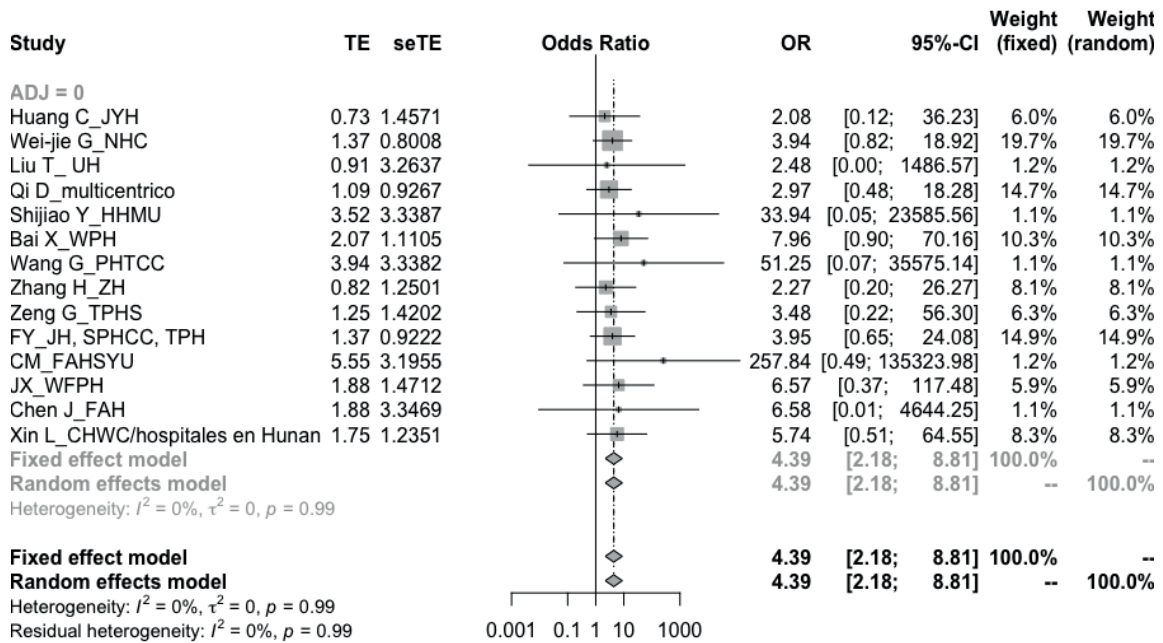

Candidate variable: Fatigue, outcome: severe Covid-19 disease, subgroup analysis: (crude vs adjusted)

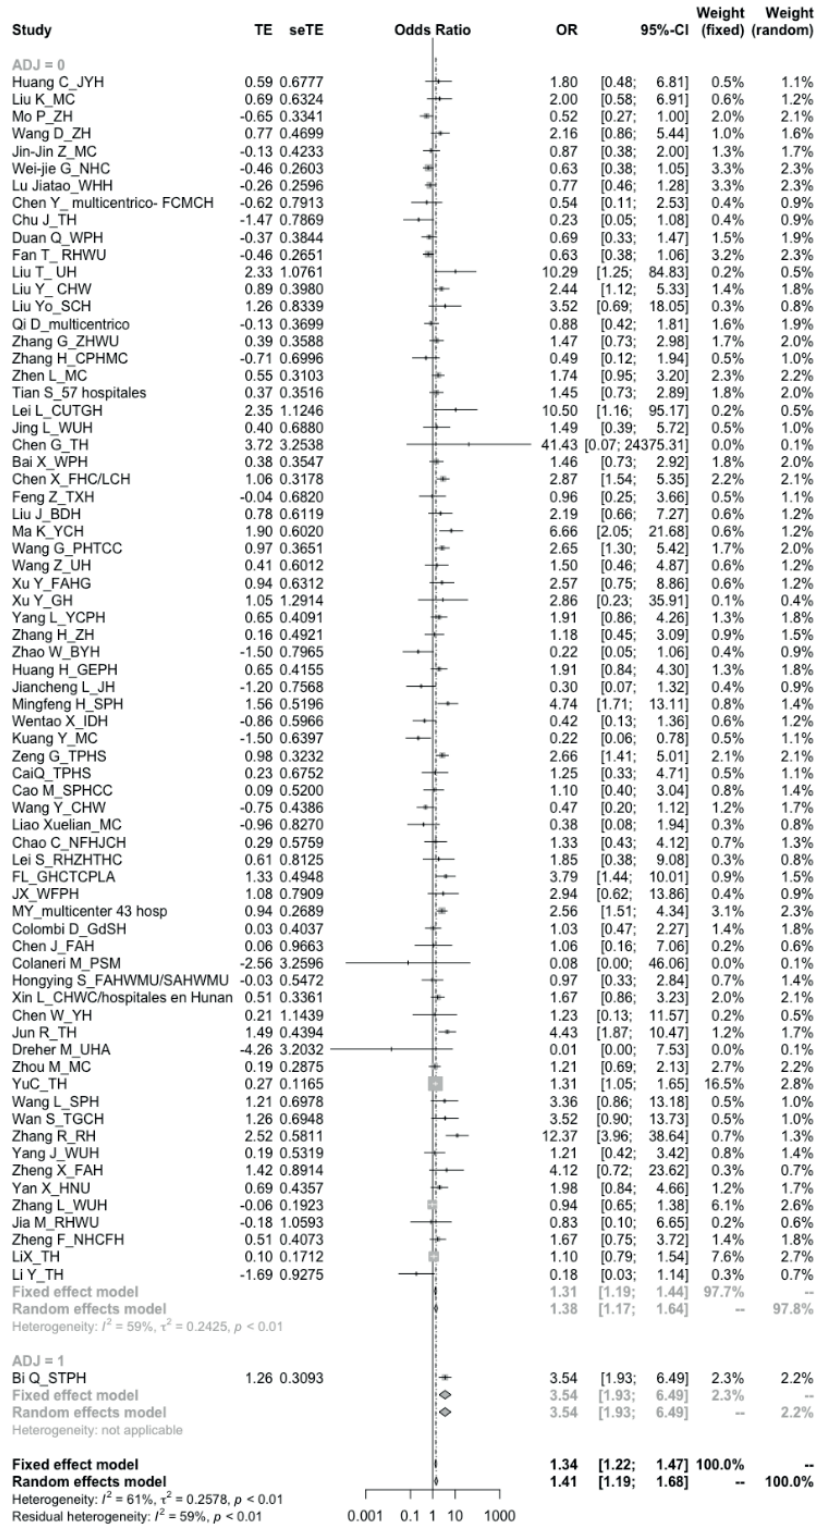

Candidate variable: Myalgia/arthralgia, outcome: severe Covid-19 disease, subgroup analysis: (crude vs adjusted)

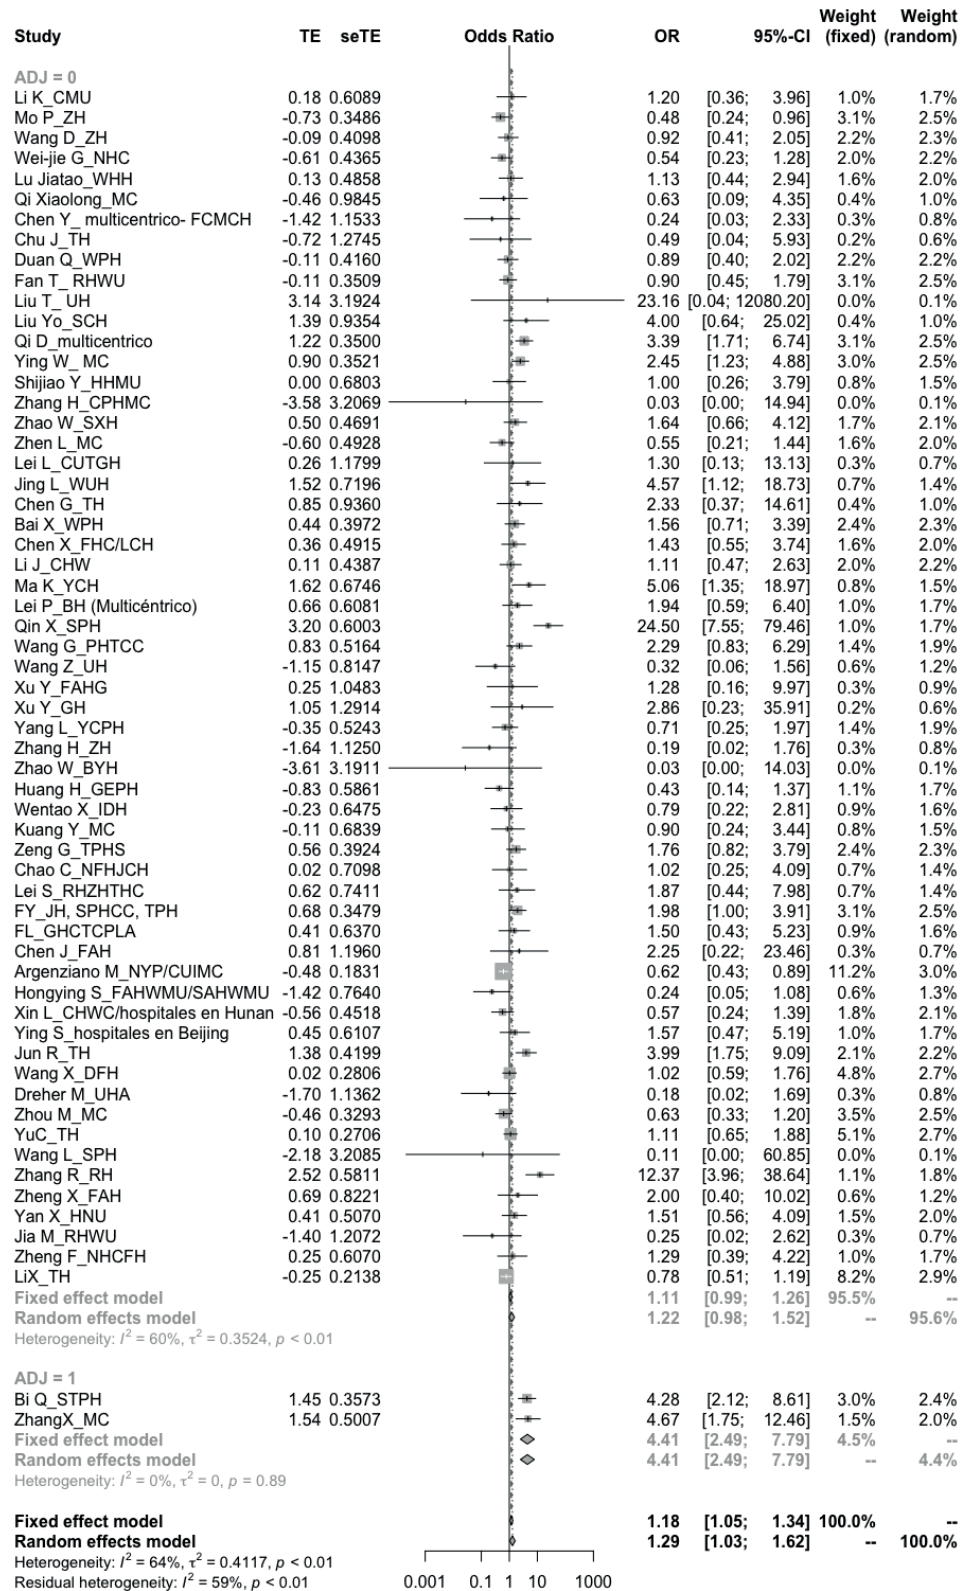

Candidate variable: Headache, outcome: severe Covid-19 disease, subgroup analysis: (crude vs adjusted)

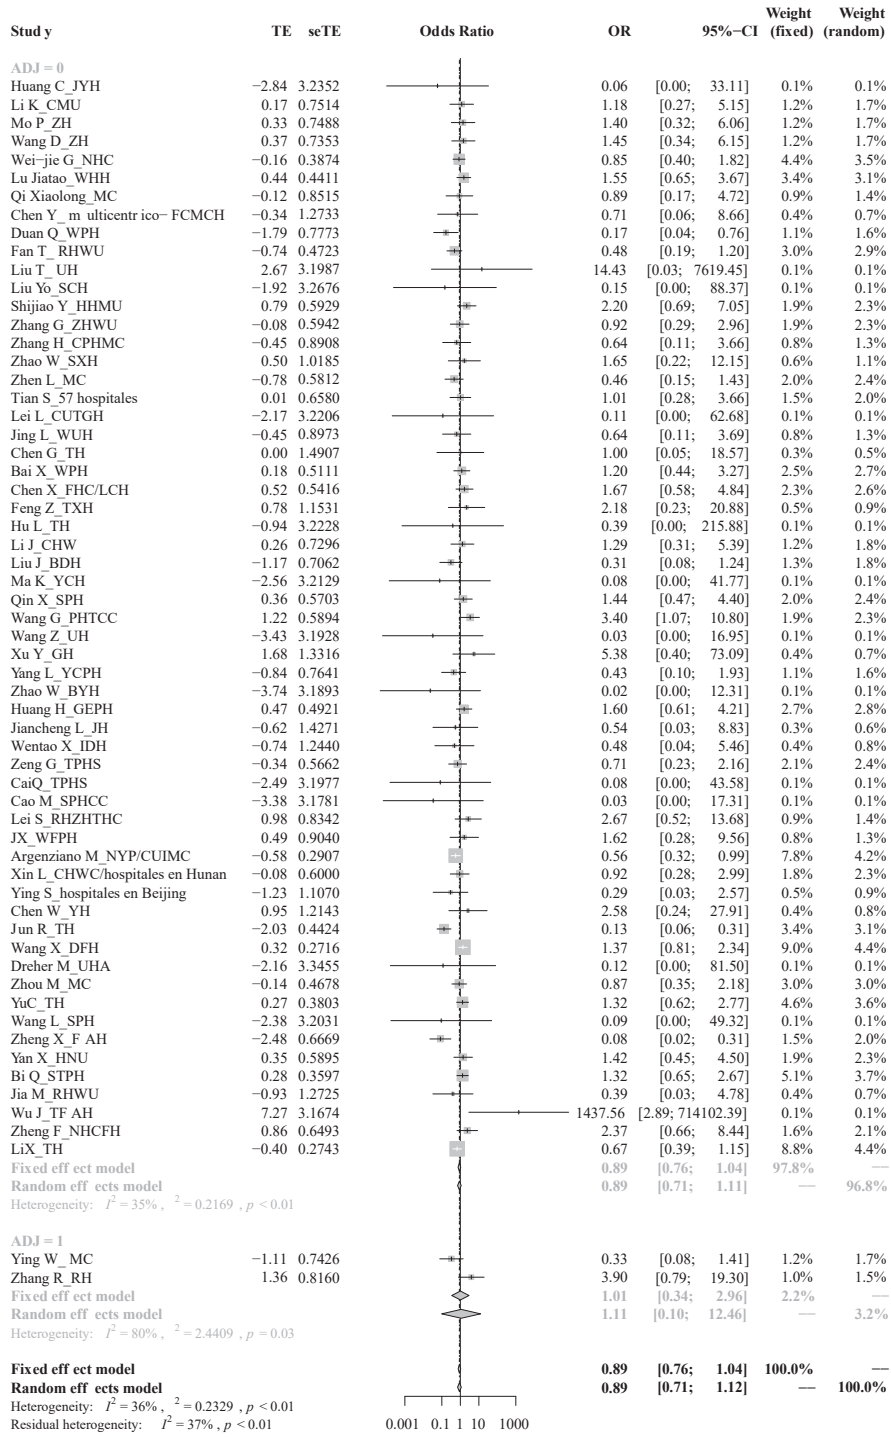

Candidate variable: Vomits, outcome: severe Covid-19 disease, subgroup analysis: (crude vs adjusted)

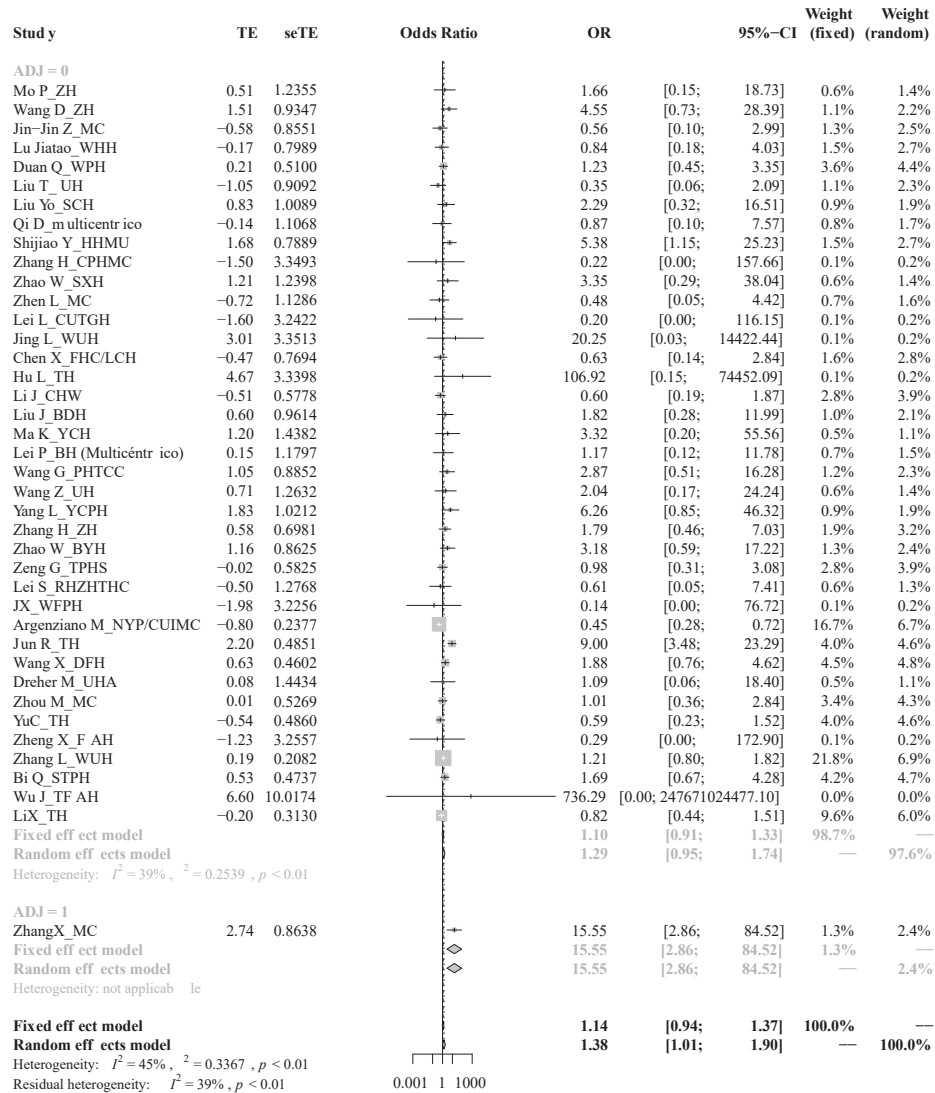



Candidate variable: Diarrhea, outcome: severe Covid-19 disease, subgroup analysis: (crude vs adjusted)

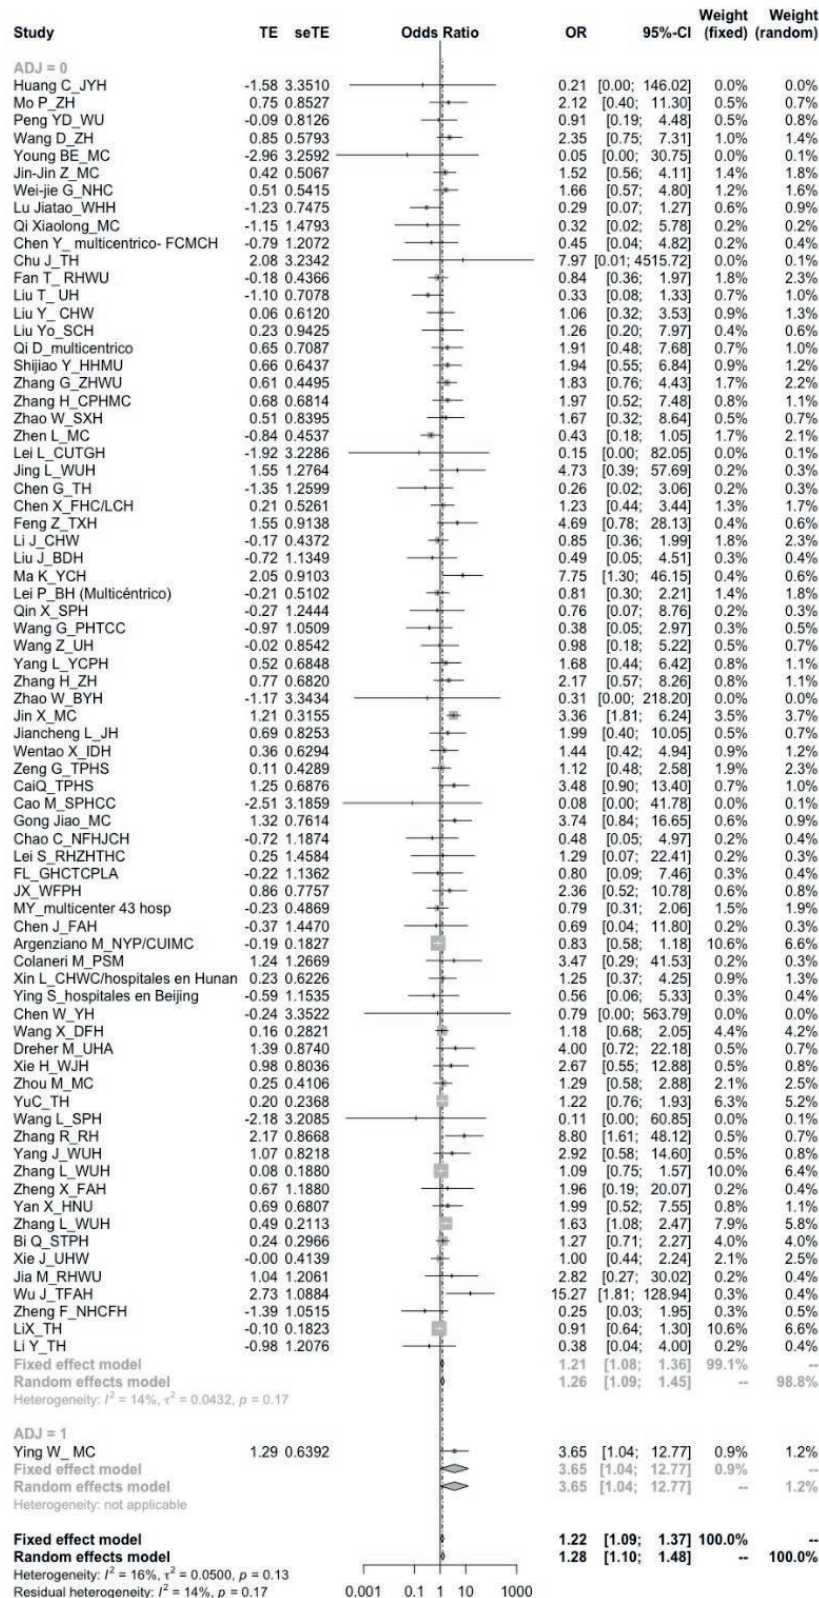

Candidate variable: Anorexia, outcome: severe Covid-19 disease, subgroup analysis: (crude vs adjusted)

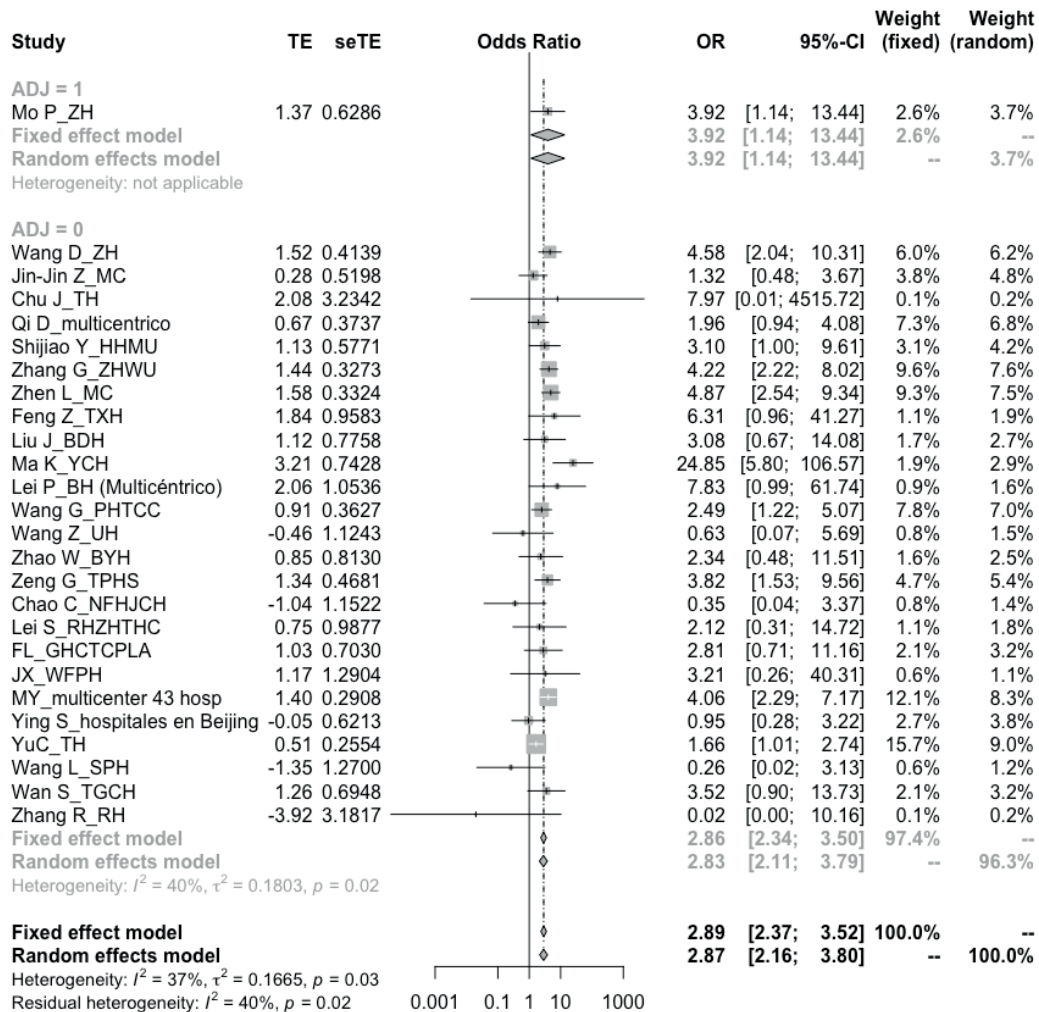

Candidate variable: Abdominal pain, outcome: severe Covid-19 disease

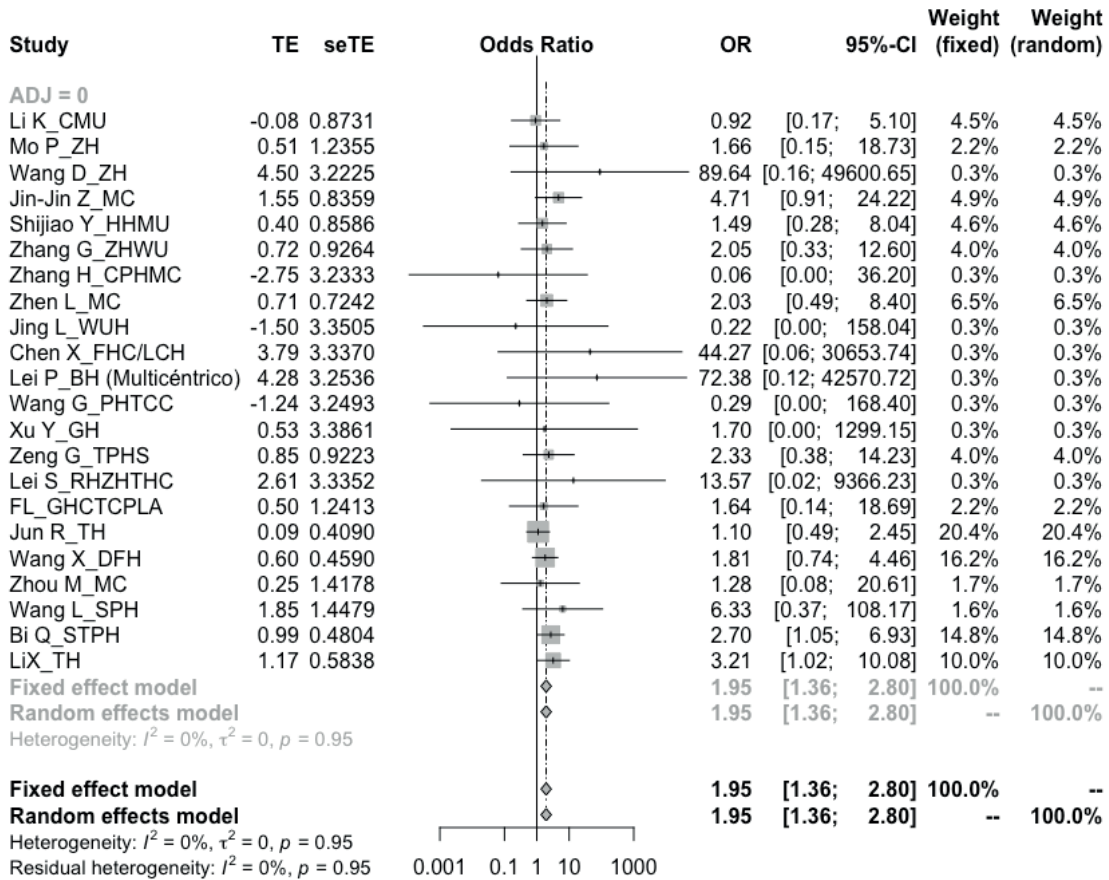

Candidate variable: Anemia, outcome: severe Covid-19 disease, subgroup analysis by risk of bias (high vs moderate/low)

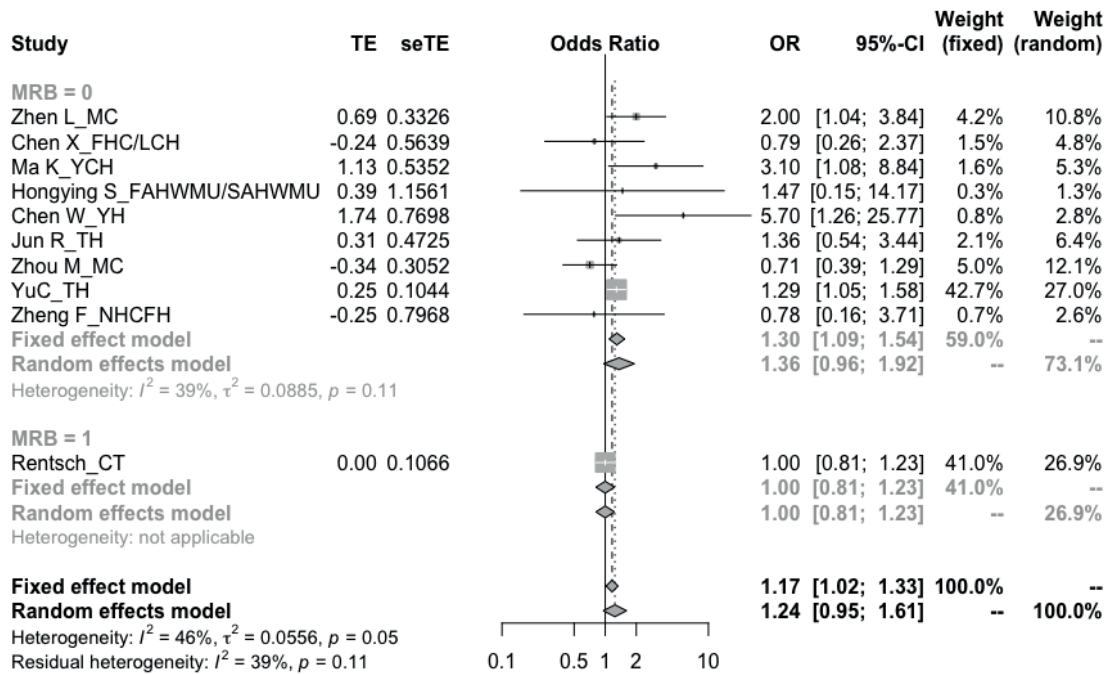

Candidate variable: High WBC (greater than  $10.0 \times 10^9/L$ ), outcome: severe Covid-19 disease, subgroup analysis: (crude vs adjusted)

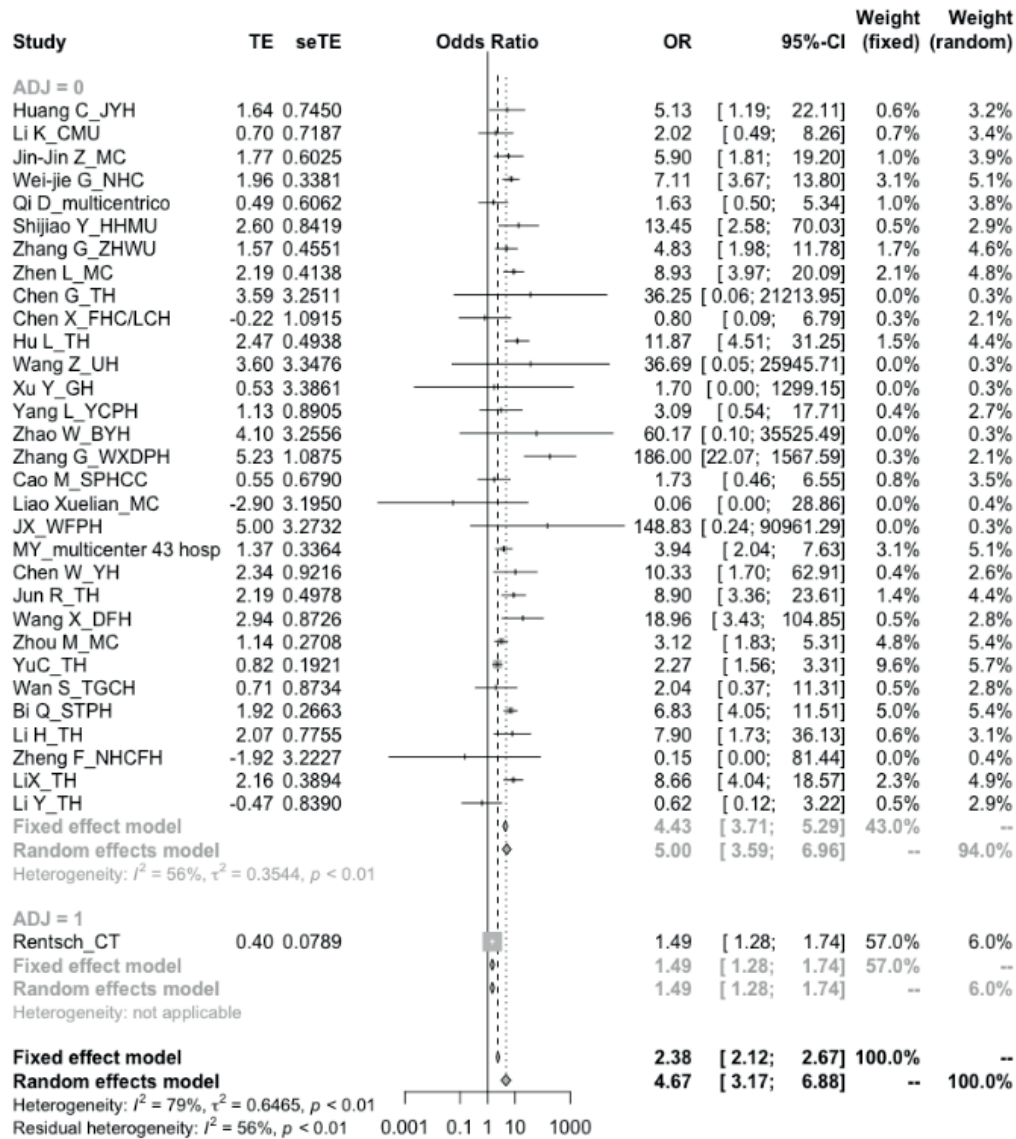



Candidate variable: High Neutrophil count (greater than  $6.3 \times 10^9/L$ ),  
 outcome: severe Covid-19 disease, subgroup analysis: (crude vs adjusted)

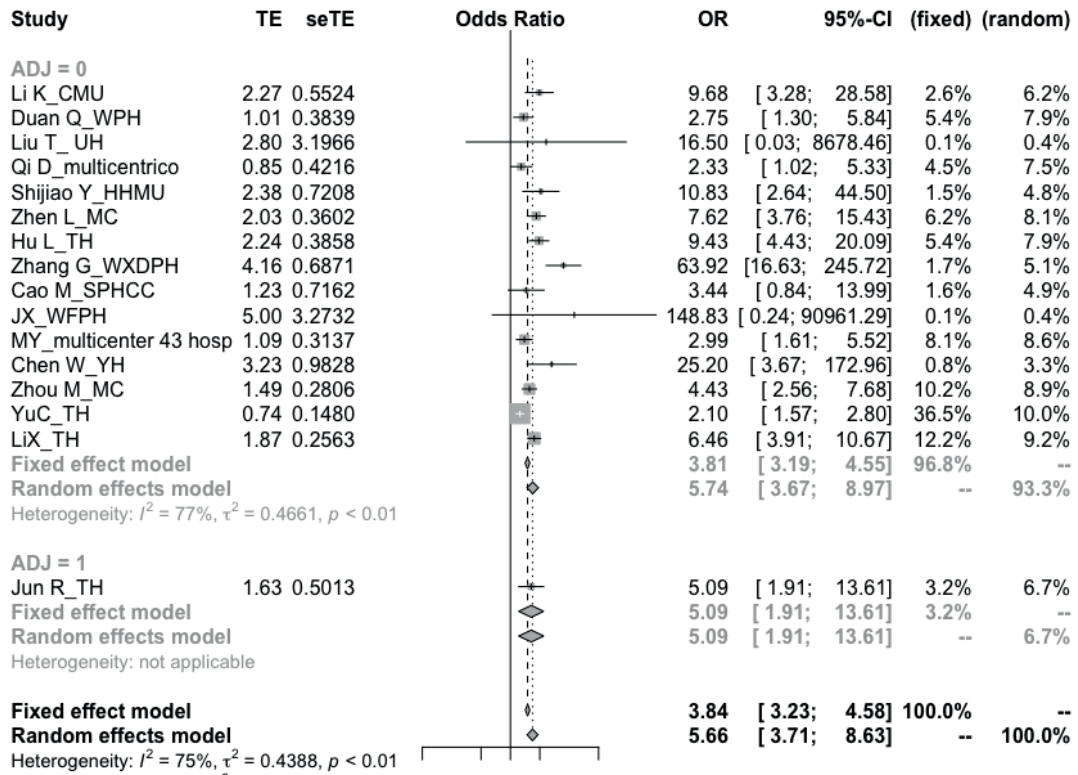



Candidate variable: Neutrophil count increase (per  $1 \times 10^9$  U/L), outcome: severe Covid-19 disease, subgroup analysis by risk of bias (high vs moderate/low)

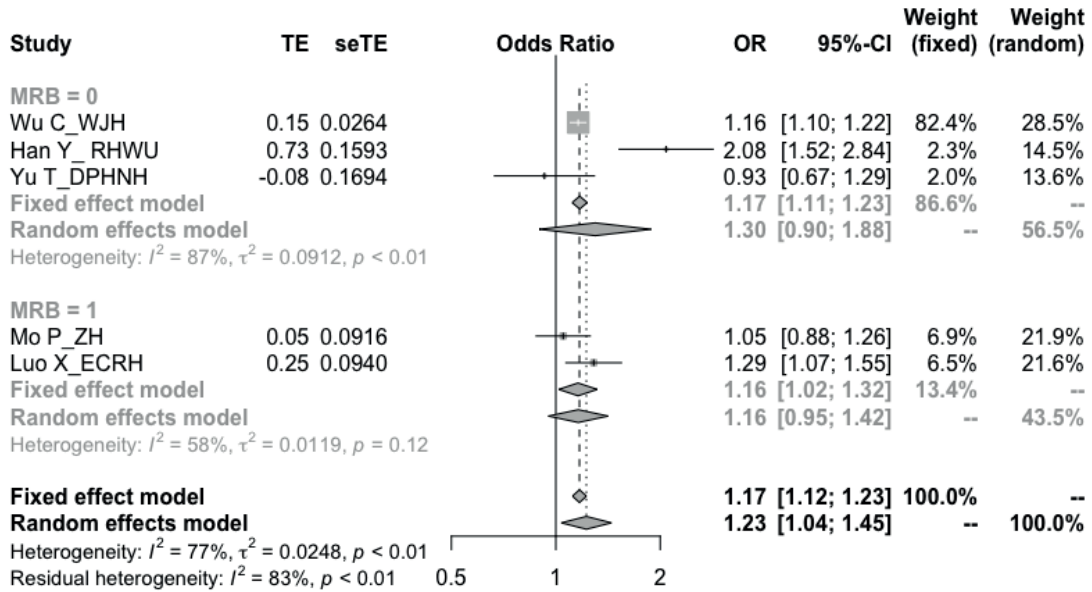

Candidate variable: Low neutrophil count (Less than  $1.8 \times 10^9/L$ ), outcome: severe Covid-19 disease

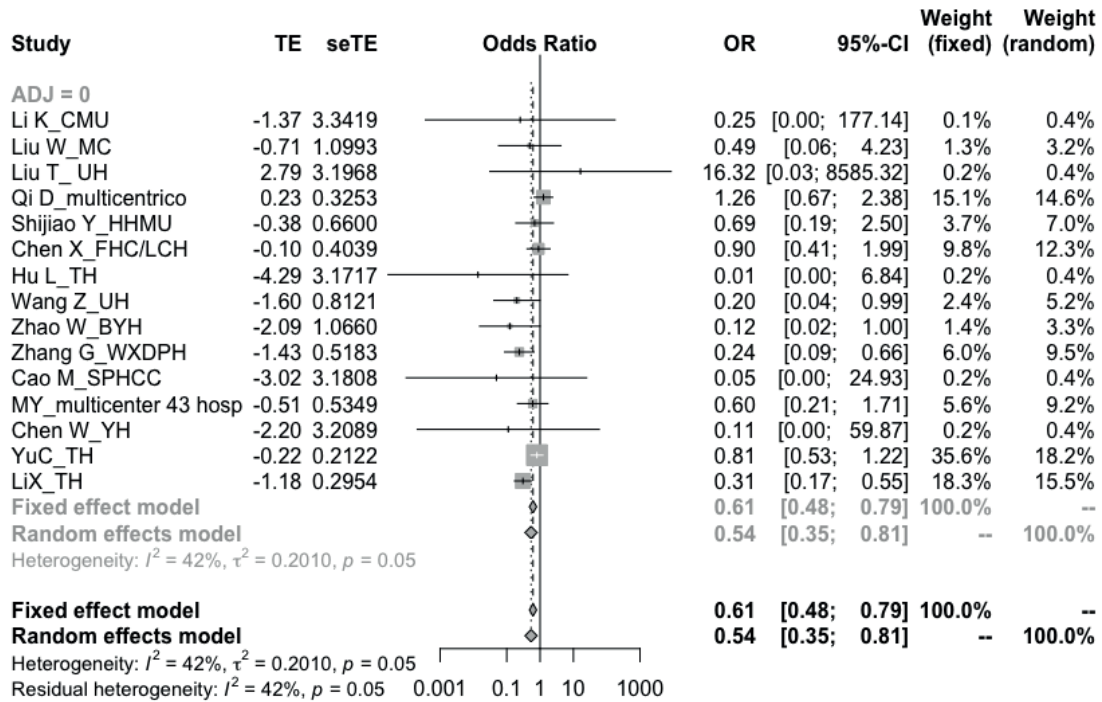

Candidate variable: Leukopenia (Less than  $3.5-4 \times 10^9/L$ ), outcome: severe Covid-19 disease

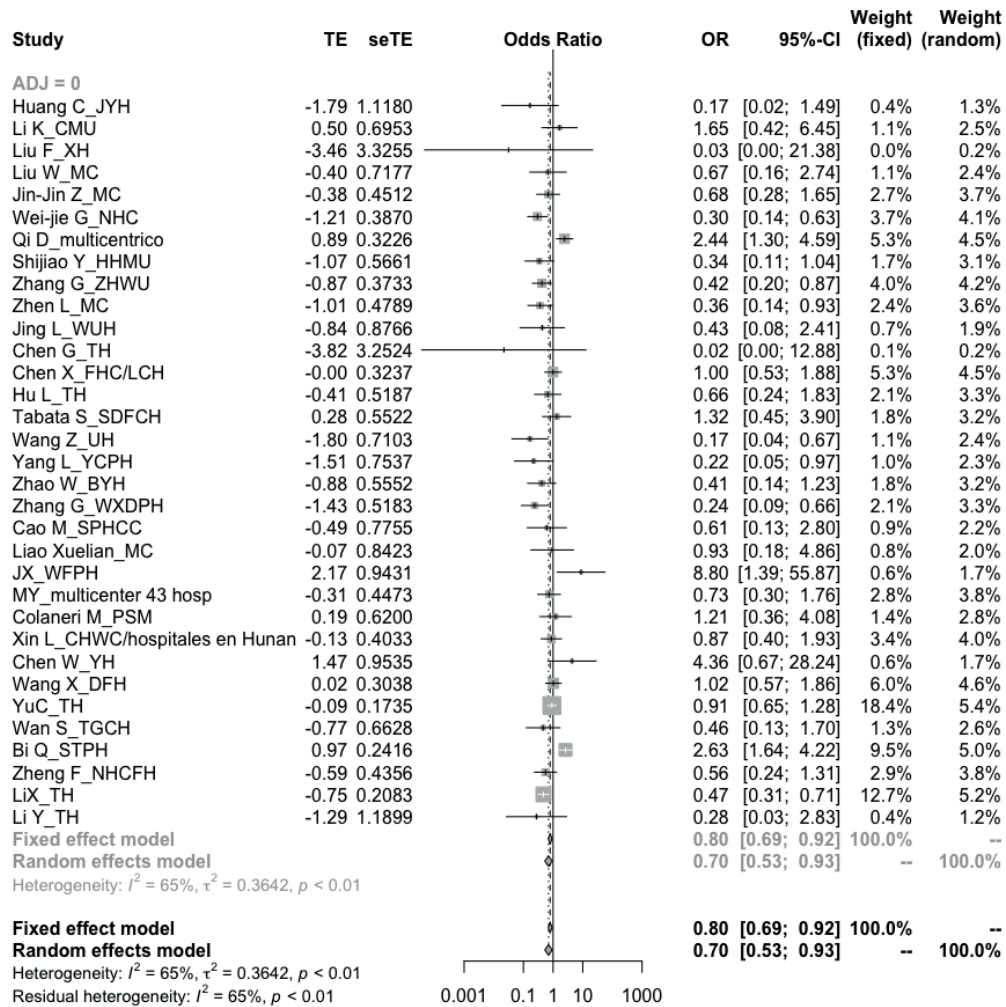

Candidate variable: Low Lymphocyte count (less than 0.8-1.5x 10<sup>9</sup>/L),  
 outcome: severe Covid-19 disease, subgroup analysis by risk of bias (high vs moderate/low)

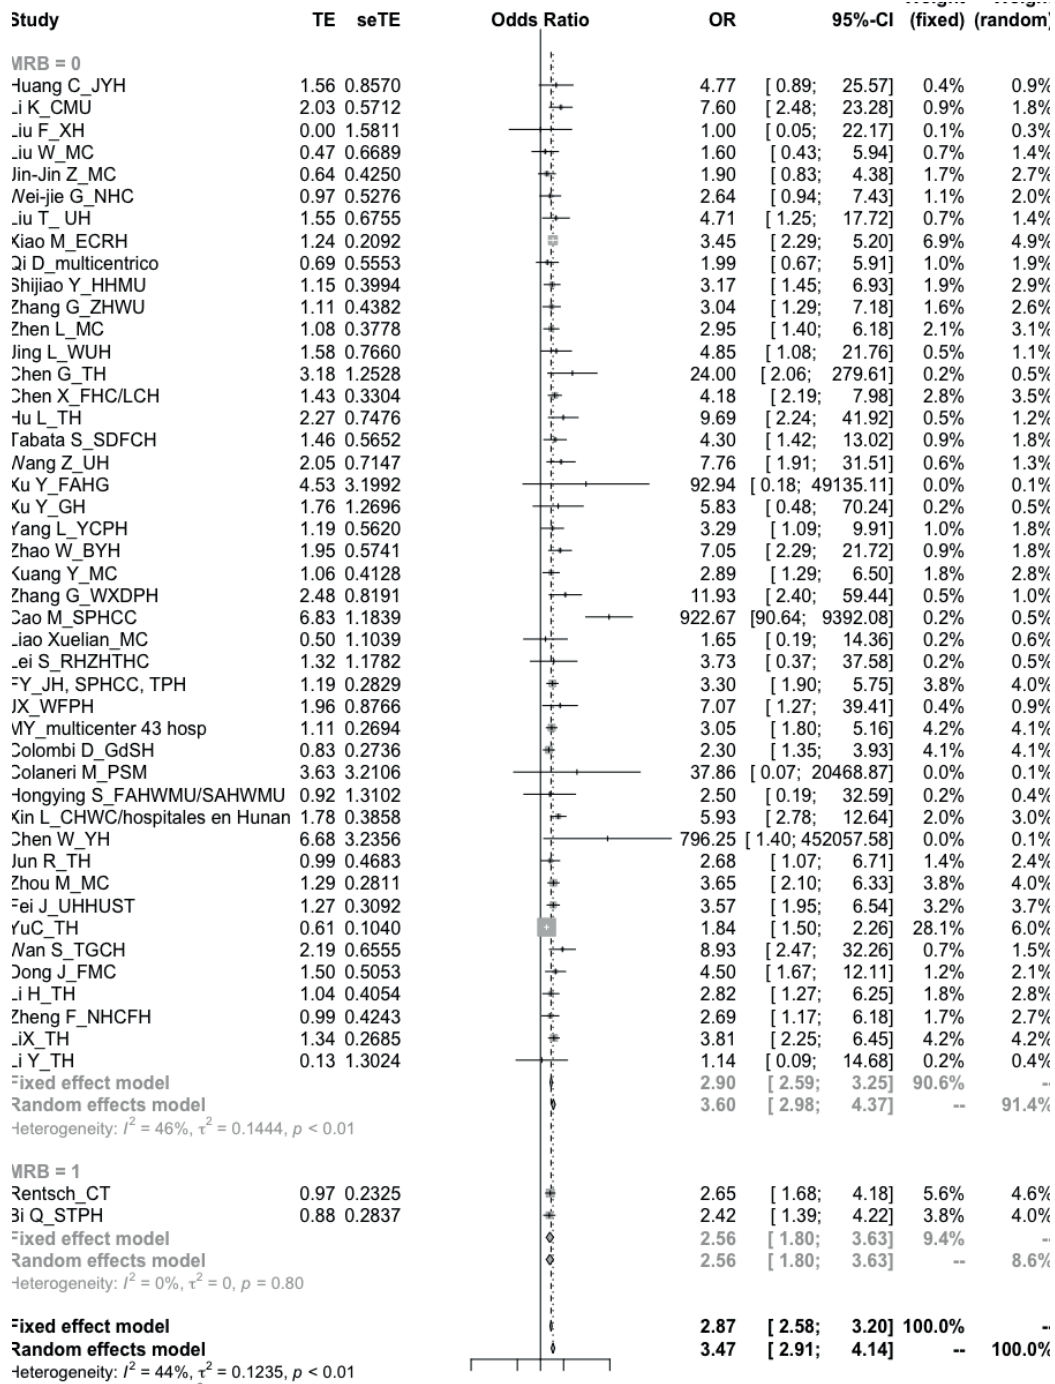

Candidate variable: Low platelet count (less than 100-150 x 10<sup>9</sup>/L), outcome:severe Covid-19 disease, subgroup analysis by risk of bias (high vs moderate/low)

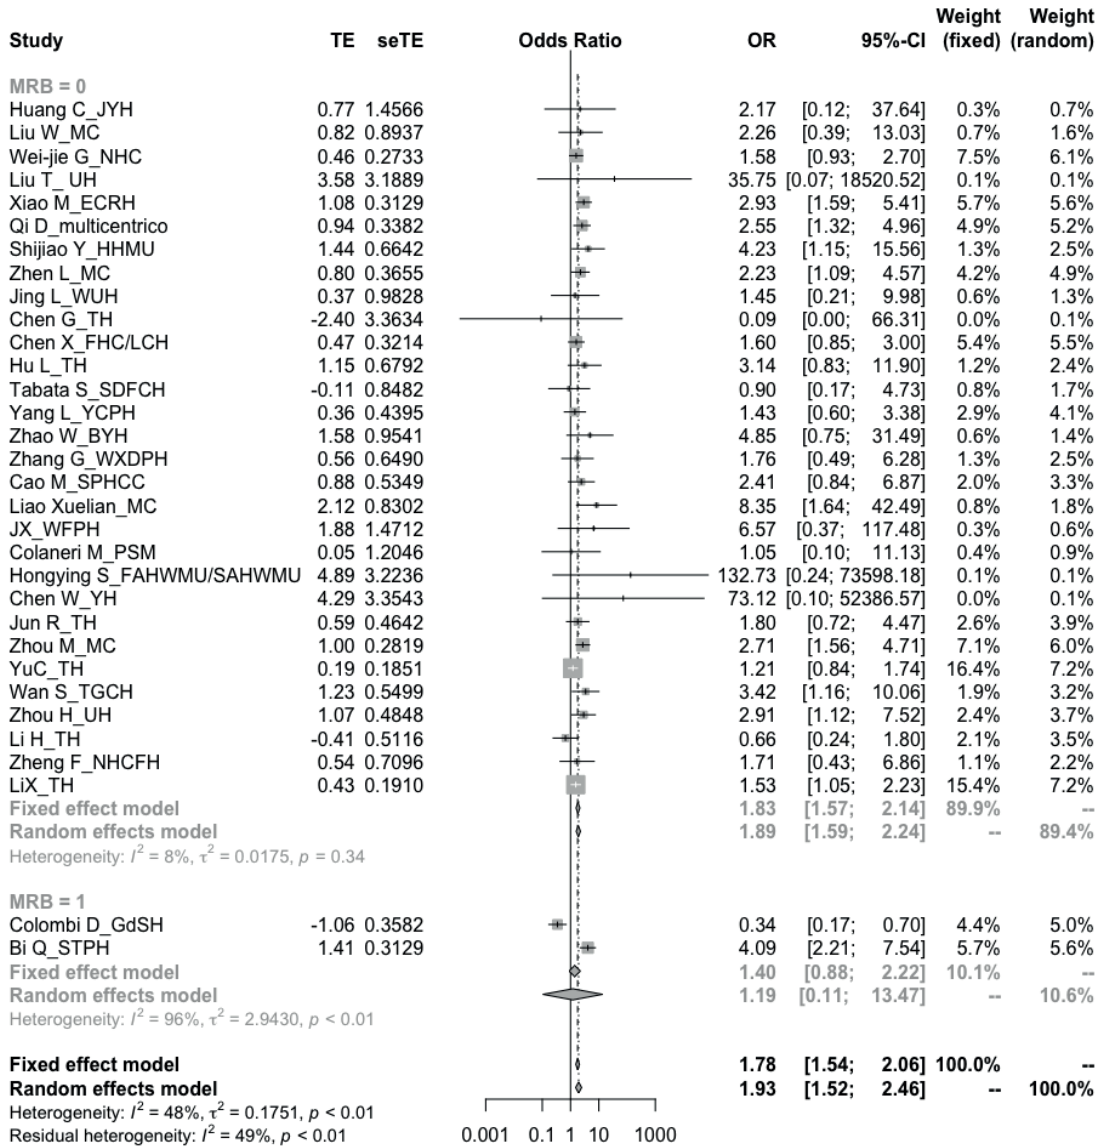

Candidate variable: High creatinine (more than 1.5 mg%), outcome: severe Covid-19 disease, subgroup analysis by risk of bias (high vs moderate/low)

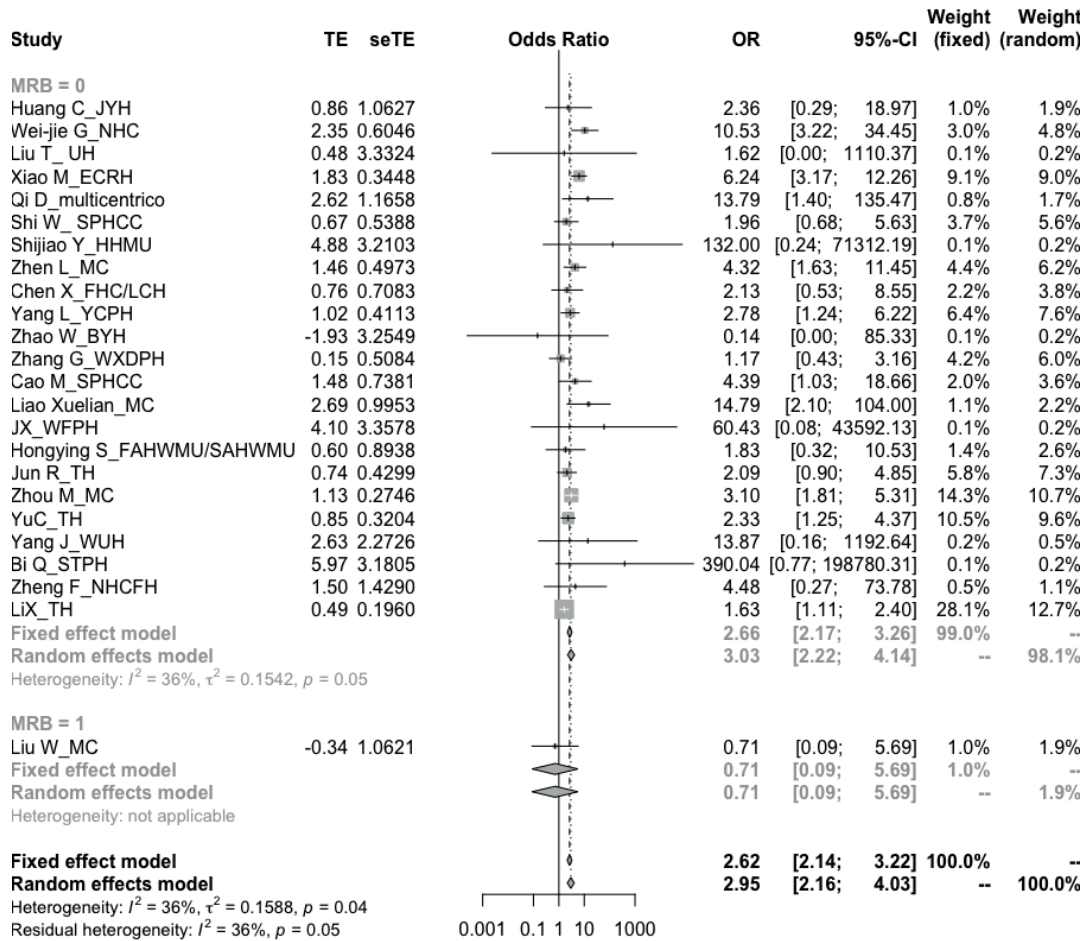



Candidate variable: Creatinine increase (per 0.1 mg%), outcome: severe Covid-19 disease, subgroup analysis: (crude vs adjusted)

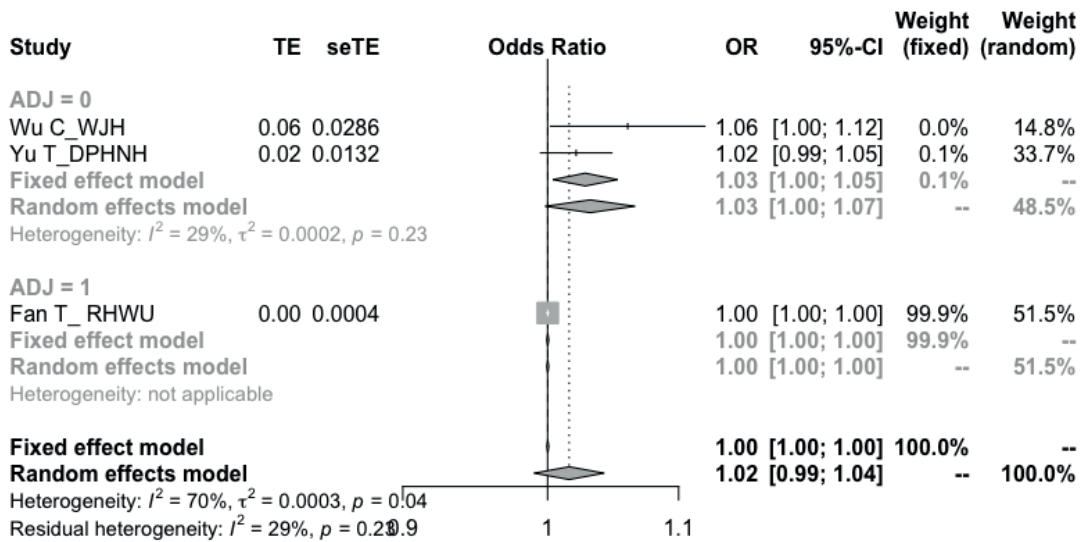

Candidate variable: Acute kidney injury, outcome: severe Covid-19 disease

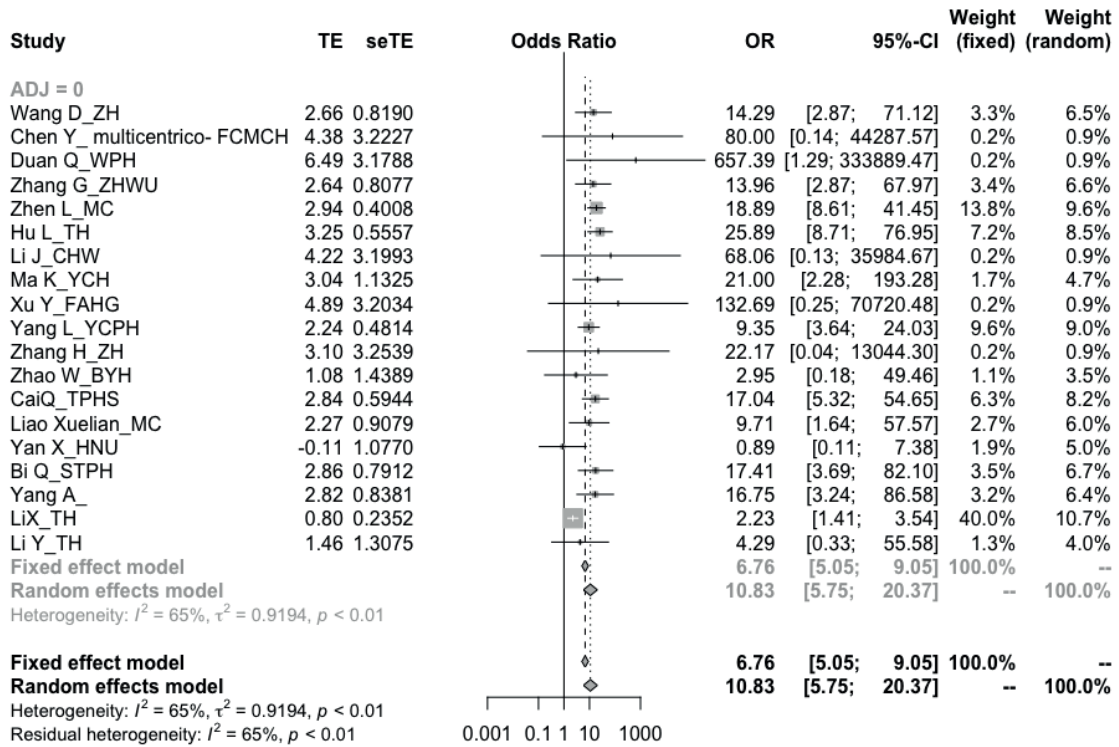

Candidate variable: High BUN (more than 5.2-9.5 mmol/L), outcome: severe Covid-19 disease, subgroup analysis: (crude vs adjusted)

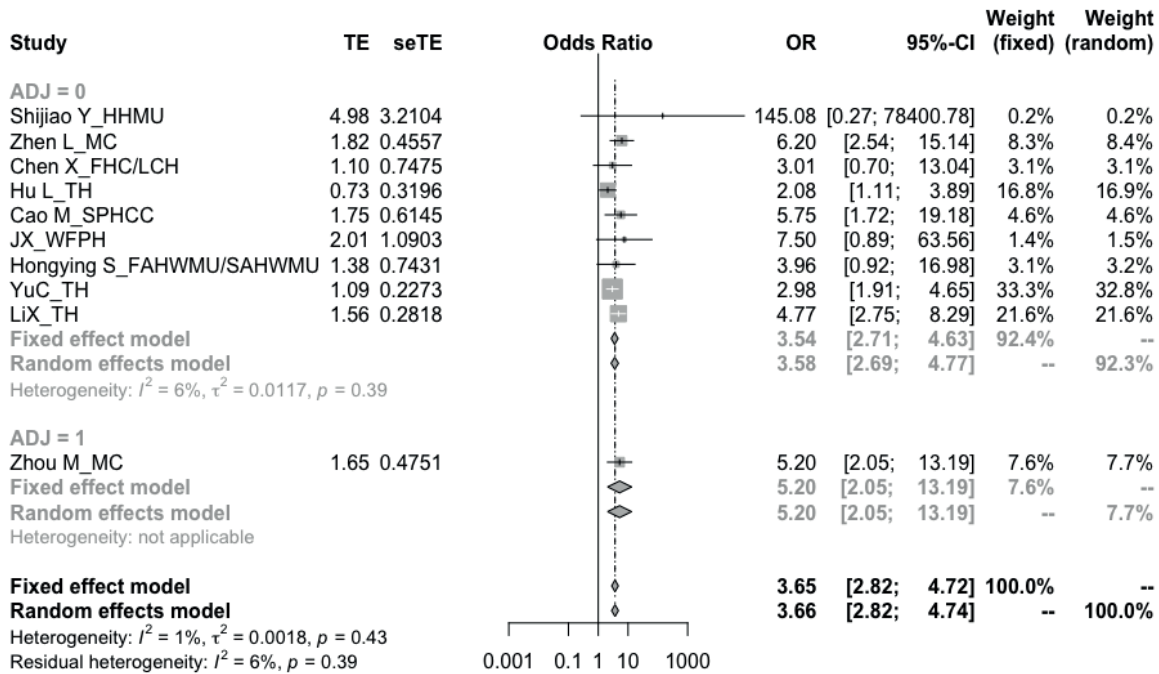

Candidate variable: High LDH (more than 240-250 U/L), outcome: severe Covid-19 disease, subgroup analysis by risk of bias (high vs moderate/low)

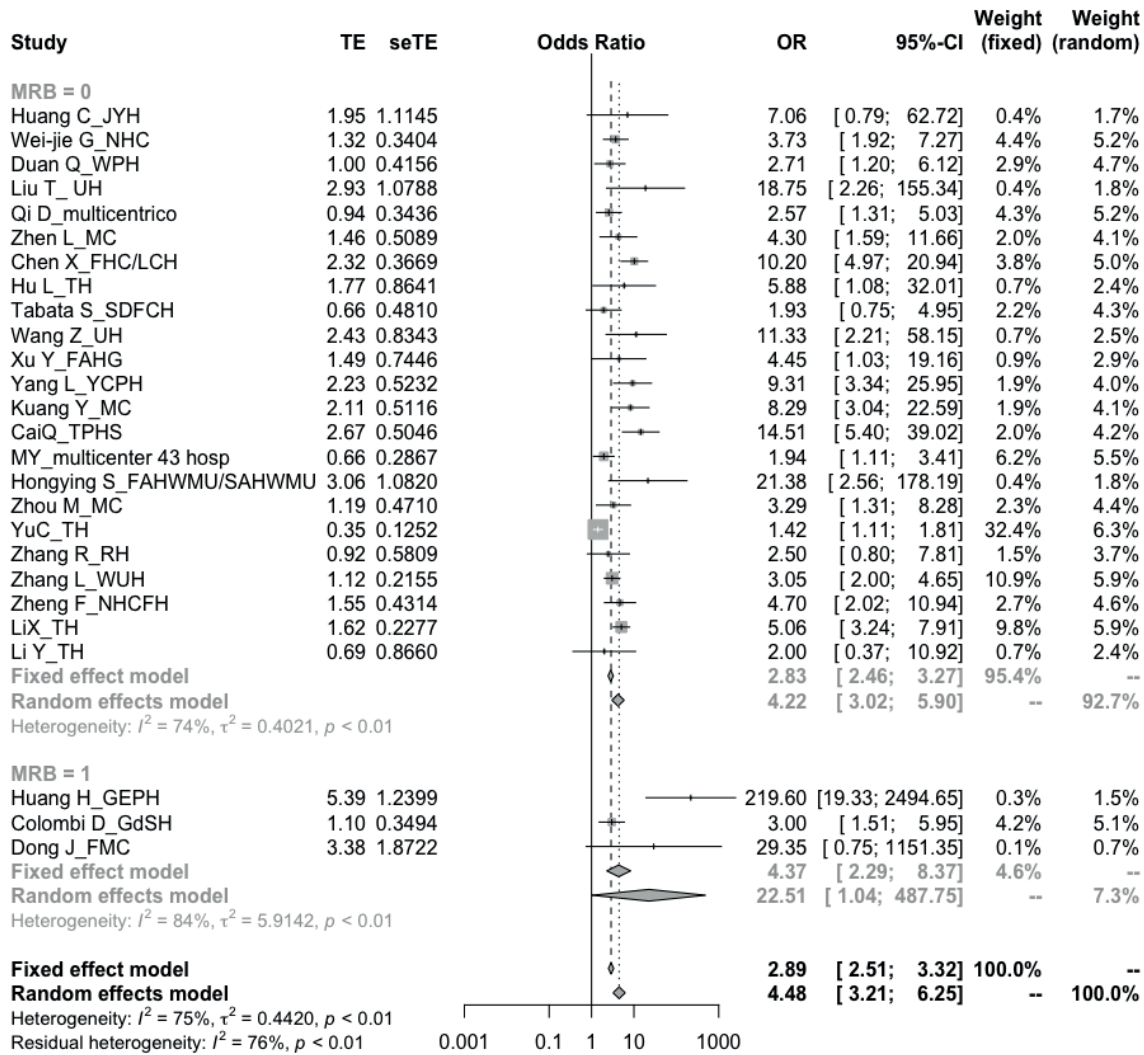

Candidate variable: LDH increase (per 1 U/L), outcome: severe Covid-19 disease, subgroup analysis by risk of bias (high vs moderate/low)

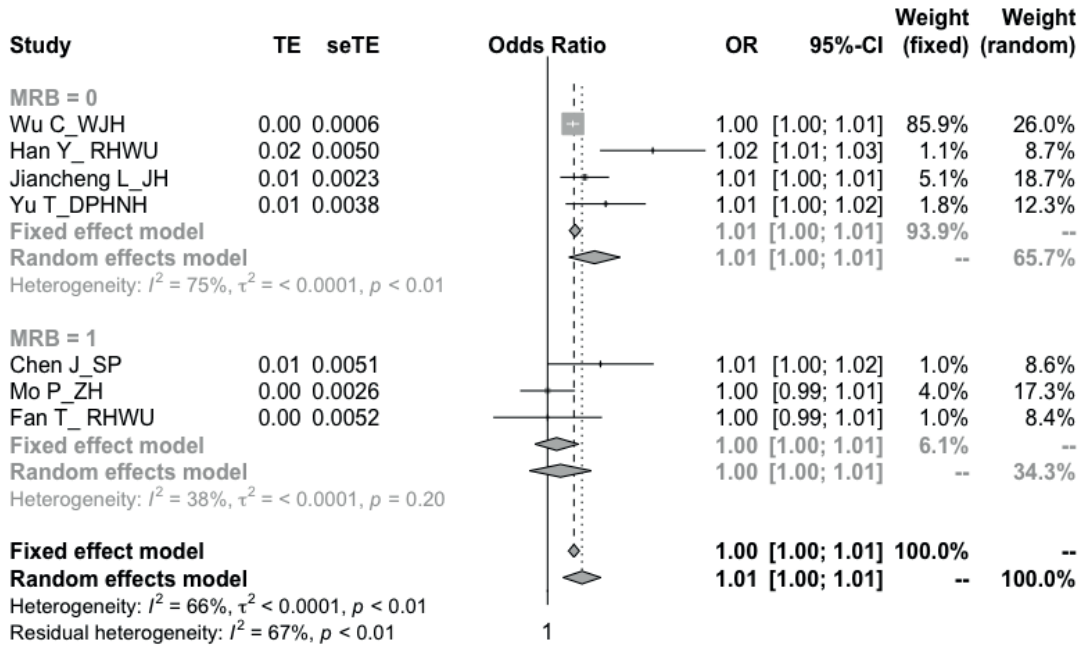

Candidate variable: High CK (more than 185-200 U/L), outcome: severe Covid-19 disease

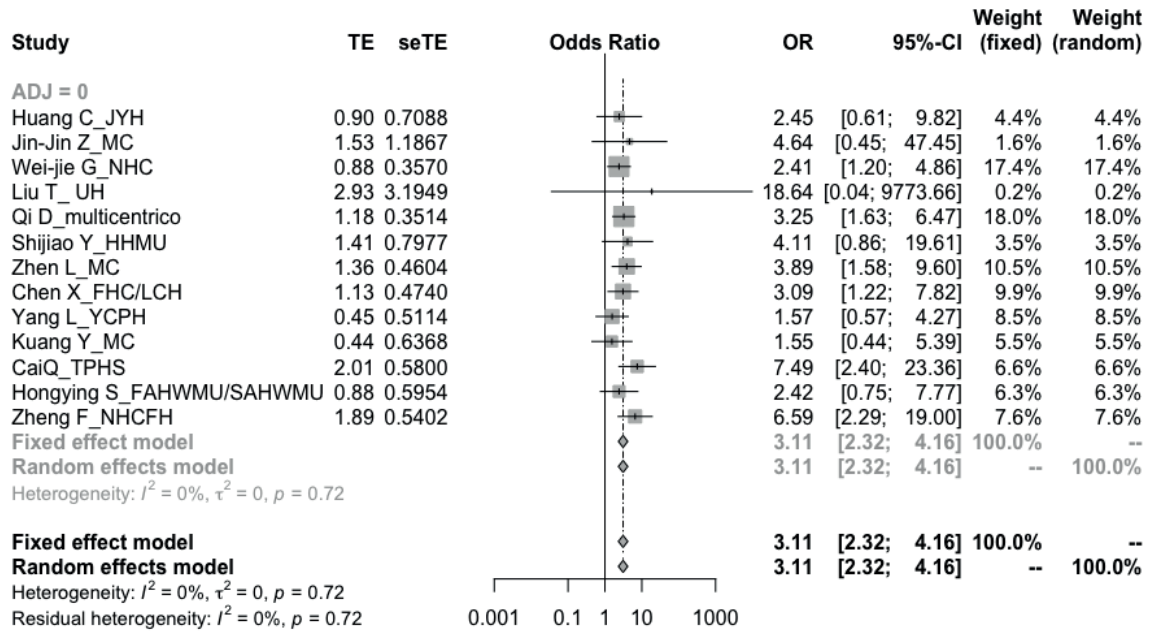



Candidate variable: Myocardial injury, outcome: severe Covid-19 disease, subgroup analysis by risk of bias (high vs moderate/low)

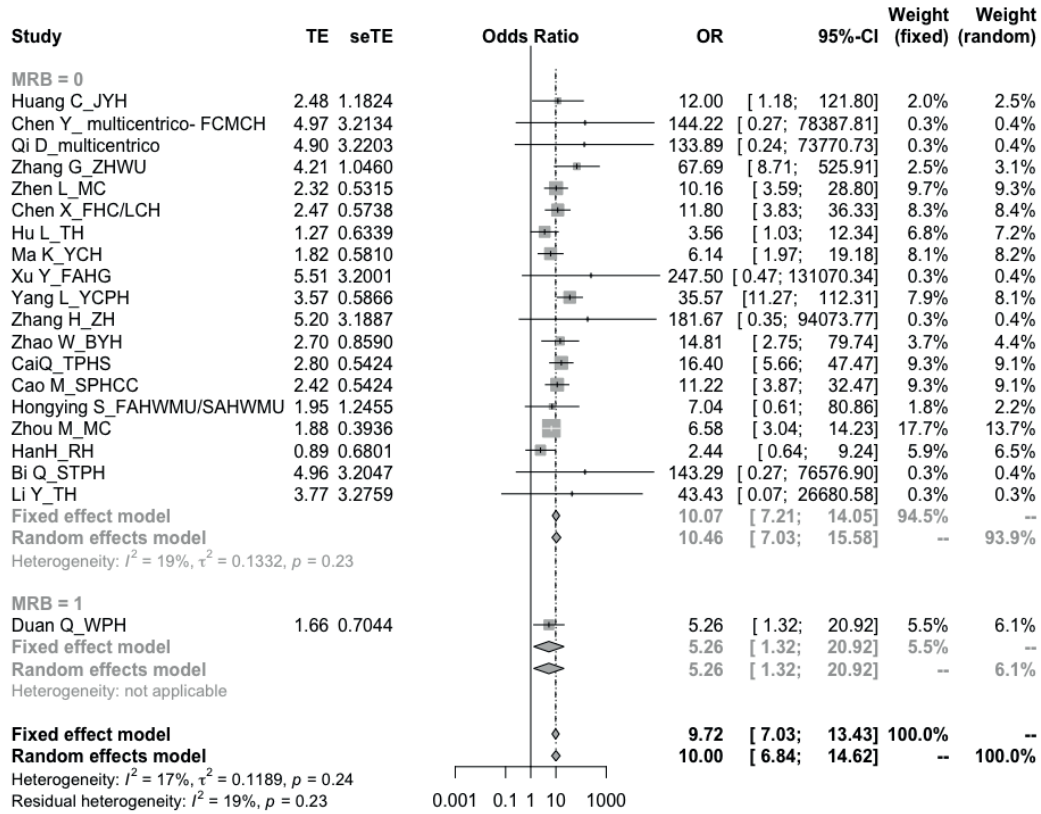

Candidate variable: High CK-MB (more than 25 U/L), outcome: severe Covid-19 disease, subgroup analysis: (crude vs adjusted)

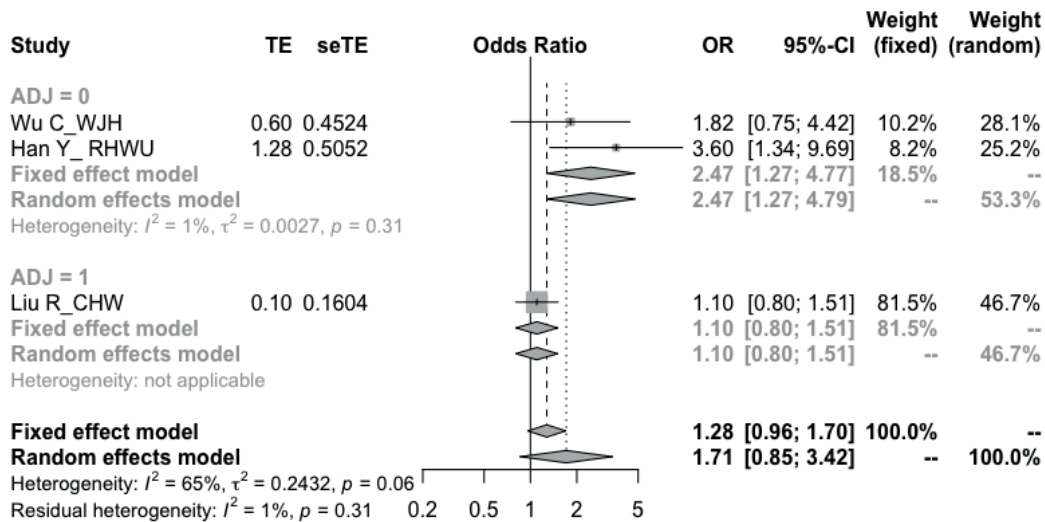

Candidate variable: High BNP (more than 500-900 pg/mL), outcome: severe Covid-19 disease

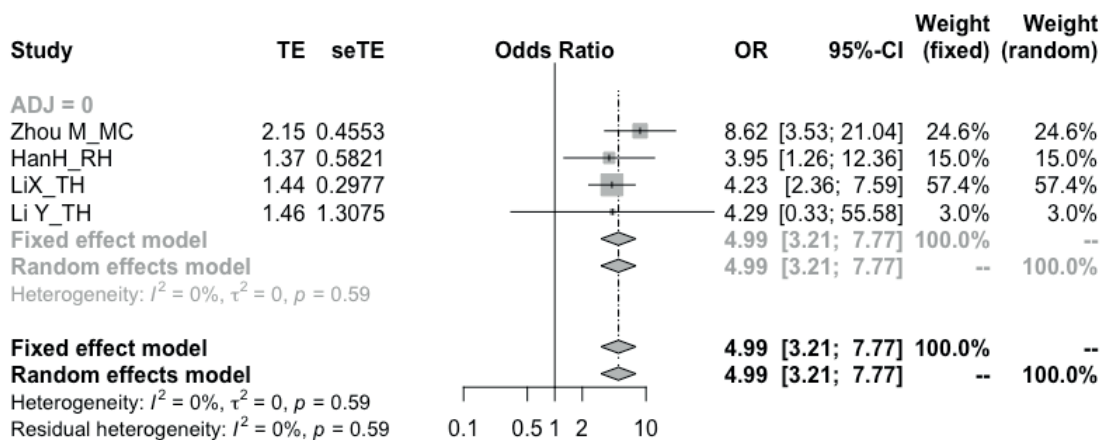

Candidate variable: Urea increase (per 1 mmol/L), outcome: severe Covid-19 disease

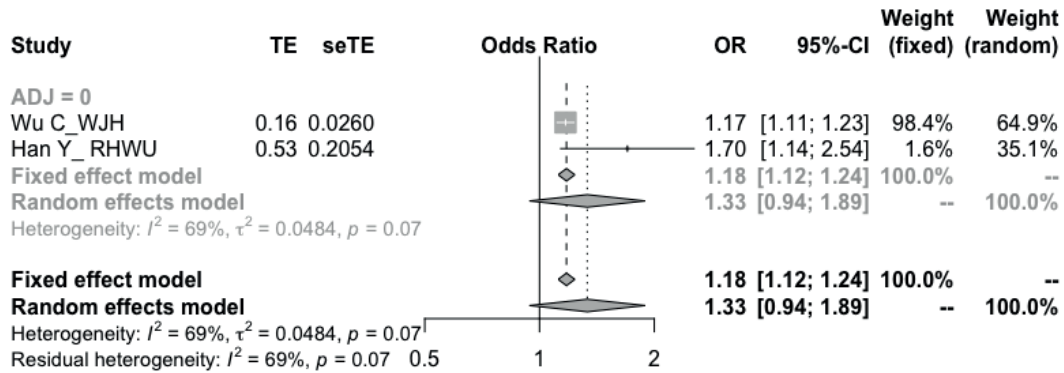

Candidate variable: High D-dimer (more than 500-1000 ng/ml), outcome: severe Covid-19 disease, subgroup analysis by risk of bias (high vs moderate/low)

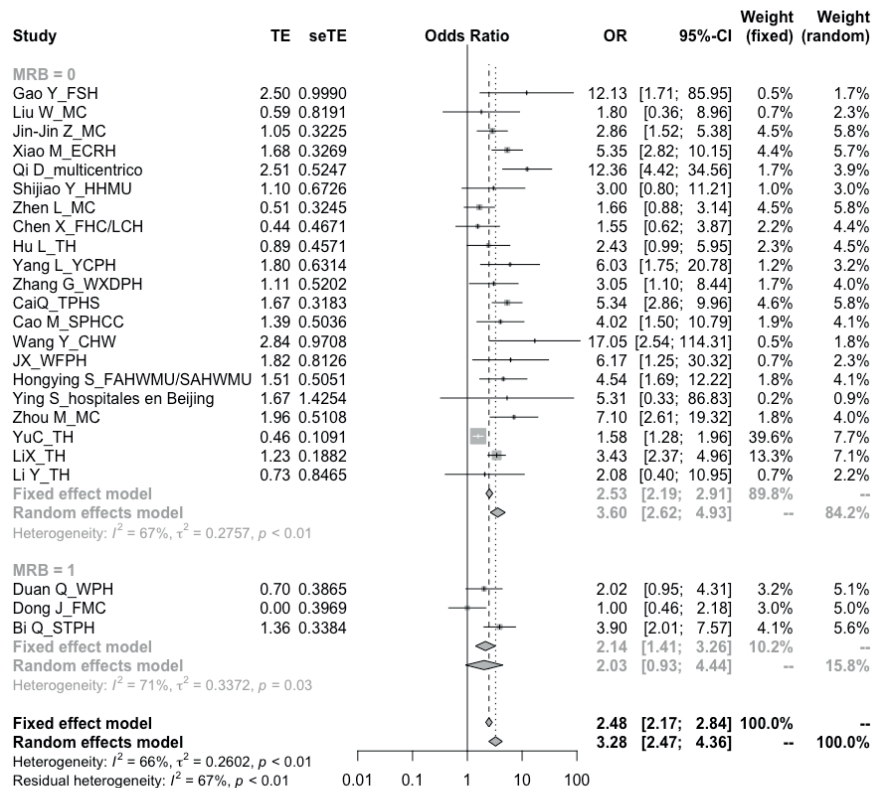

Candidate variable: Prolonged PT, outcome: severe Covid-19 disease

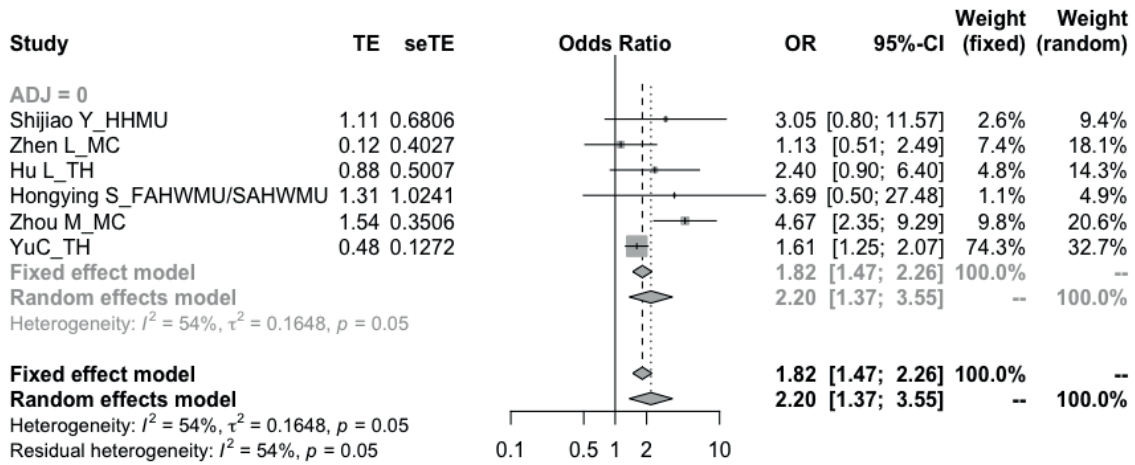

Candidate variable: Increase PT (per 1 second), outcome: severe Covid-19 disease

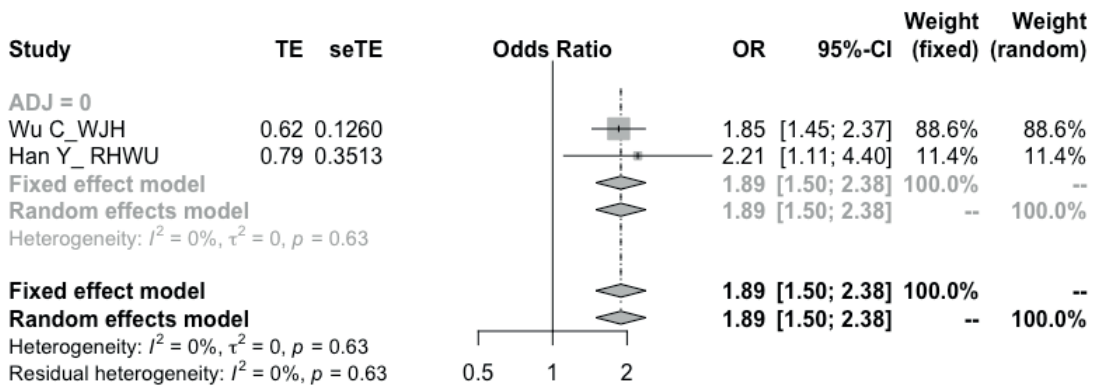

Candidate variable: Prolonged APTT time, outcome: severe Covid-19 disease

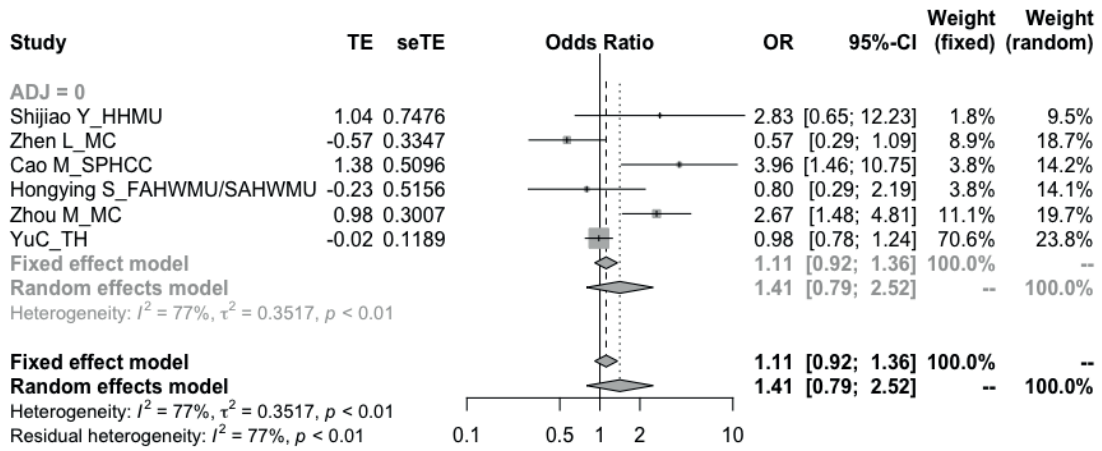

Candidate variable: Increase APTT time (per 1 second), outcome: severe Covid-19 disease

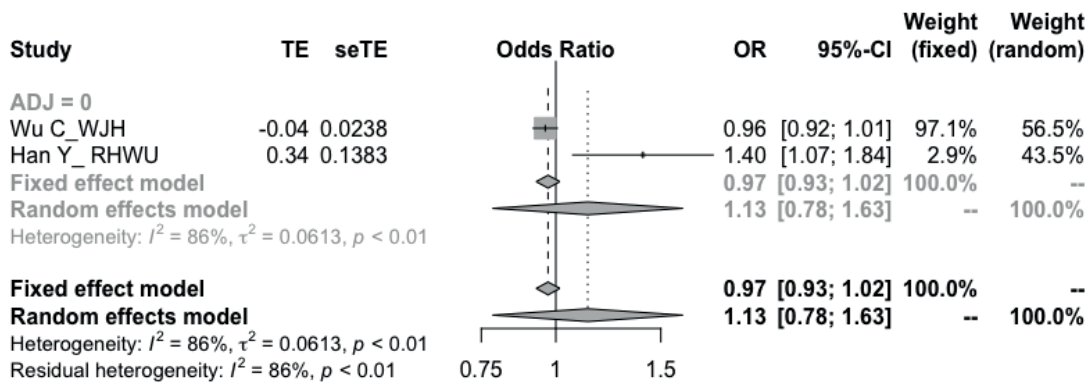

Candidate variable: High ferritin (more than 300-500 ng/mL), outcome: severe Covid-19 disease

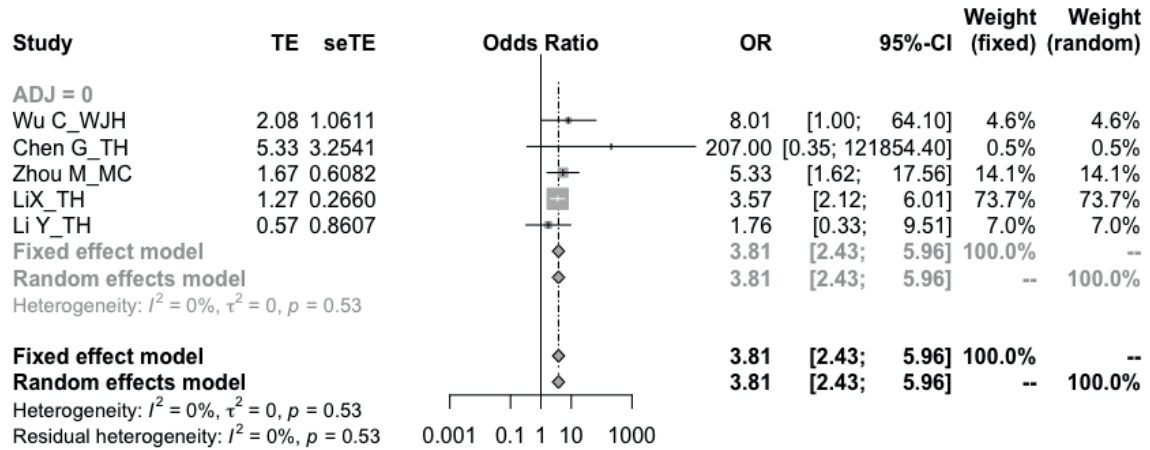



Candidate variable: High CRP (More than 1-100 mg/l) outcome: severe Covid-19 disease, subgroup analysis by risk of bias (high vs moderate/low)

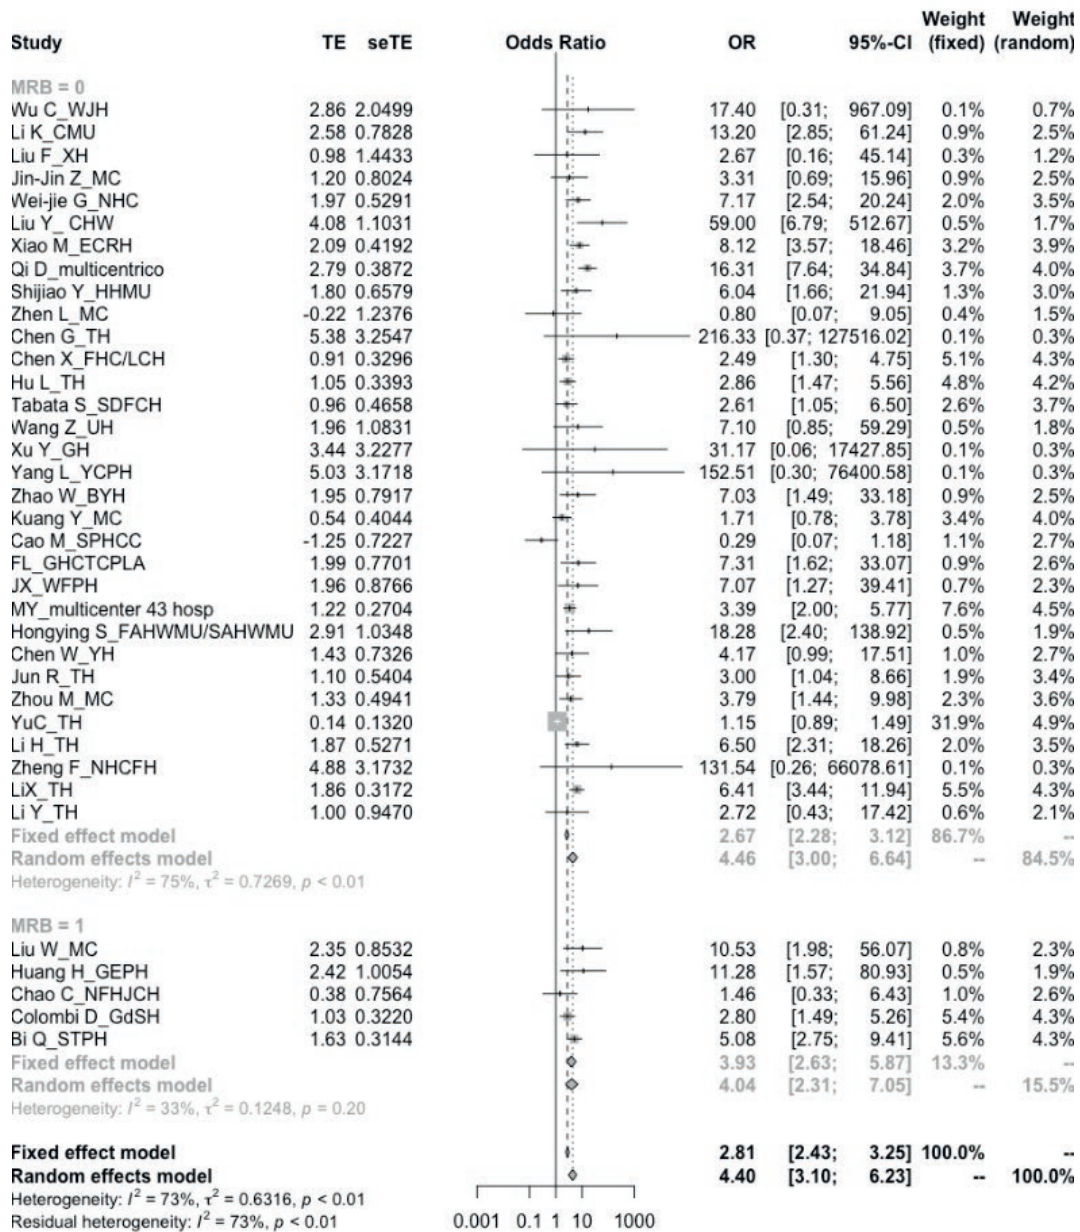

Candidate variable: CRP increase (per 1 mg/L), outcome: severe Covid-19 disease, subgroup analysis by risk of bias (high vs moderate/low)

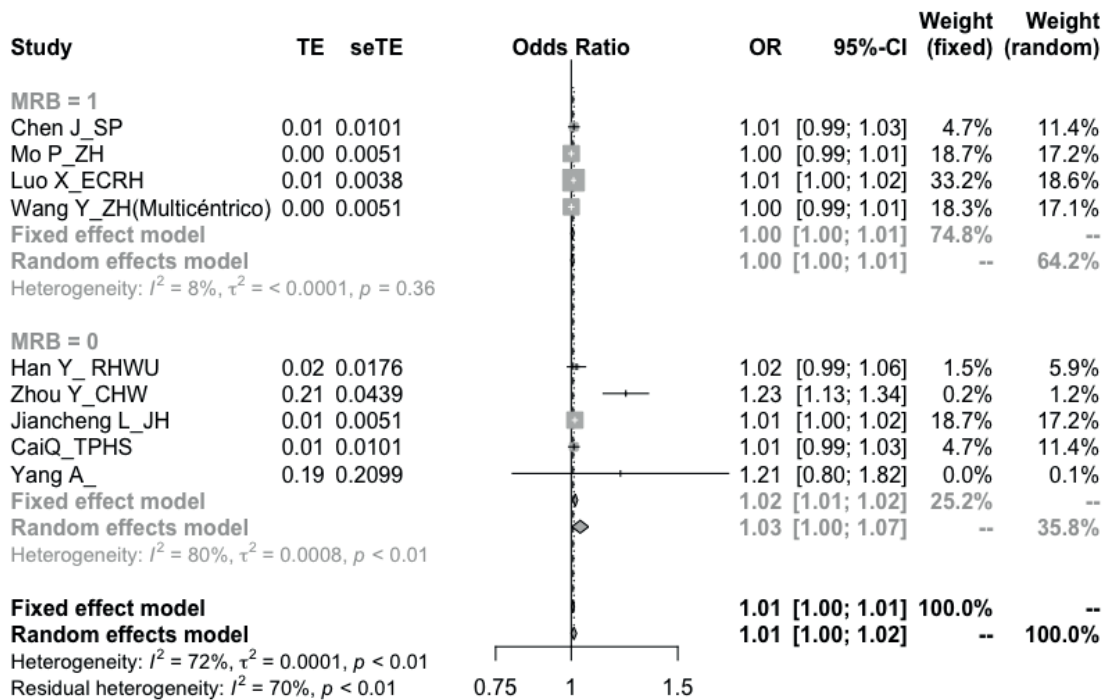

Candidate variable: High ESR (more than 10-20 mm/H), outcome: severe Covid-19 disease

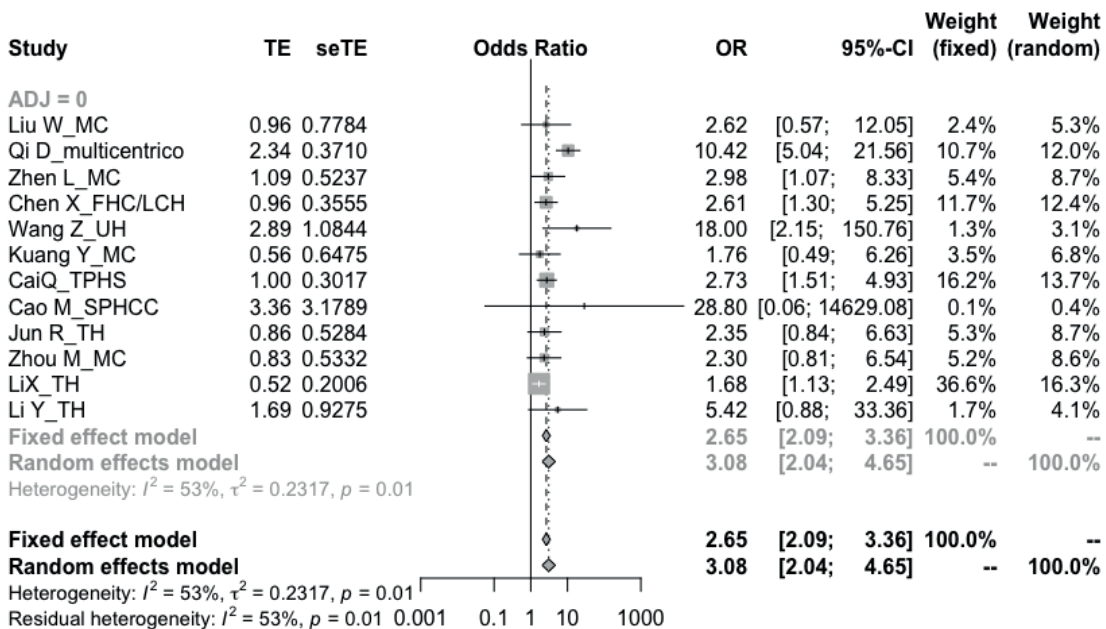

Candidate variable: ESR increase (per 1 mm/H), outcome: severe Covid-19 disease

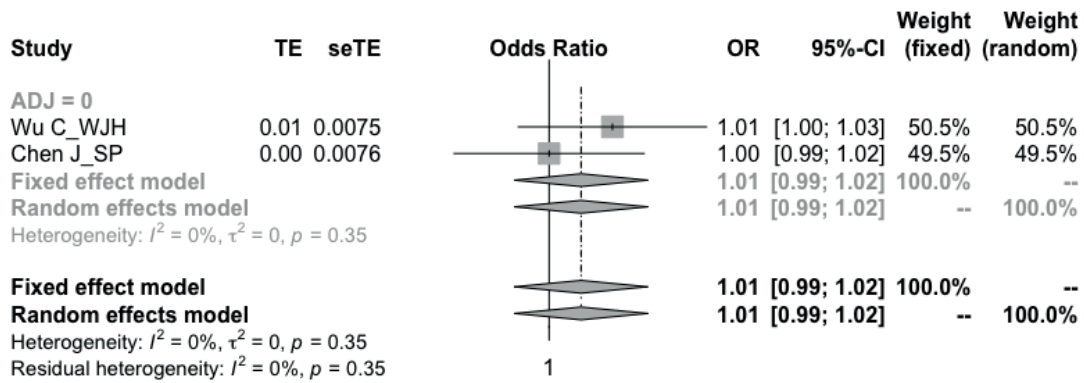

Candidate variable: IL-6 increase (per 1 pg/mL), outcome: severe Covid-19 disease, subgroup analysis: (crude vs adjusted)

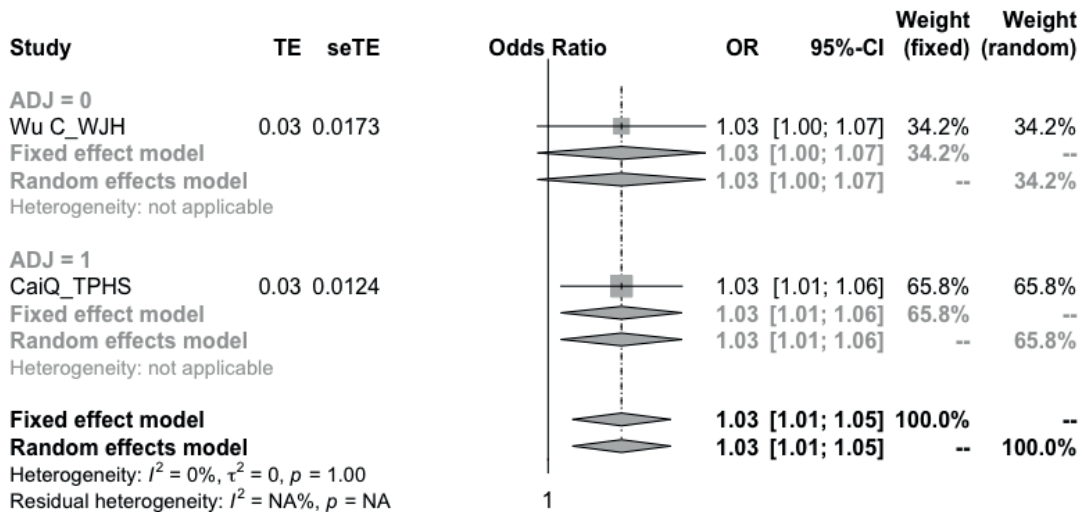

Candidate variable: High interleukin-6 (more than 5-20 pg/ml), outcome: severe Covid-19 disease, subgroup analysis: (crude vs adjusted)

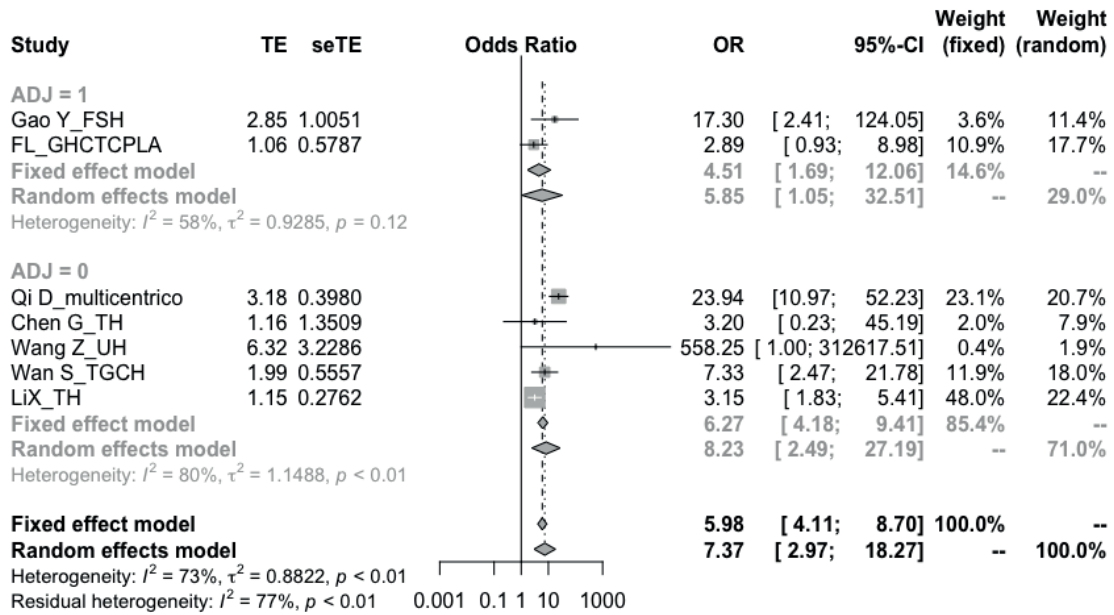

Candidate variable: High procalcitonin (more than 0.01-05 ng/ml),  
 outcome: severe Covid-19 disease, subgroup analysis: (crude vs adjusted)

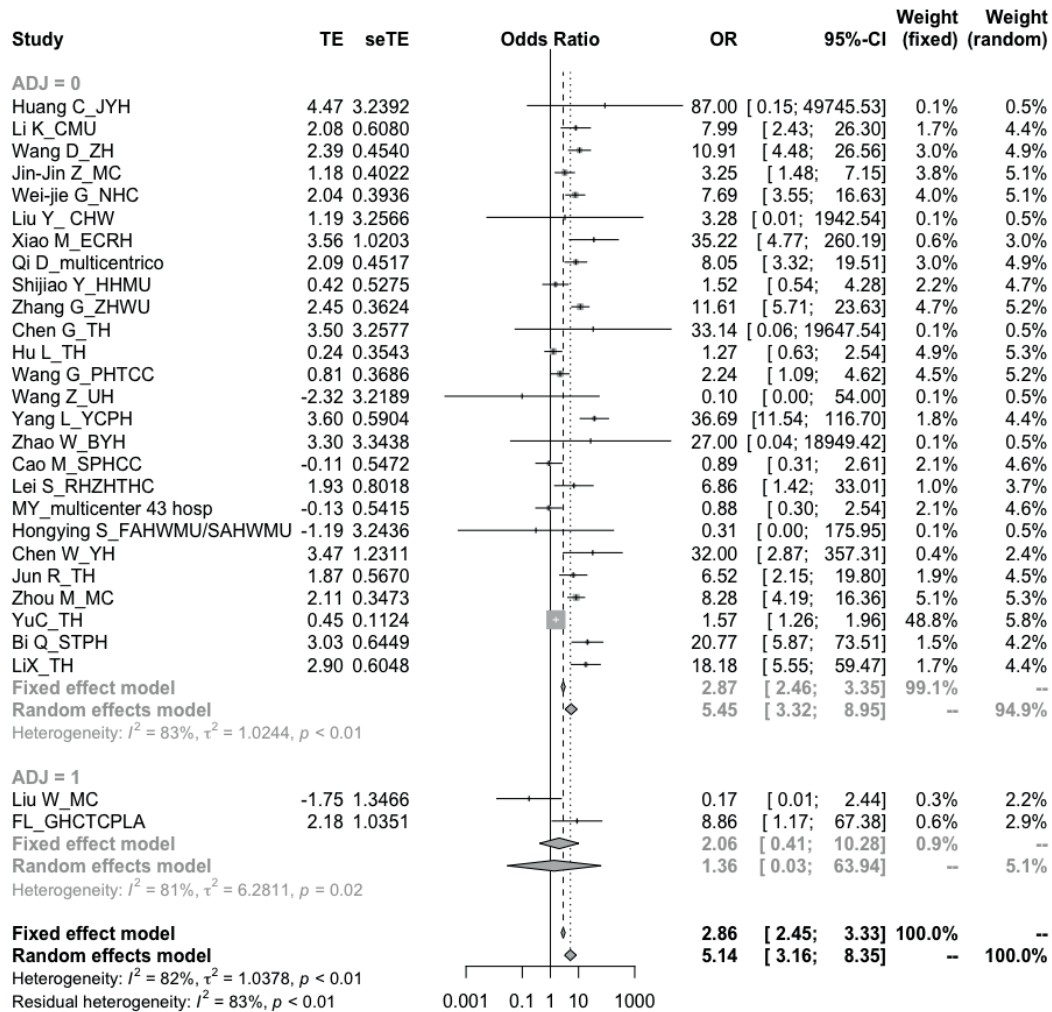

Candidate variable: High total bilirubin (more than 17-21pg/ml), outcome: severe Covid-19 disease

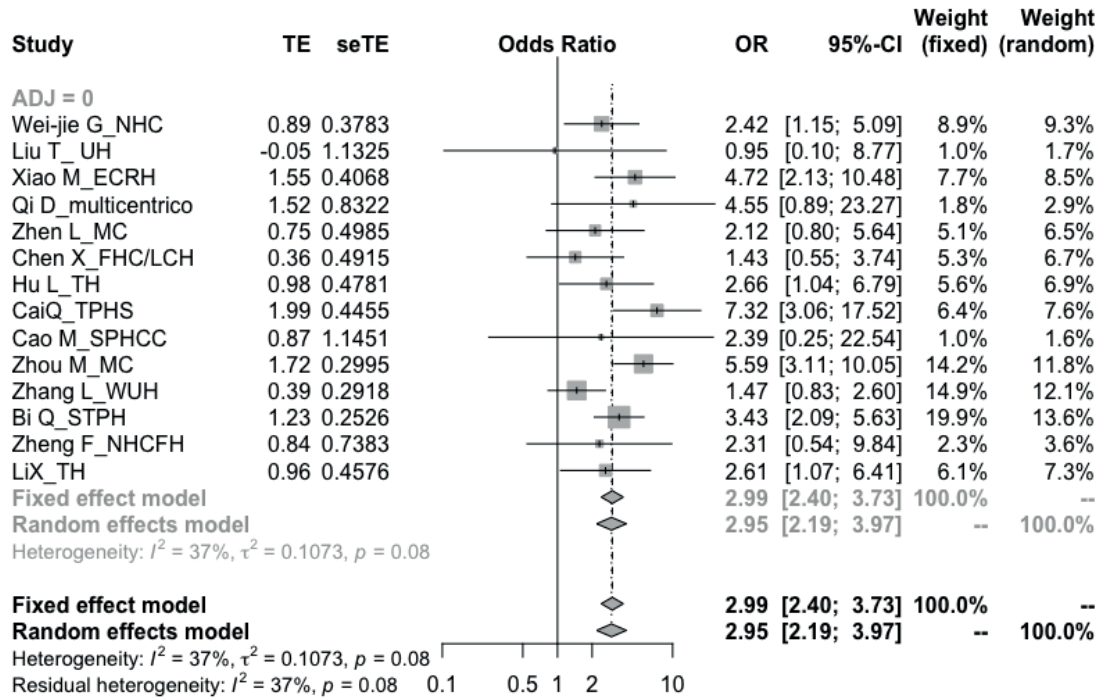



Candidate variable: High AST level (more than 32-40 U/l), outcome: severe Covid-19 disease

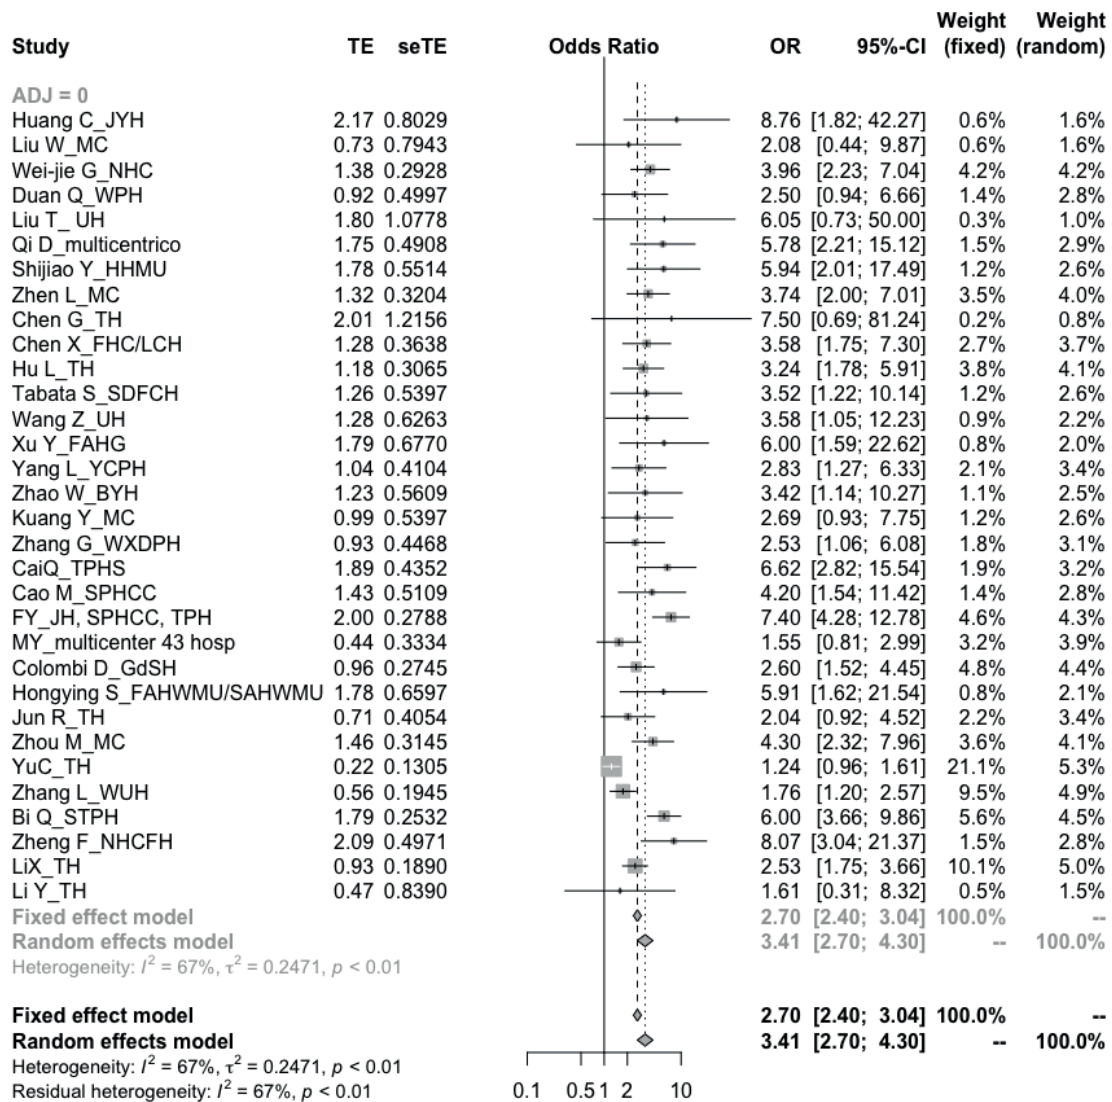

Candidate variable: AST increase (per 1 U/), outcome: severe Covid-19 disease, subgroup analysis by risk of bias (high vs moderate/low)

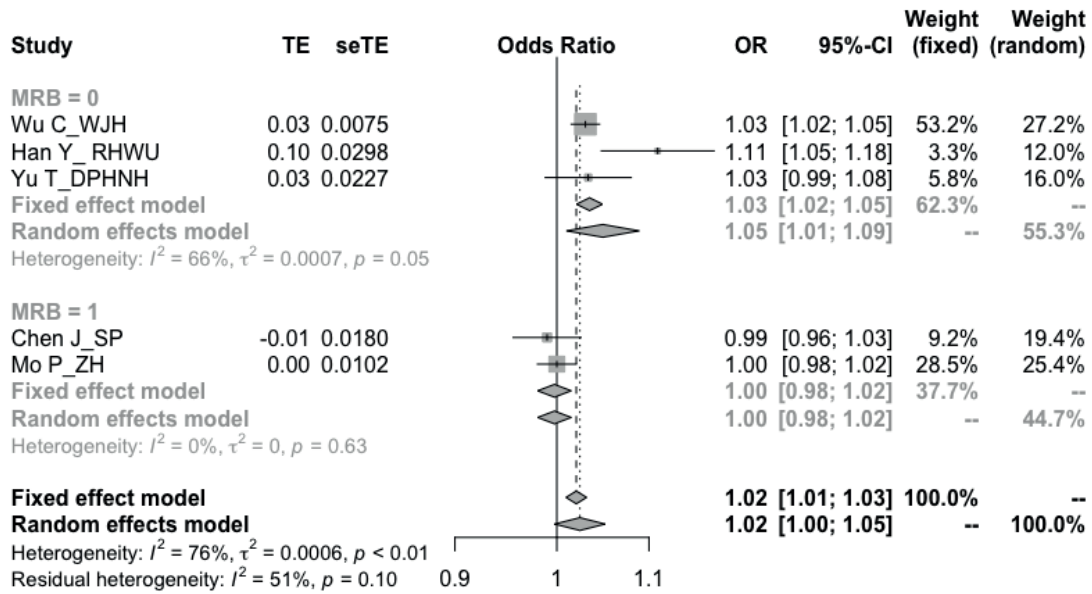

Candidate variable: High ALT level (more than 35-50 U/L), outcome: severe Covid-19 disease, subgroup analysis: (crude vs adjusted)

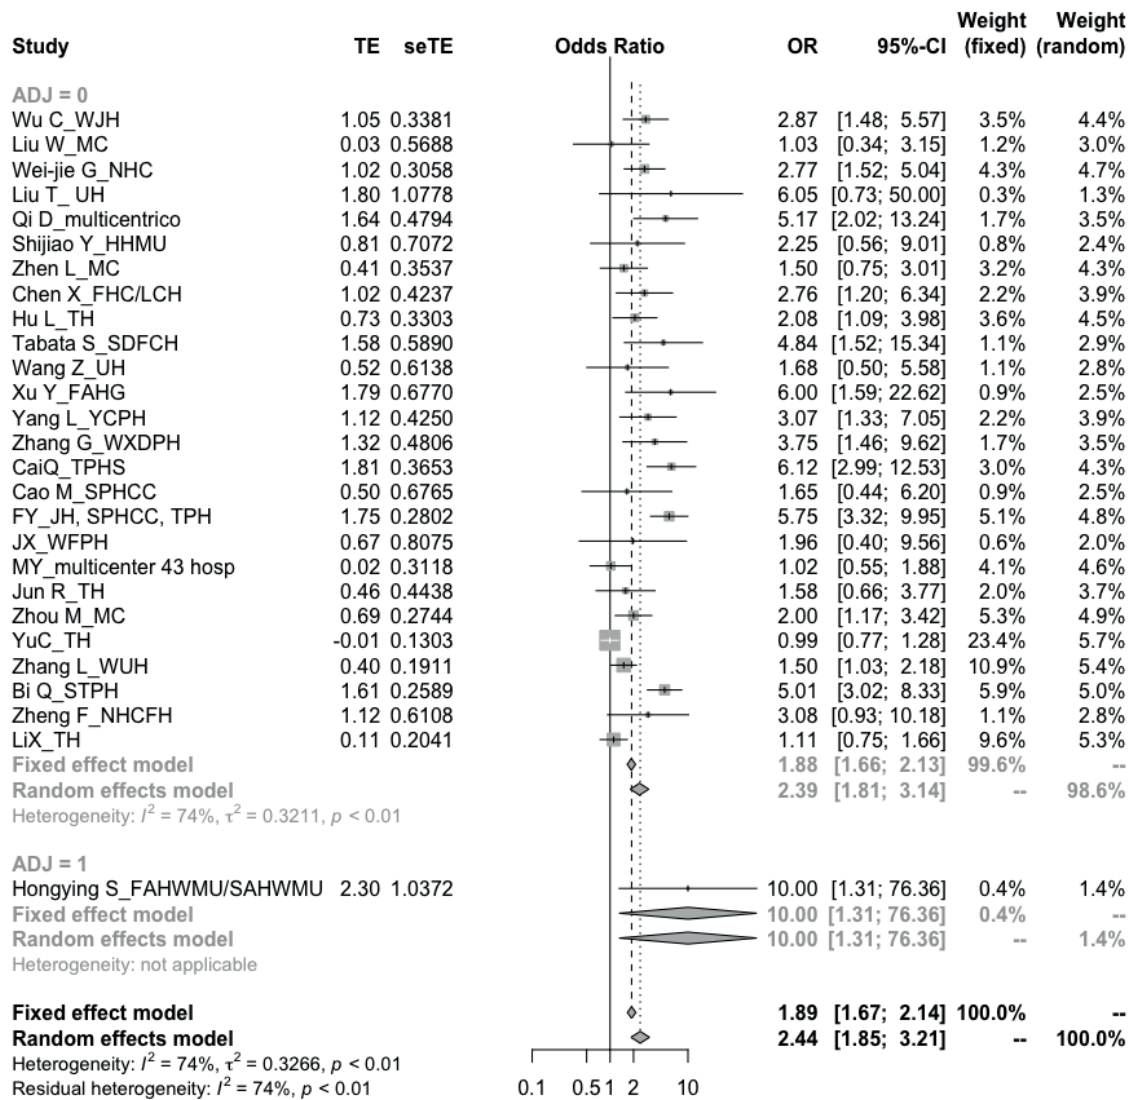

Candidate variable: Increase ALT level (per 1 U/L), outcome: severe Covid-19 disease

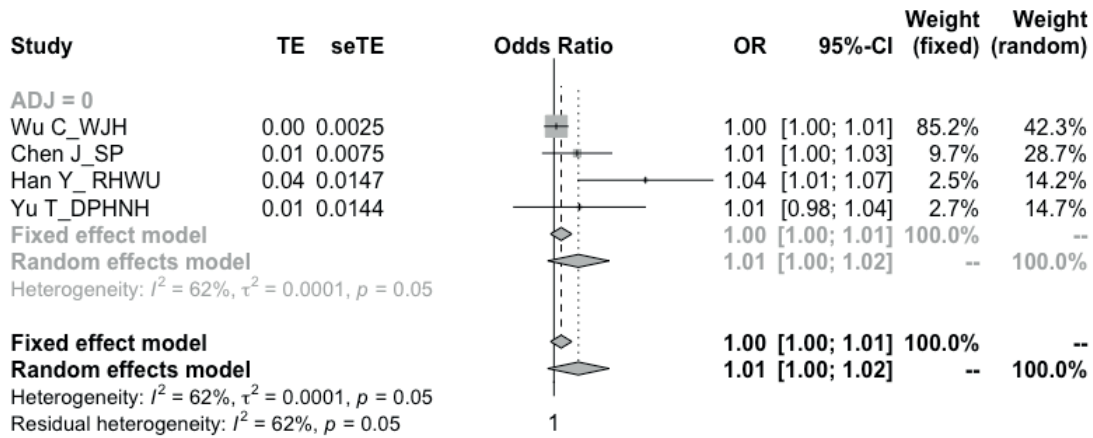

Candidate variable: Low albumin (less than 35-40 g/L), outcome: severe Covid-19 disease, subgroup analysis: (crude vs adjusted)

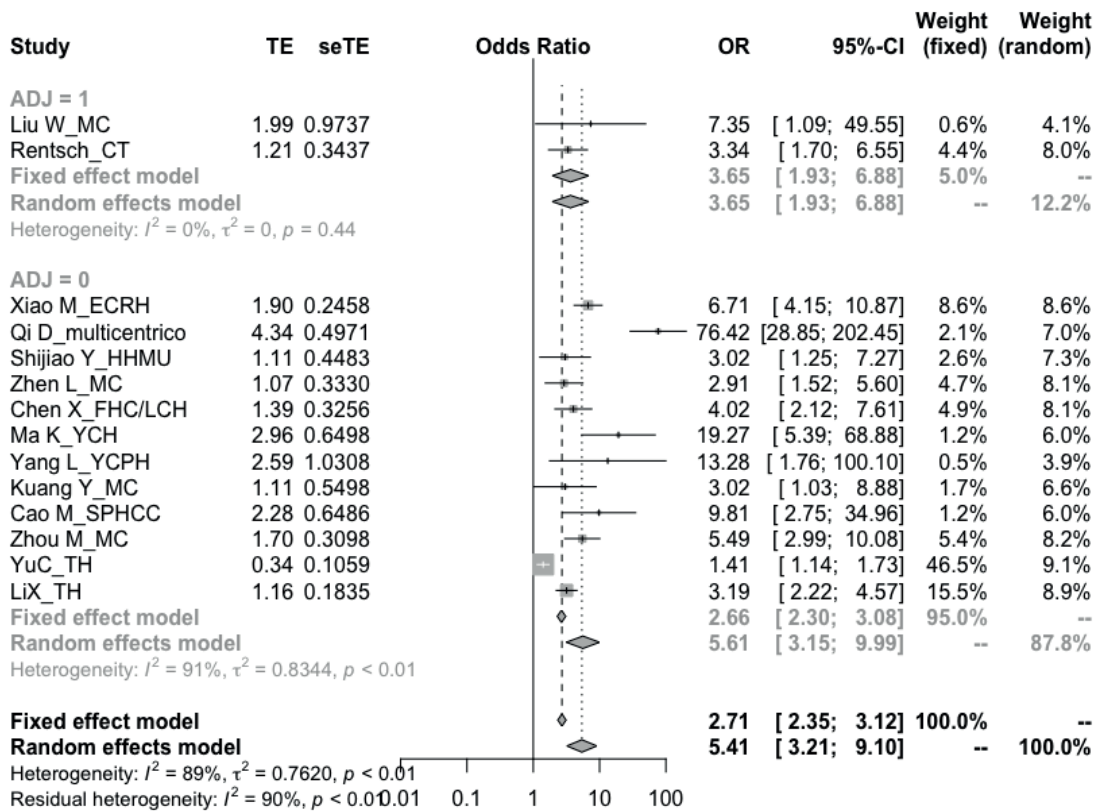

Candidate variable: Increase albumin (per 10 g/L), outcome: severe Covid-19 disease, subgroup analysis: (crude vs adjusted)

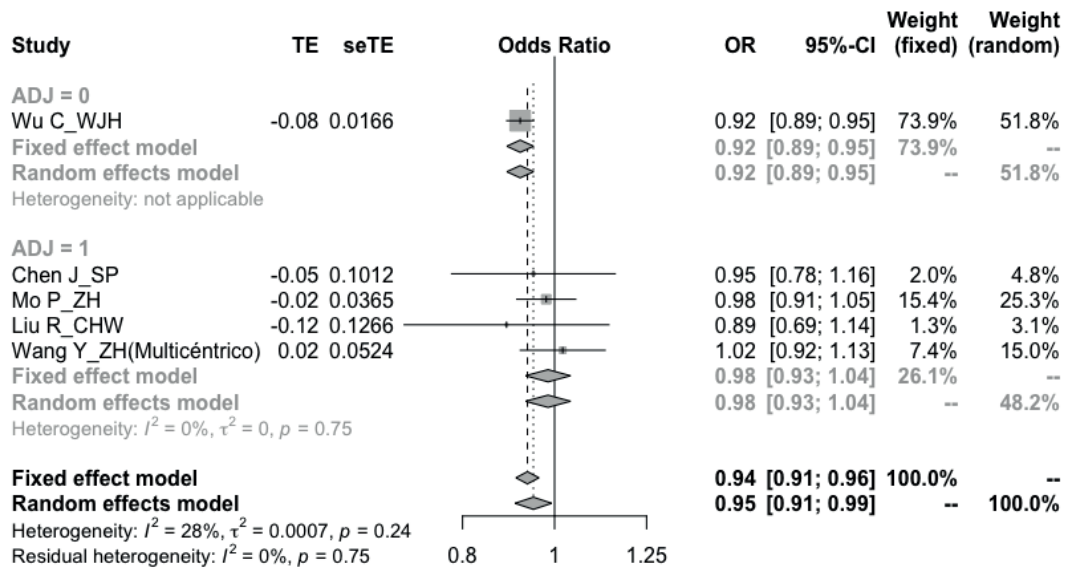

Candidate variable: High glucose (more than 6 mmol/l), outcome: severe Covid-19 disease

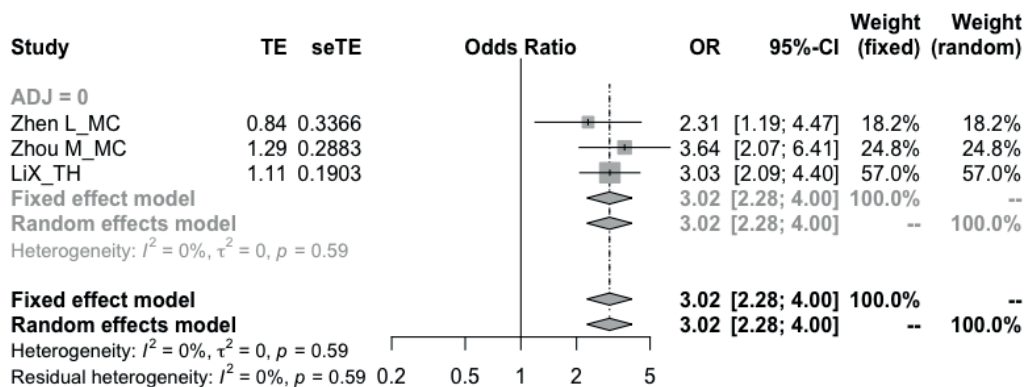

Candidate variable: High lactate (more than 1.5-2.2 mmol/L), outcome: severe Covid-19 disease

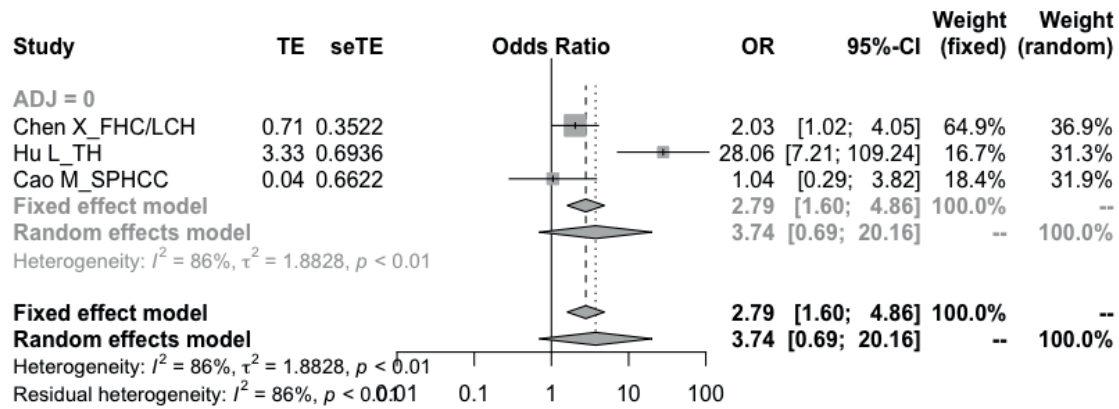

Candidate variable: Lactate increase (per 1 mmol/L), outcome: severe Covid-19 disease

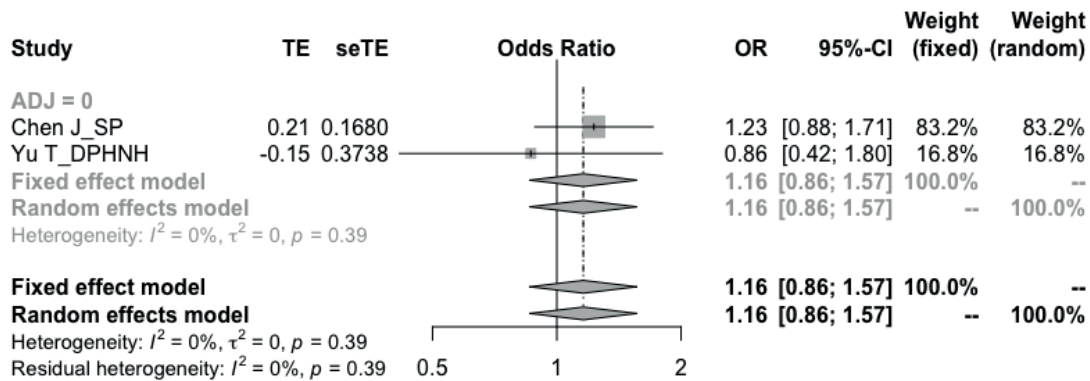



Candidate variable: Any abnormal Radiologic finding, outcome: severe Covid-19 disease

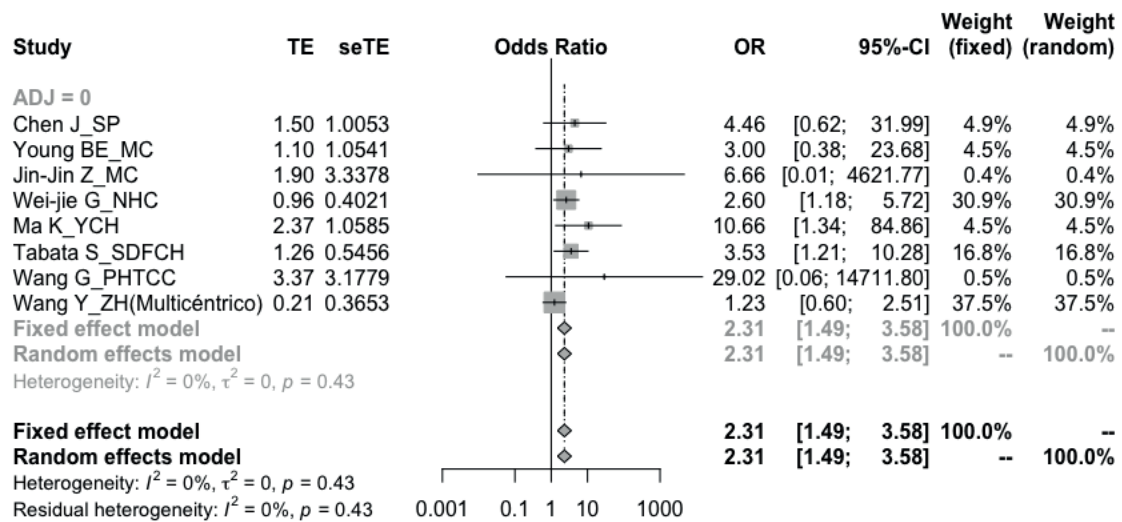

Candidate variable: Interstitial pattern, outcome: severe Covid-19 disease

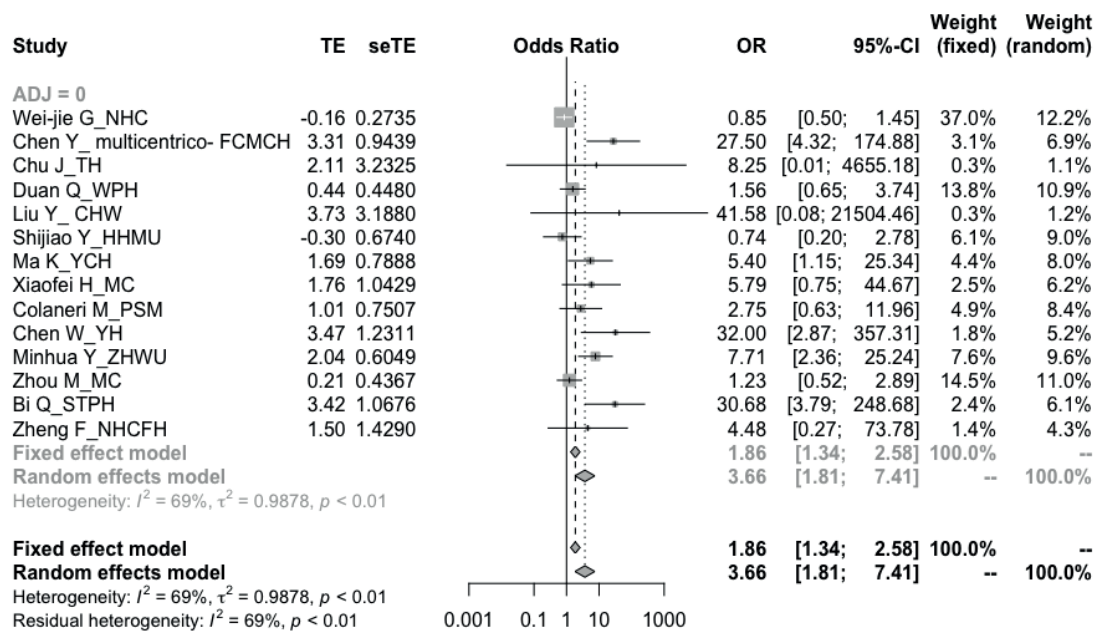

Candidate variable: Ground glass opacity, outcome: severe Covid-19 disease, subgroup analysis: (crude vs adjusted)

| Study                                                        | TE    | seTE   | Odds Ratio | OR    | 95%-CI           | (fixed) | (random) |
|--------------------------------------------------------------|-------|--------|------------|-------|------------------|---------|----------|
| <b>ADJ = 0</b>                                               |       |        |            |       |                  |         |          |
| Li K_CMU                                                     | 2.14  | 3.2533 |            | 8.48  | [0.01; 4985.36]  | 0.0%    | 0.3%     |
| Liu K_MC                                                     | 0.79  | 0.5835 |            | 2.21  | [0.70; 6.92]     | 1.4%    | 3.7%     |
| Cao W_X-1 H                                                  | 0.73  | 0.5493 |            | 2.07  | [0.70; 6.07]     | 1.6%    | 3.9%     |
| Chu J_TH                                                     | 0.51  | 0.7176 |            | 1.66  | [0.41; 6.79]     | 0.9%    | 3.0%     |
| Duan Q_WPH                                                   | 0.09  | 0.5878 |            | 1.10  | [0.35; 3.47]     | 1.4%    | 3.7%     |
| Liu T_UH                                                     | 1.61  | 3.2309 |            | 5.00  | [0.01; 2812.91]  | 0.0%    | 0.3%     |
| Shijiao Y_HHMMU                                              | 0.87  | 0.6019 |            | 2.38  | [0.73; 7.73]     | 1.3%    | 3.6%     |
| Zhao W_SXH                                                   | -0.71 | 0.5285 |            | 0.49  | [0.17; 1.39]     | 1.7%    | 4.0%     |
| Lei L_CUTGH                                                  | 0.43  | 1.1429 |            | 1.54  | [0.16; 14.49]    | 0.4%    | 1.7%     |
| Feng Z_TXH                                                   | 2.00  | 3.2006 |            | 7.38  | [0.01; 3909.80]  | 0.0%    | 0.3%     |
| Hu L_TH                                                      | -1.37 | 0.4576 |            | 0.25  | [0.10; 0.62]     | 2.3%    | 4.4%     |
| Li J_CHW                                                     | -0.68 | 0.5272 |            | 0.50  | [0.18; 1.42]     | 1.7%    | 4.0%     |
| Wang G_PHTCC                                                 | 1.54  | 0.4088 |            | 4.67  | [2.09; 10.40]    | 2.9%    | 4.7%     |
| Xiaofei H_MC                                                 | 1.02  | 0.5707 |            | 2.77  | [0.91; 8.49]     | 1.5%    | 3.8%     |
| Kuang Y_MC                                                   | -0.33 | 0.4766 |            | 0.72  | [0.28; 1.83]     | 2.1%    | 4.3%     |
| FY_JH, SPHCC, TPH                                            | -0.25 | 0.3925 |            | 0.78  | [0.36; 1.69]     | 3.1%    | 4.8%     |
| CM_FAHSYU                                                    | 1.09  | 0.5976 |            | 2.99  | [0.93; 9.64]     | 1.3%    | 3.6%     |
| JX_WFPH                                                      | 3.41  | 3.1987 |            | 30.35 | [0.06; 16029.59] | 0.0%    | 0.3%     |
| MY_multicenter 43 hosp                                       | 1.09  | 0.2959 |            | 2.98  | [1.67; 5.33]     | 5.5%    | 5.4%     |
| Hongying S_FAHWMU/SAHWMU                                     | -0.29 | 1.2435 |            | 0.75  | [0.07; 8.58]     | 0.3%    | 1.5%     |
| Xin L_CHWC/hospitales en Hunan                               | 2.69  | 3.1992 |            | 14.75 | [0.03; 7797.57]  | 0.0%    | 0.3%     |
| Ying S_hospitales en Beijing                                 | 3.73  | 3.1948 |            | 41.69 | [0.08; 21851.41] | 0.0%    | 0.3%     |
| Chen W_YH                                                    | 0.18  | 0.7170 |            | 1.20  | [0.29; 4.89]     | 0.9%    | 3.1%     |
| Wang X_DFH                                                   | -0.50 | 0.2155 |            | 0.60  | [0.40; 0.92]     | 10.4%   | 5.8%     |
| Herold T_UH                                                  | 0.50  | 1.2142 |            | 1.65  | [0.15; 17.82]    | 0.3%    | 1.5%     |
| Minhua Y_ZHWU                                                | -0.61 | 0.5929 |            | 0.54  | [0.17; 1.74]     | 1.4%    | 3.7%     |
| Zhou M_MC                                                    | 1.74  | 0.3689 |            | 5.67  | [2.75; 11.69]    | 3.5%    | 5.0%     |
| YuC_TH                                                       | -0.17 | 0.1003 |            | 0.85  | [0.70; 1.03]     | 47.8%   | 6.3%     |
| Zhang R_RH                                                   | 1.50  | 1.0633 |            | 4.46  | [0.56; 35.86]    | 0.4%    | 1.9%     |
| Bi Q_STPH                                                    | 2.33  | 1.0220 |            | 10.33 | [1.39; 76.54]    | 0.5%    | 2.0%     |
| Zheng F_NHCFH                                                | 0.80  | 0.4250 |            | 2.23  | [0.97; 5.12]     | 2.7%    | 4.6%     |
| <b>Fixed effect model</b>                                    |       |        |            | 1.08  | [0.94; 1.24]     | 97.7%   | --       |
| <b>Random effects model</b>                                  |       |        |            | 1.47  | [1.04; 2.08]     | --      | 95.6%    |
| Heterogeneity: $I^2 = 70\%$ , $\tau^2 = 0.4636$ , $p < 0.01$ |       |        |            |       |                  |         |          |
| <b>ADJ = 1</b>                                               |       |        |            |       |                  |         |          |
| Tabata S_SDFCH                                               | 1.09  | 0.4571 |            | 2.97  | [1.21; 7.27]     | 2.3%    | 4.4%     |
| <b>Fixed effect model</b>                                    |       |        |            | 2.97  | [1.21; 7.27]     | 2.3%    | --       |
| <b>Random effects model</b>                                  |       |        |            | 2.97  | [1.21; 7.27]     | --      | 4.4%     |
| Heterogeneity: not applicable                                |       |        |            |       |                  |         |          |
| <b>Fixed effect model</b>                                    |       |        |            | 1.11  | [0.97; 1.27]     | 100.0%  | --       |
| <b>Random effects model</b>                                  |       |        |            | 1.52  | [1.08; 2.13]     | --      | 100.0%   |
| Heterogeneity: $I^2 = 70\%$ , $\tau^2 = 0.4703$ , $p < 0.01$ |       |        |            |       |                  |         |          |

Candidate variable: Crazy paving pattern, outcome: severe Covid-19 disease, subgroup analysis: (crude vs adjusted)

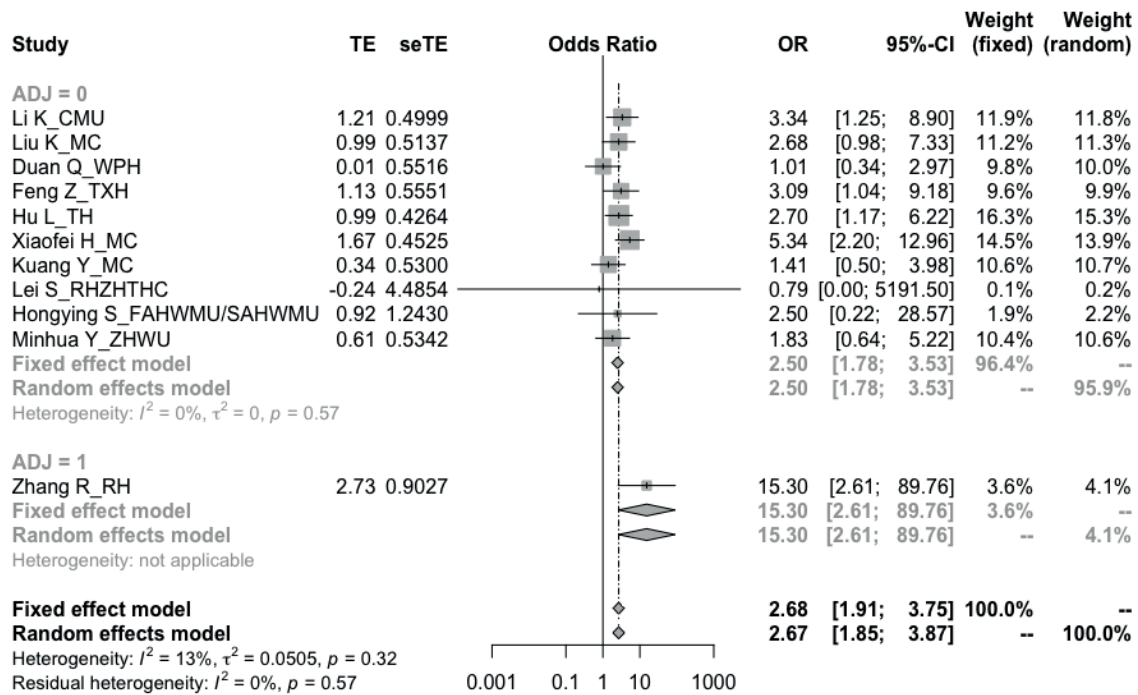

Candidate variable: Consolidation pattern, outcome: severe Covid-19 disease, subgroup analysis: (crude vs adjusted)

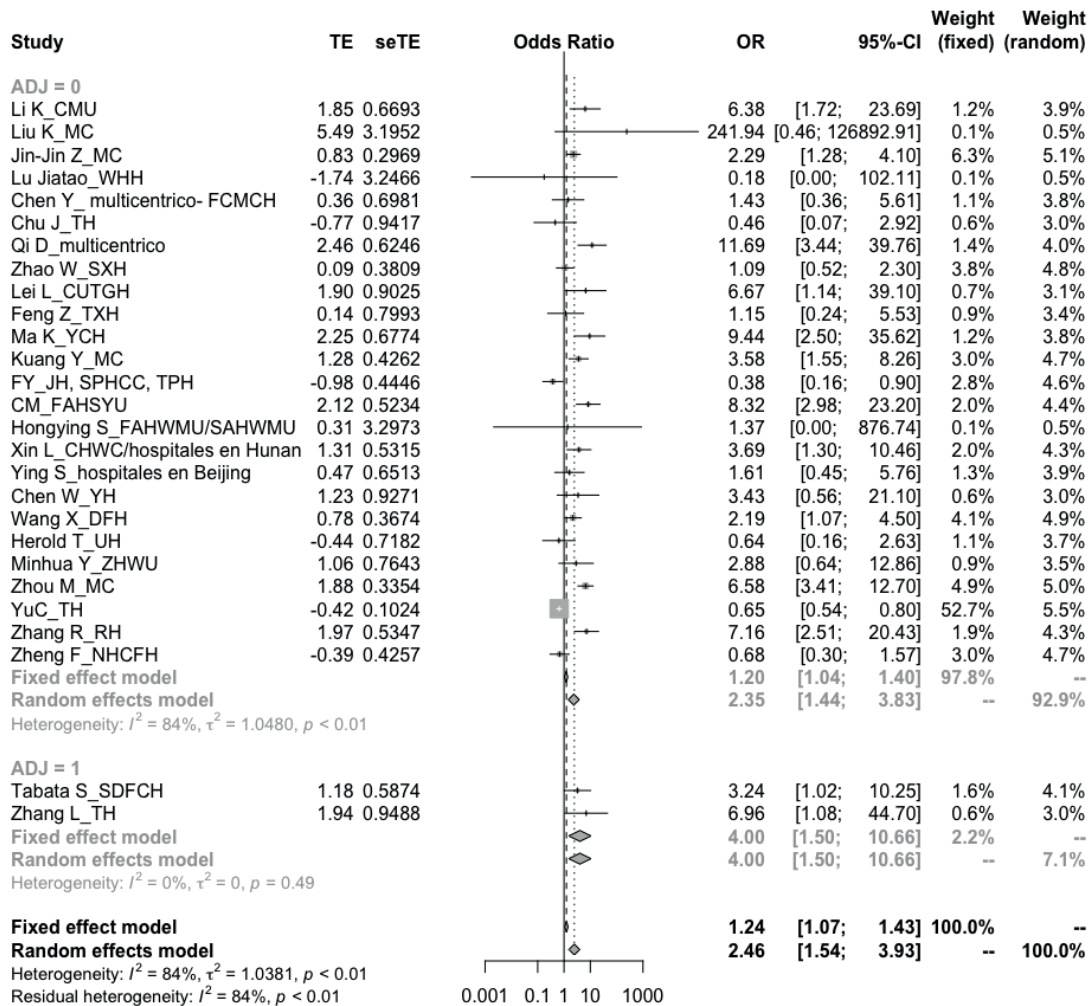

Candidate variable: Enlarged lymph nodes (CT assessment), outcome: severe Covid-19 disease

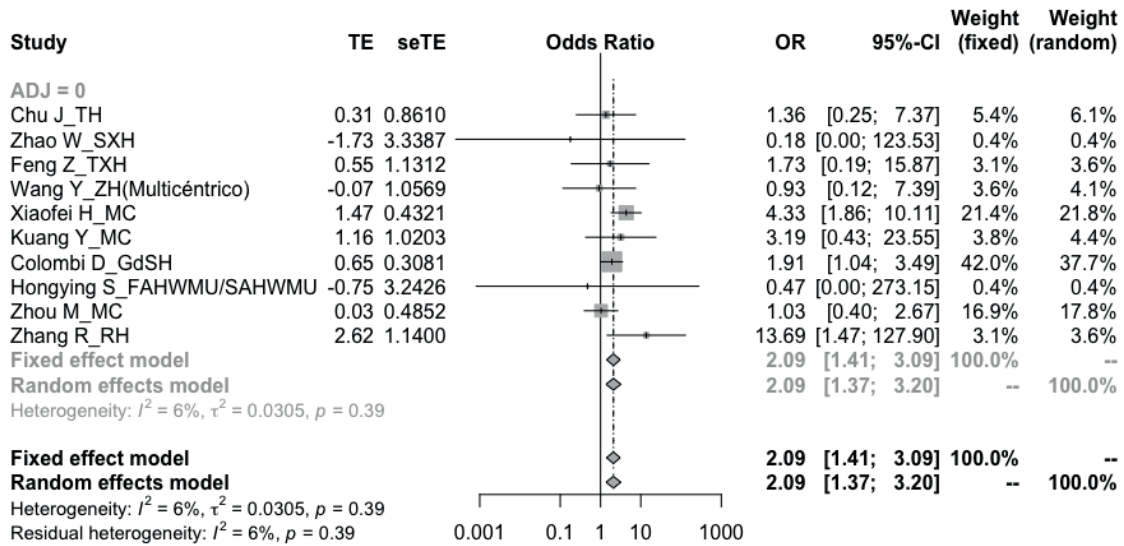

Candidate variable: Pleural effusion (CT assessment), outcome: severe Covid-19 disease, subgroup analysis: (crude vs adjusted)

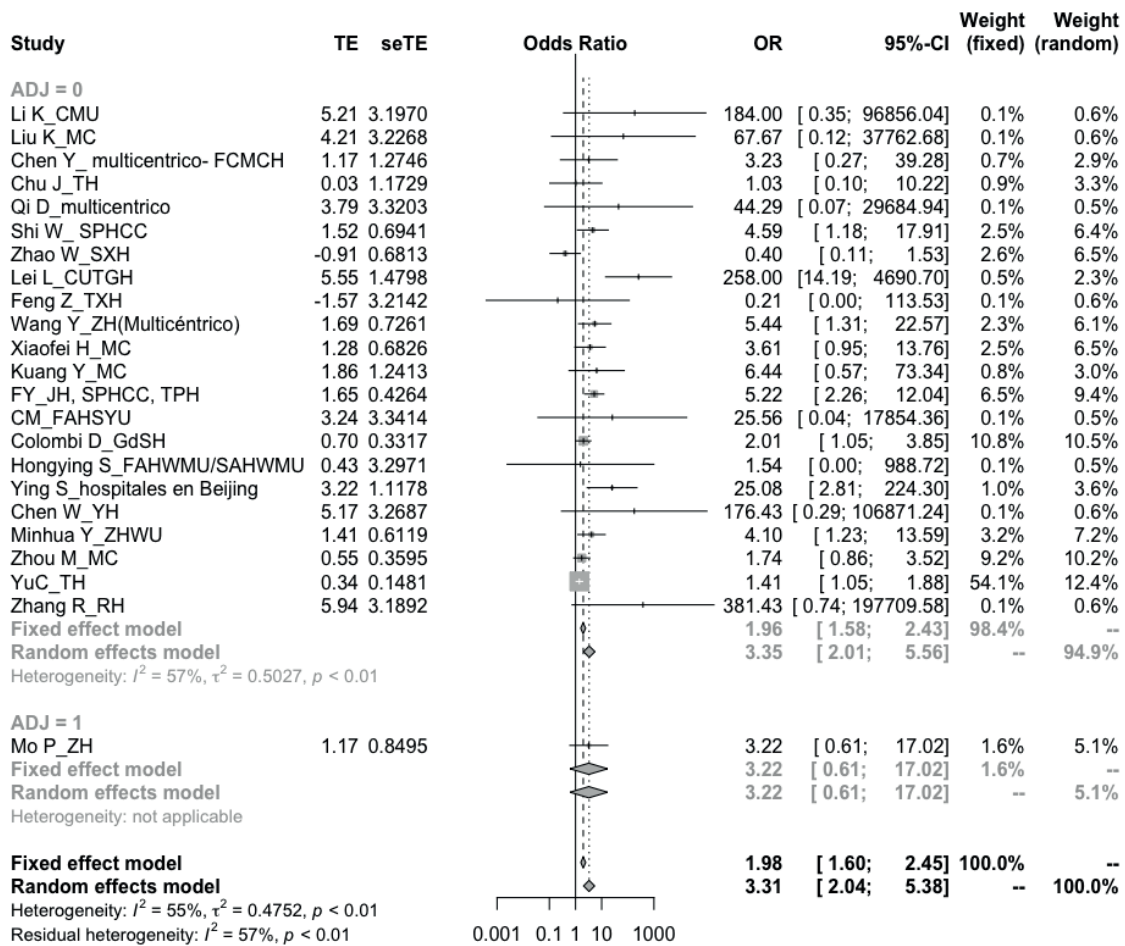



Candidate variable: Bilateral compromise (CT assesment), outcome: severe Covid-19 disease

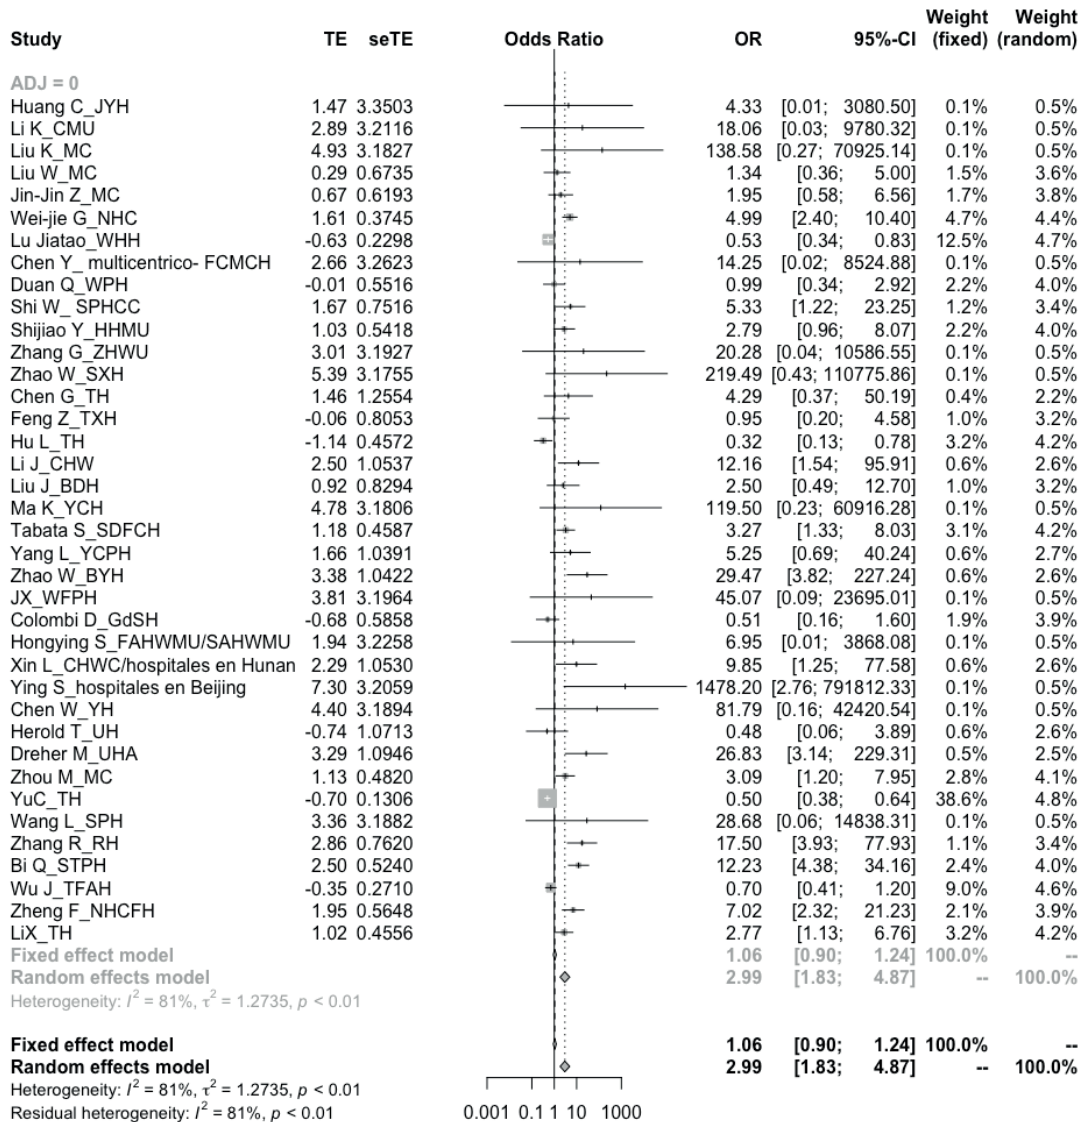

Candidate variable: High APACHE score (more than 8), outcome: severe Covid-19 disease

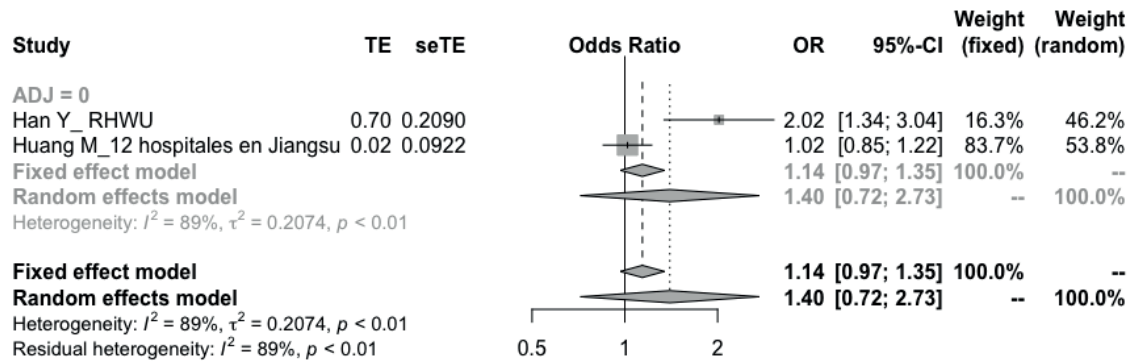

Candidate variable: High SOFA score (more than 2), outcome: severe Covid-19 disease

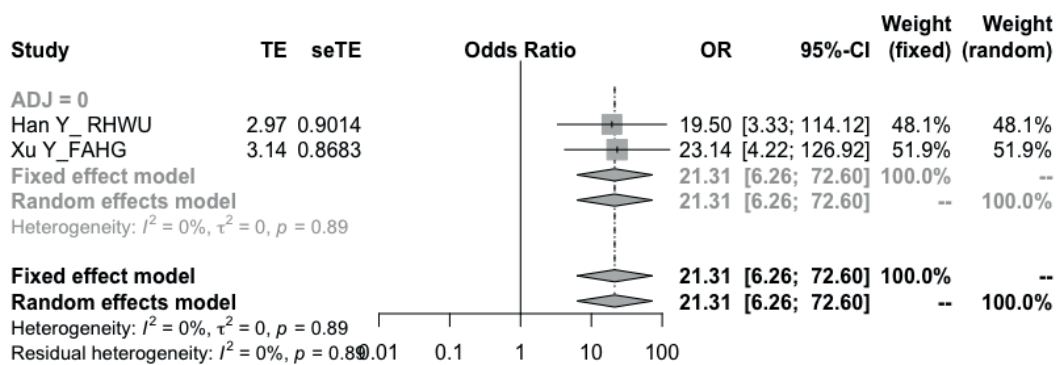

Supplement: S7 (10.1371/journal.pone.0241955.s007) [file journal.pone.0241955.s007]
