# Supplementary material for: Prognostic factors for severity and mortality in patients infected with COVID-19: A systematic review
Source: PubMed Central journal article supplement (PMC7671522; doi:10.1371/journal.pone.0241955), 2020-11-17

## Subgroup analyses Forest plots

### Glossary

Sev: Severe COVID-19 disease

ARM/IVM: invasive mechanical ventilation

ARDS: acute respiratory distress syndrome

ICU: intensive care unit

Sat <90%: oxygen saturation less than 90%

OTHER: other severity definitions

ALT: Alanine aminotransferase

APTT: activated partial thromboplastin time

APACHE: Acute Physiology And Chronic Health Evaluation II

AST: Aspartate aminotransferase

FDP: Fibrin Degradation Product

NA: Not applicable

PT: prothrombin time

Candidate variable: Smoking (Active, present smoker), outcome: severe COVID-19 disease, subgroup analysis by COVID-19 severity definition

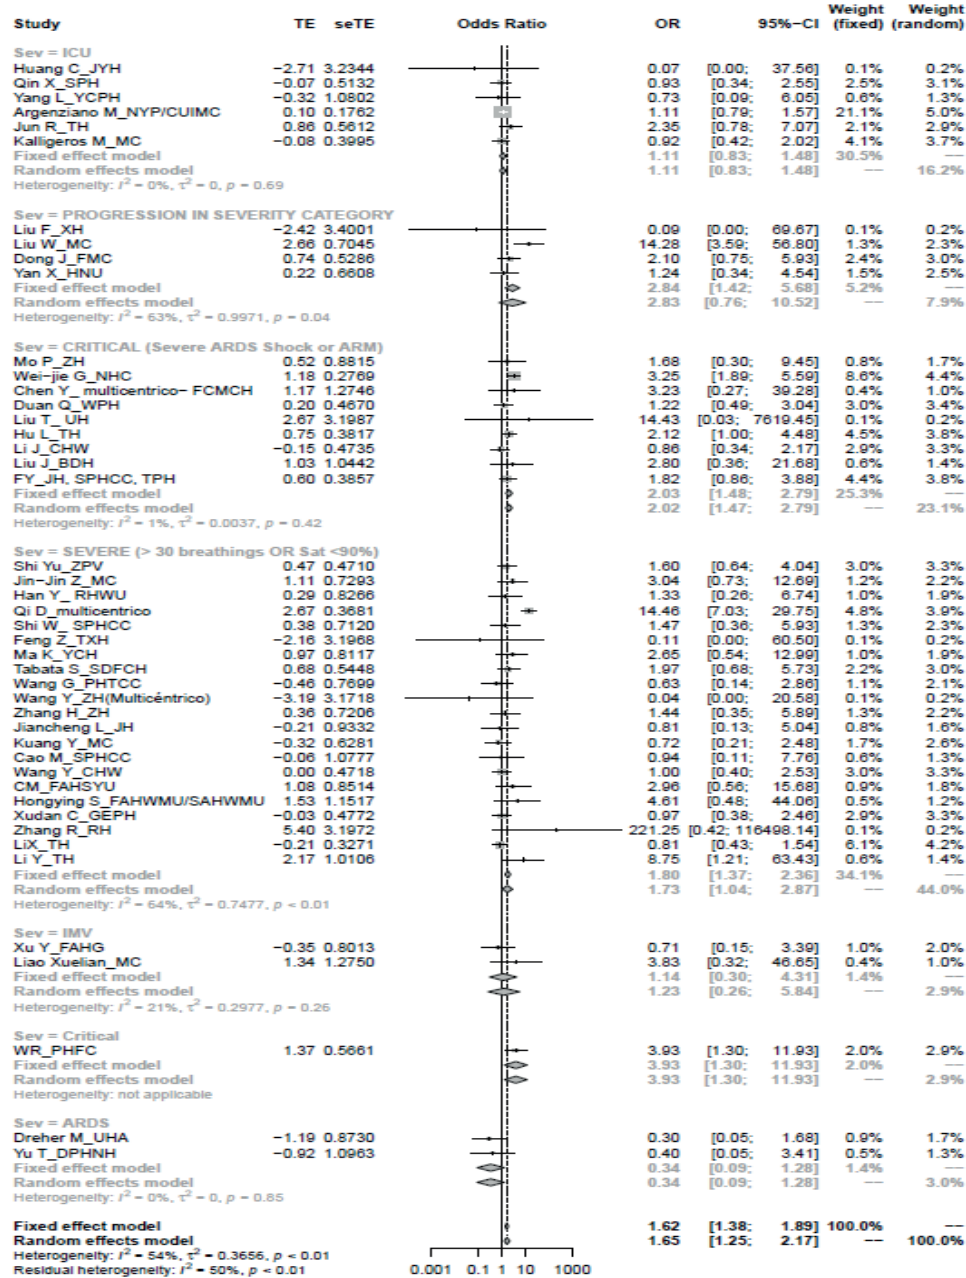

Candidate variable: Smoking (Active, present smoker), outcome: severe COVID-19 disease, subgroup analysis by COVID-19 severity definition

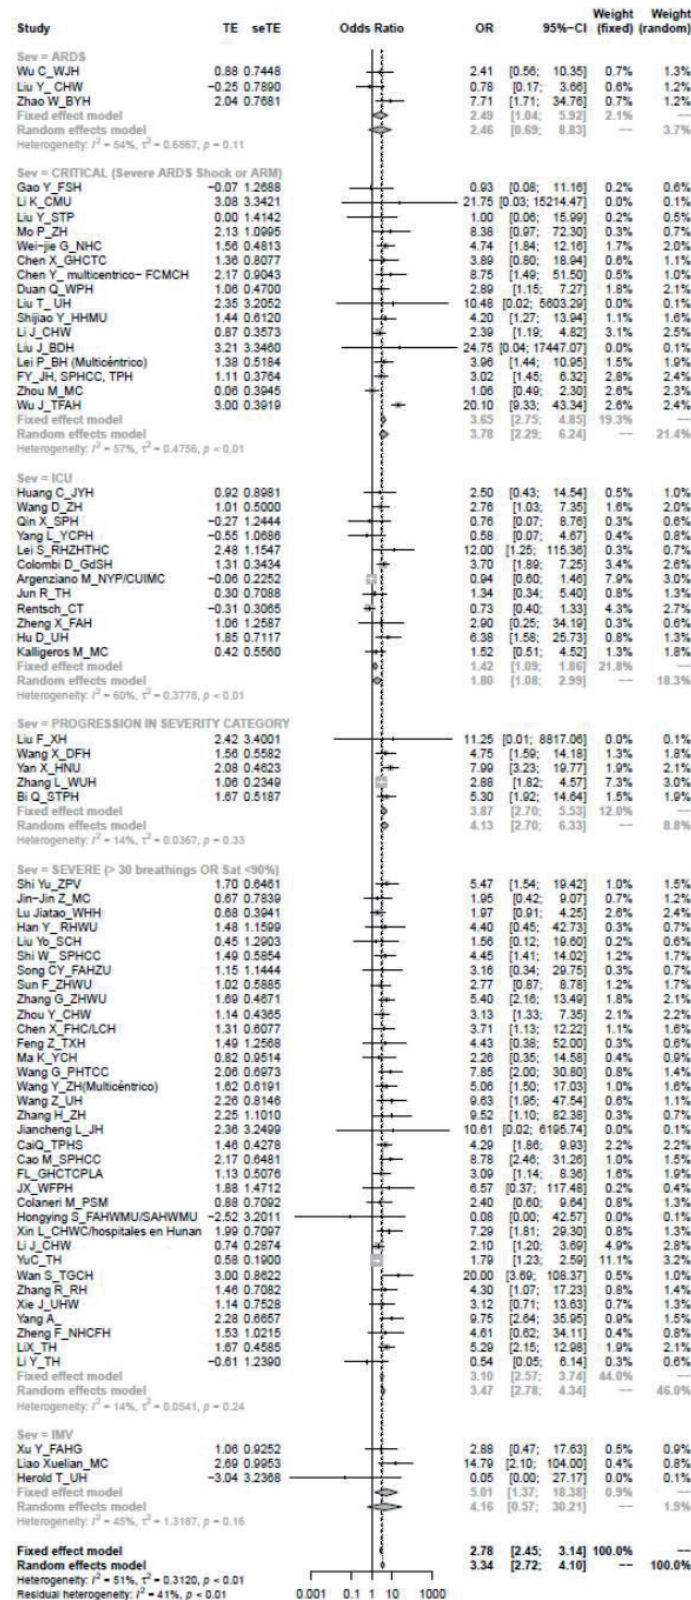

Candidate variable: Cerebrovascular disease (History of stroke or CNS disease), outcome: severe COVID-19 disease, subgroup analysis by COVID-19 severity definition

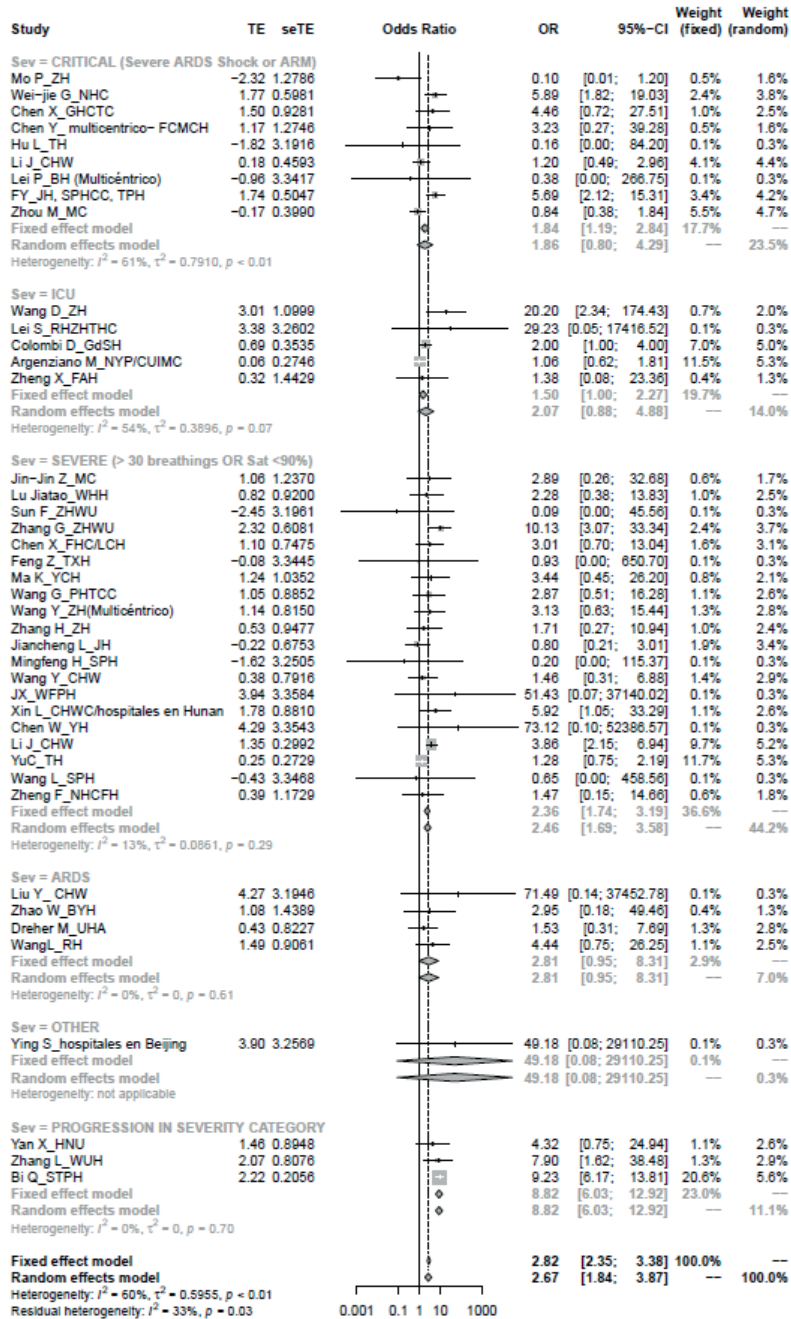

Candidate variable: Arterial hypertension, outcome: severe COVID-19 disease, subgroup analysis by COVID-19 severity definition

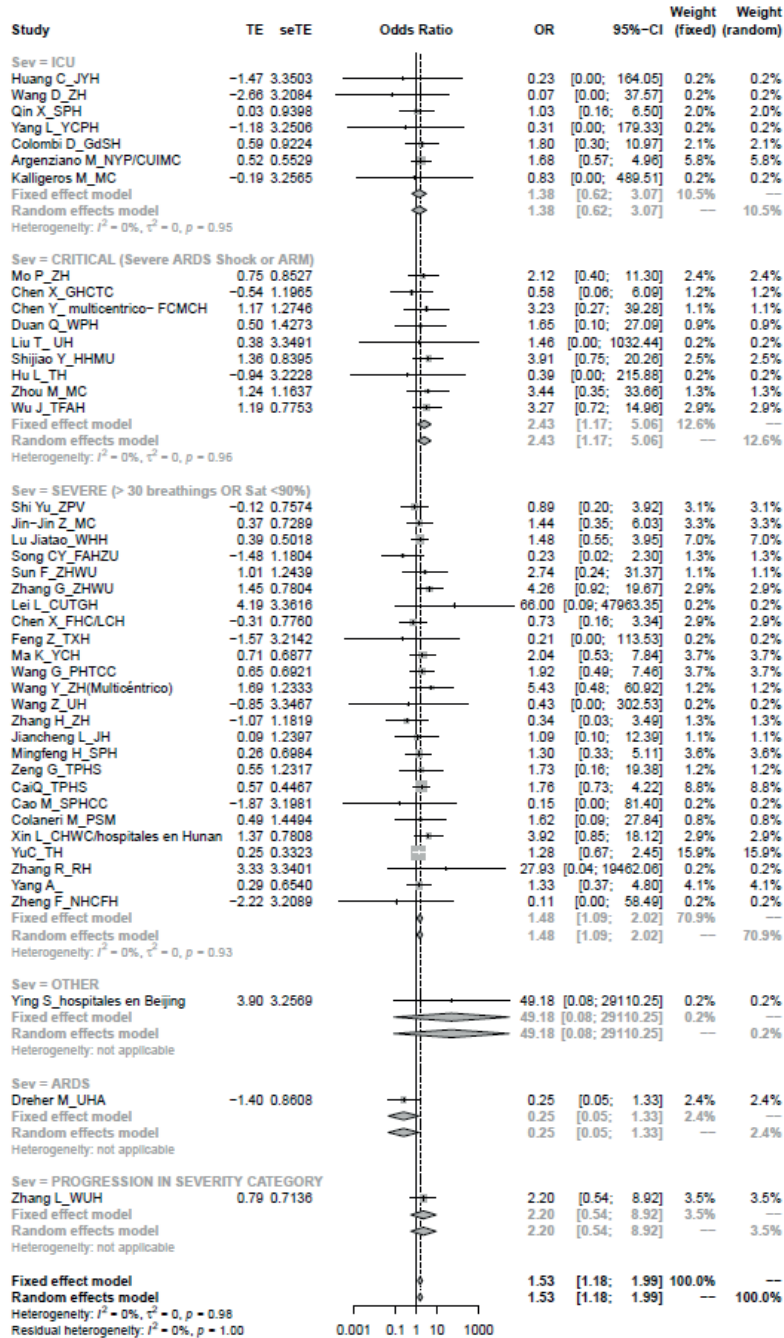

Candidate variable: Chronic kidney disease, outcome: severe COVID-19 disease, subgroup analysis by COVID-19 severity definition

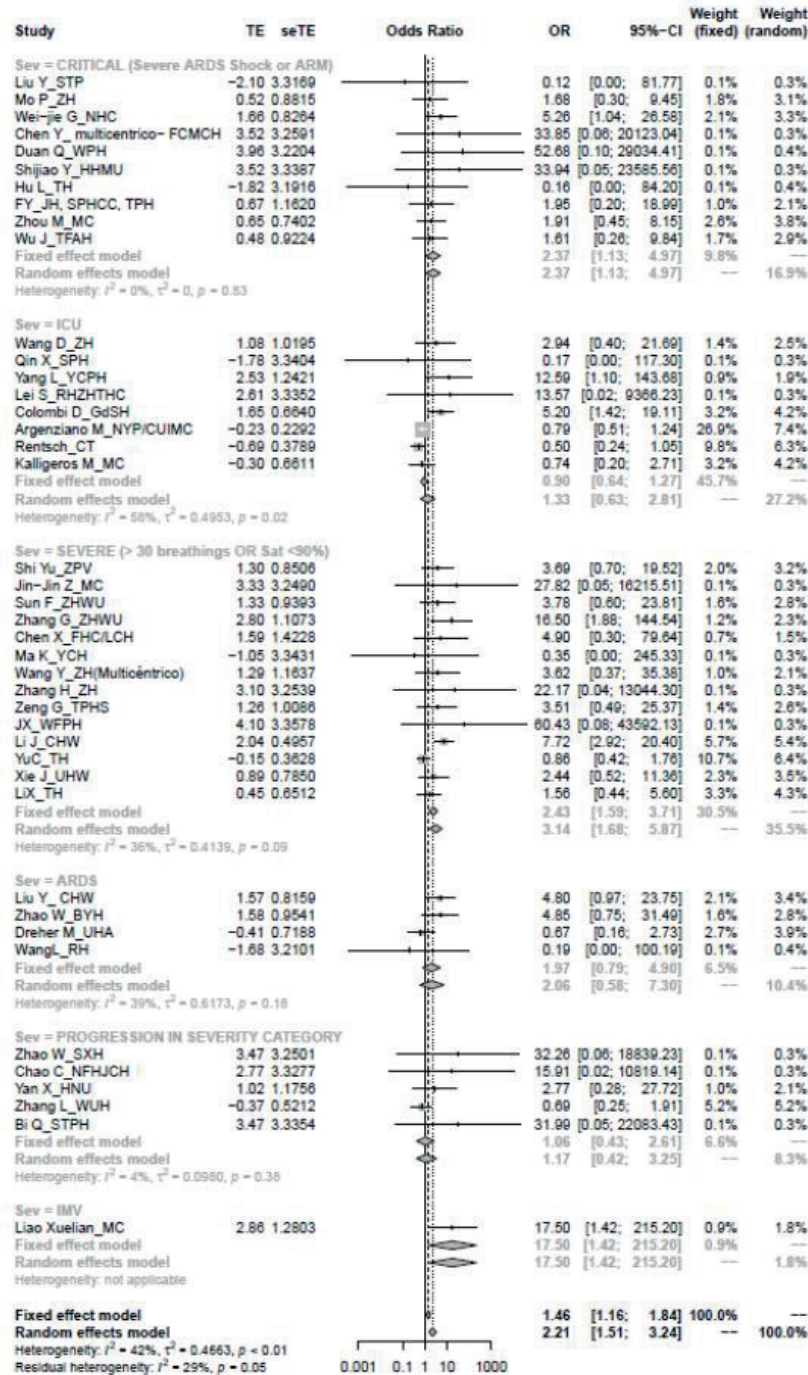

Candidate variable: Cancer (solid or active haematologic cancer),  
 outcome: severe COVID-19 disease, subgroup analysis by COVID-19  
 severity definition

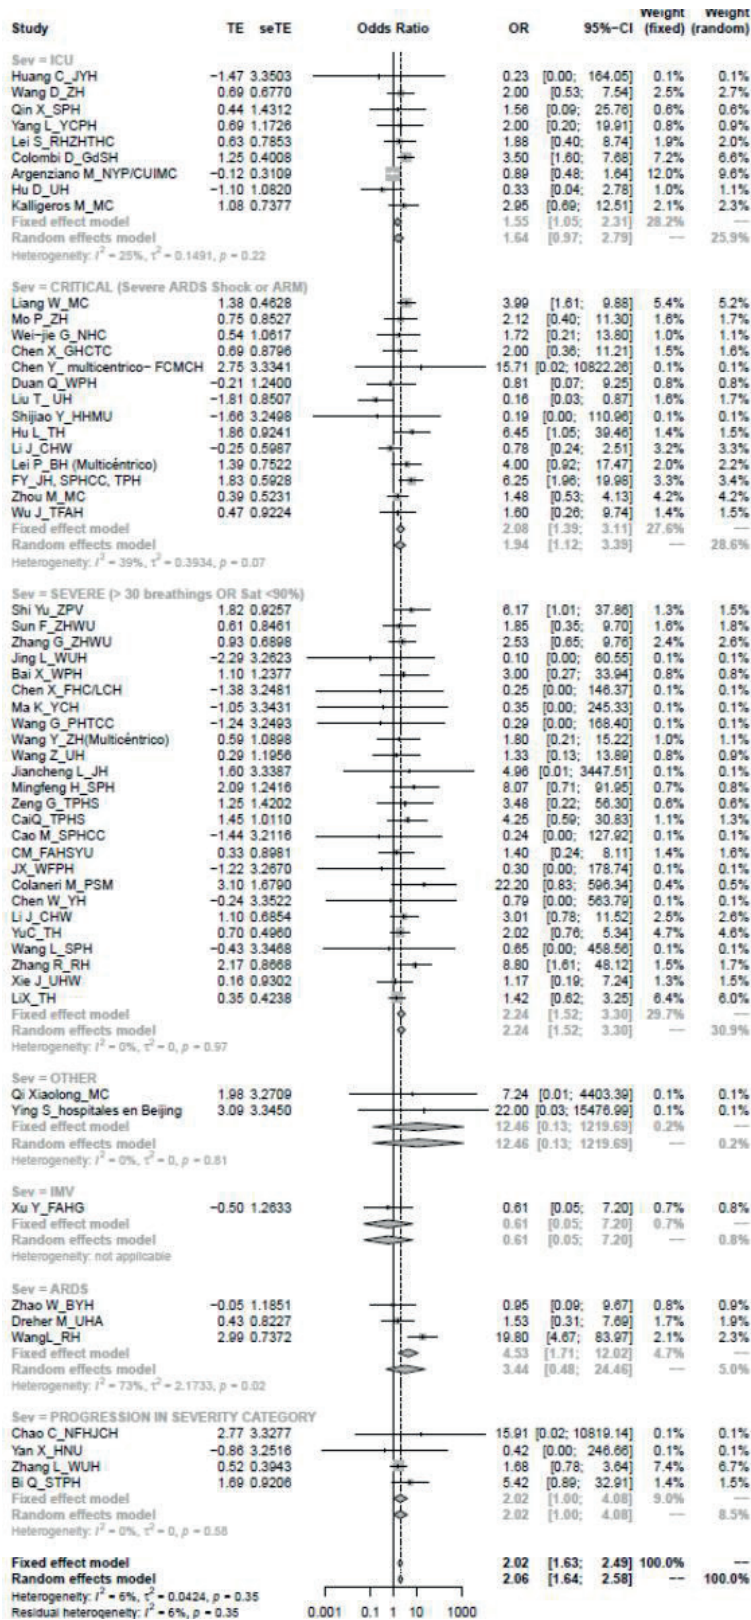

Candidate variable: Chronic liver disease, outcome: severe COVID-19 disease, subgroup analysis by COVID-19 severity definition

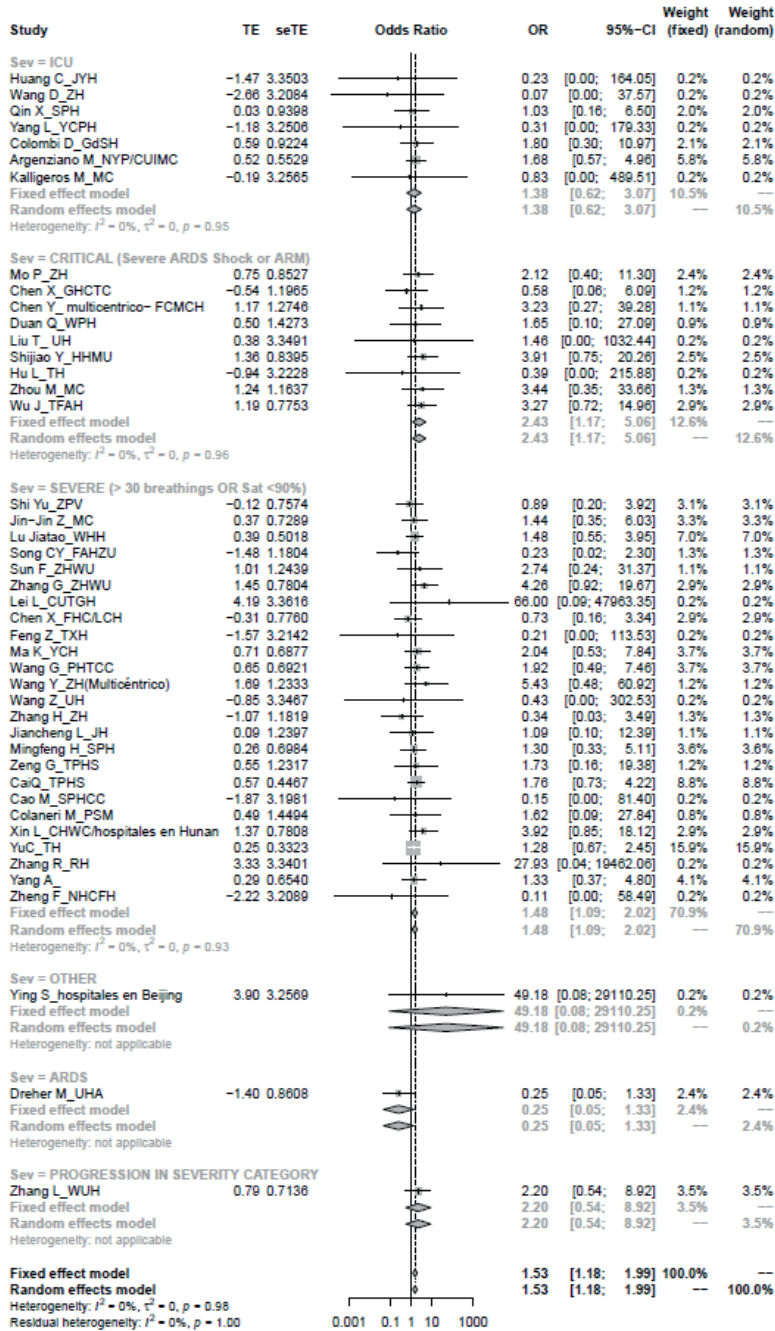



Candidate variable: Chronic gastric disease: History of peptic ulcer or gastritis, outcome: severe COVID-19 disease, subgroup analysis by COVID-19 severity definition

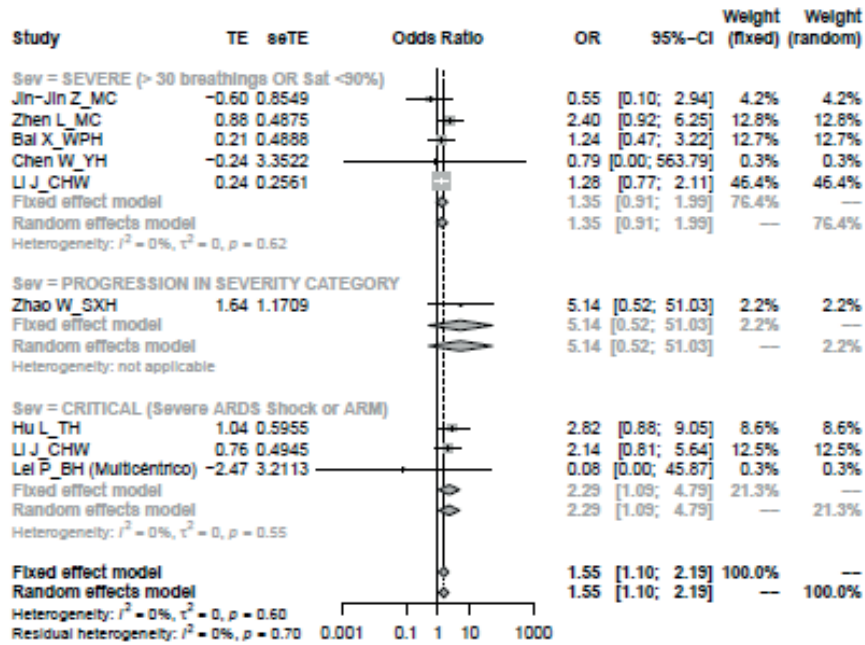

Candidate variable: Tachypnea, outcome: severe COVID-19 disease, subgroup analysis by COVID-19 severity definition

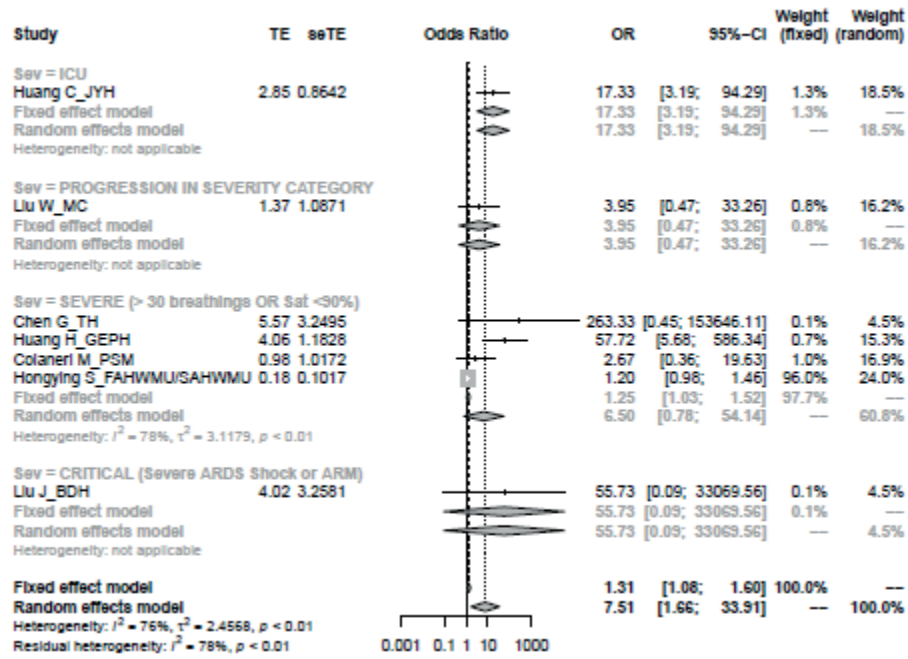

Candidate variable: Hypoxemia, outcome: severe COVID-19 disease, subgroup analysis by COVID-19 severity definition

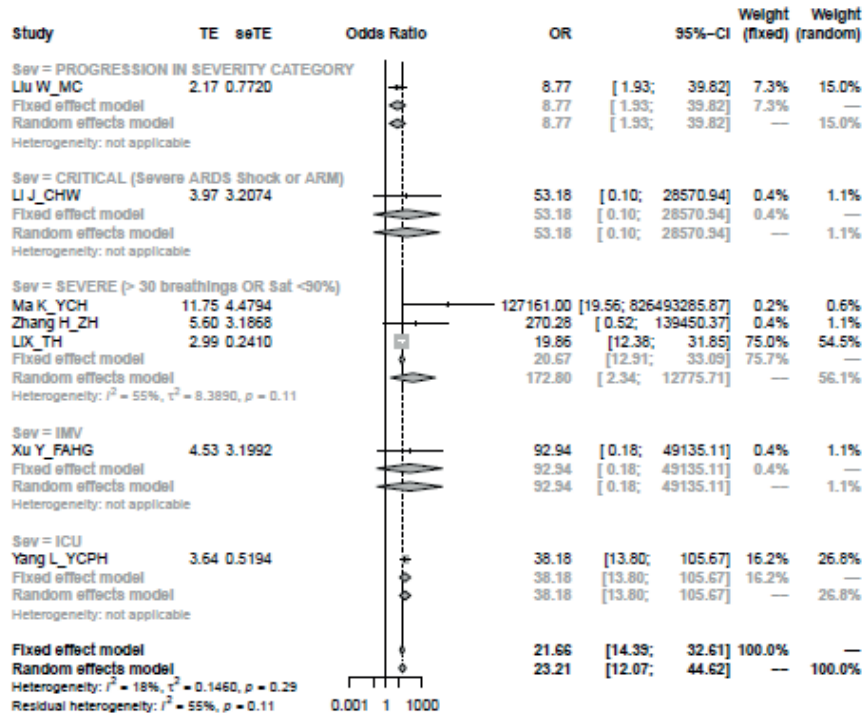

Candidate variable: Dyspnea, outcome: severe COVID-19 disease, subgroup analysis by COVID-19 severity definition

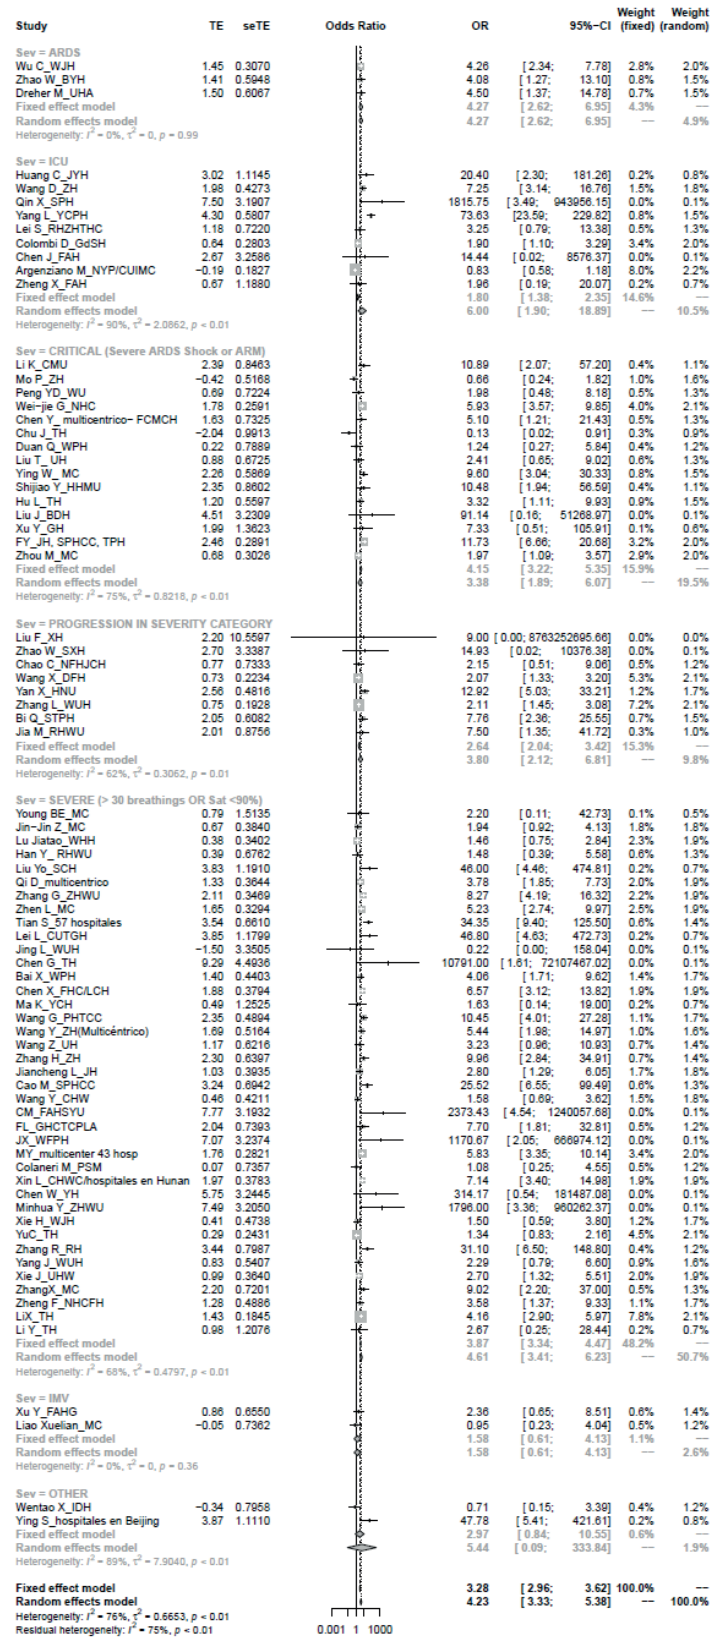

Candidate variable: Chest pain, outcome: severe COVID-19 disease, subgro analysis by COVID-19 severity definition

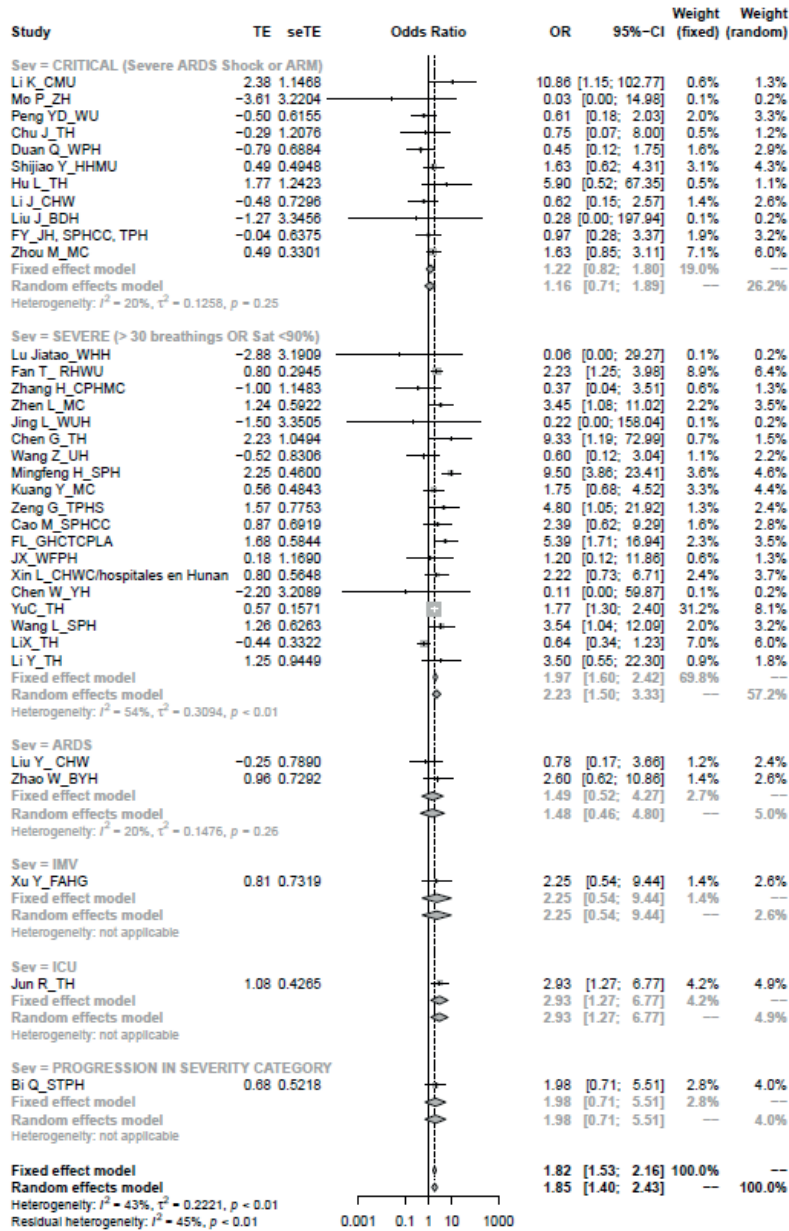

Candidate variable: High fever (more than 39°C), outcome: severe COVID-19 disease, subgroup analysis by COVID-19 severity definition

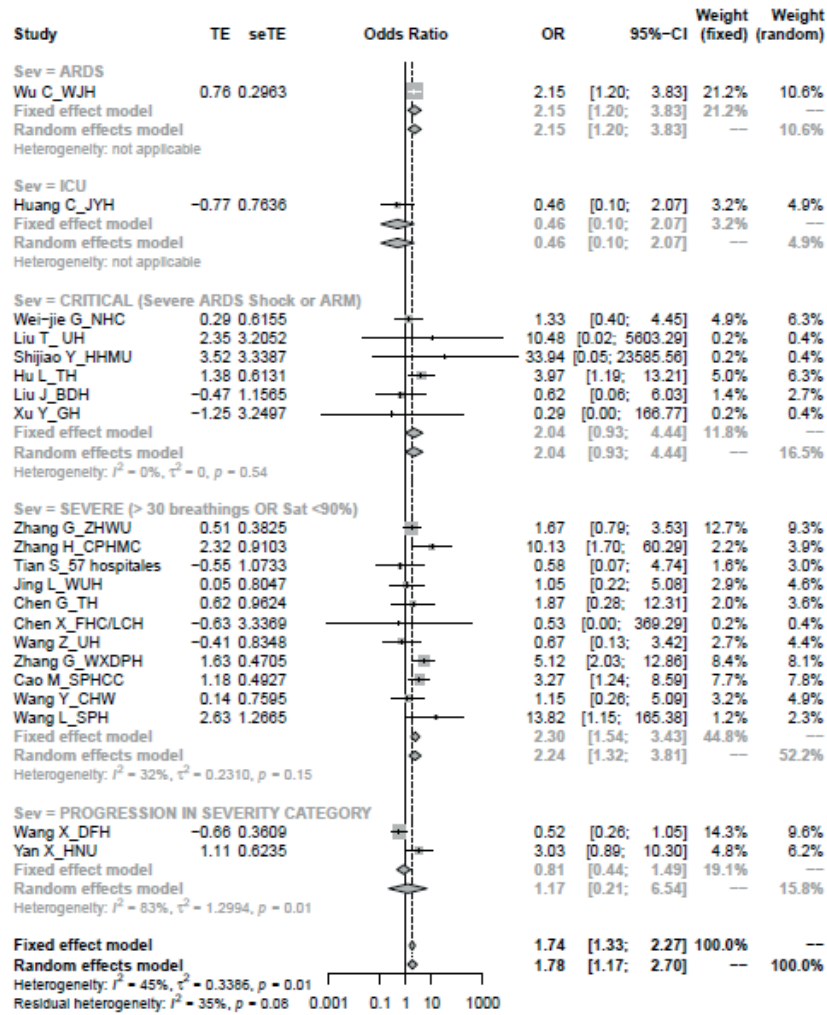

# Candidate variable: Fever, outcome: severe COVID-19 disease, subgroup analysis by COVID-19 severity definition

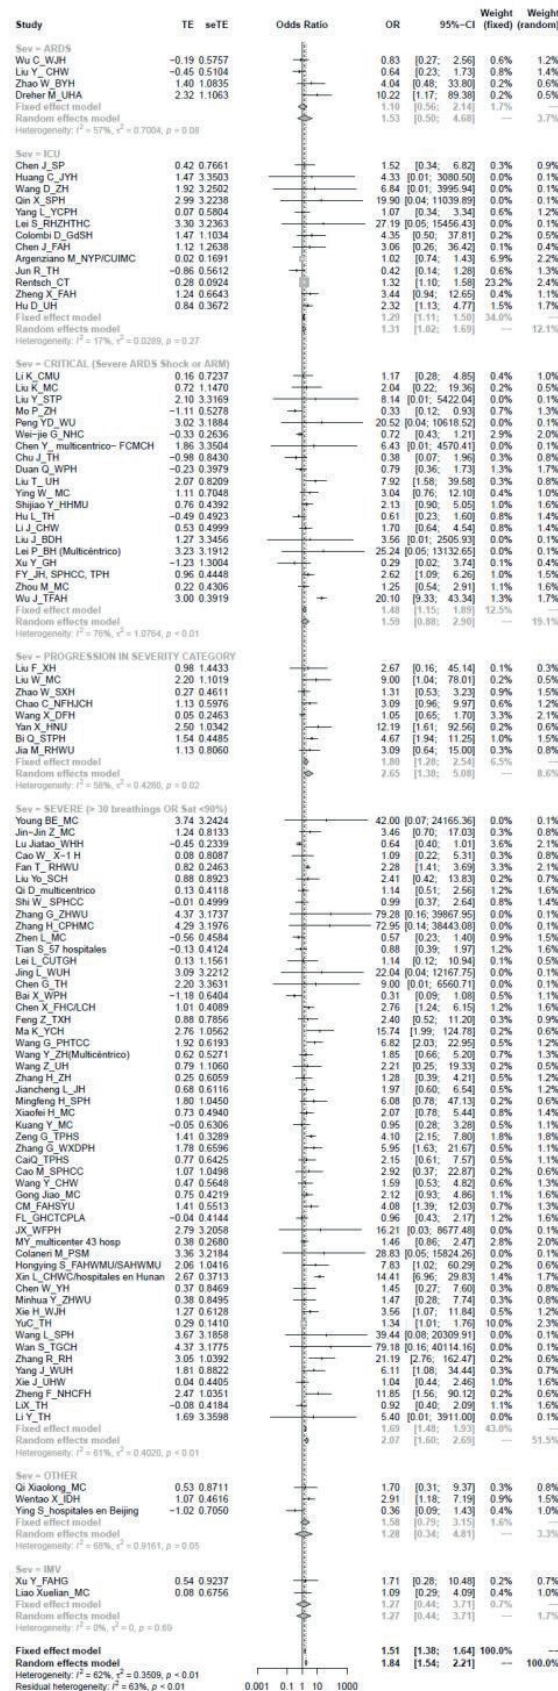

Candidate variable: Rhinorrhea, outcome: severe COVID-19 disease, subgroup analysis by COVID-19 severity definition

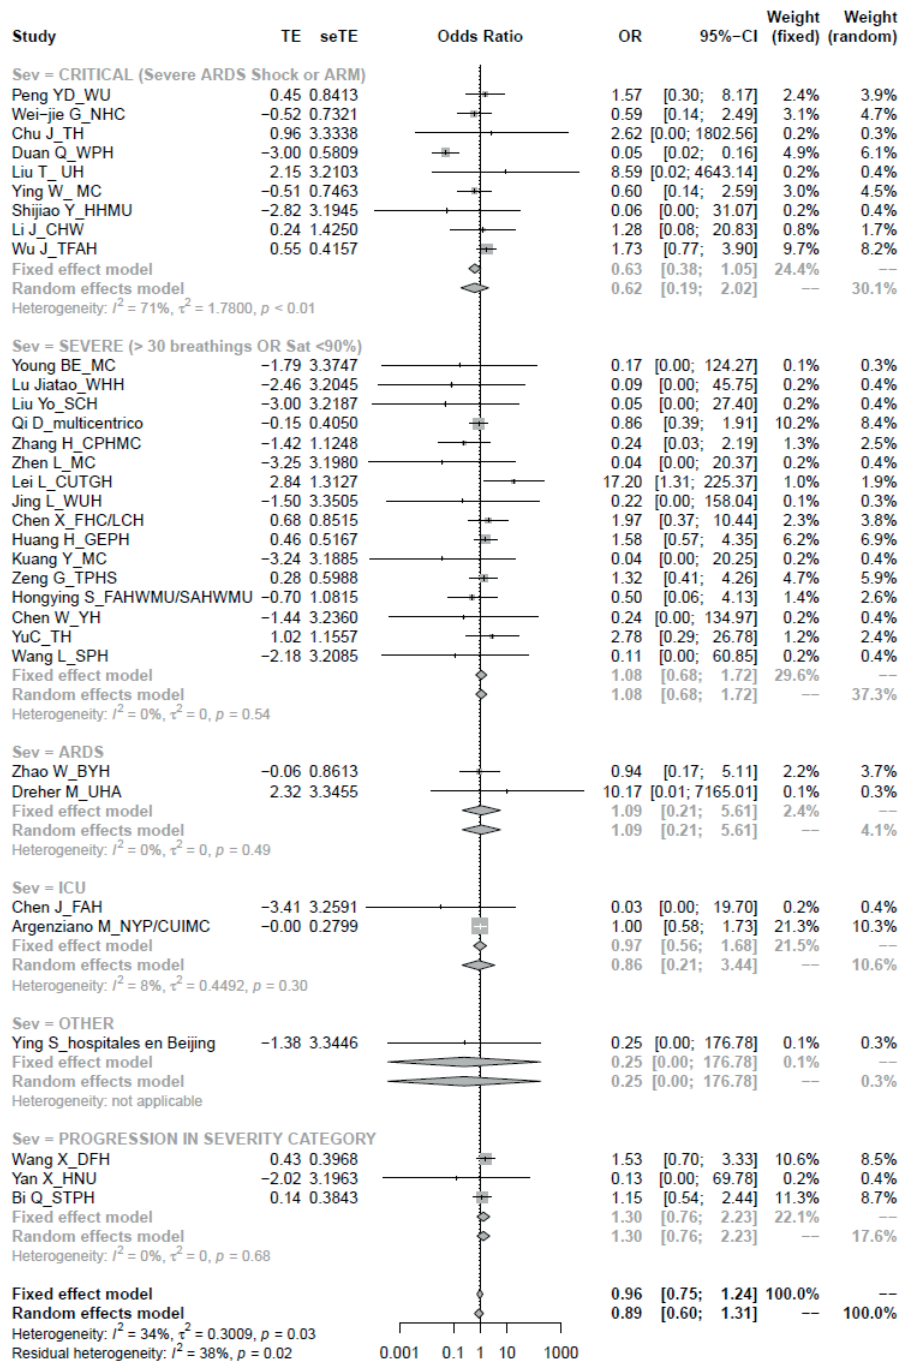



Candidate variable: Cough, outcome: severe COVID-19 disease, subgroup analysis by COVID-19 severity definition

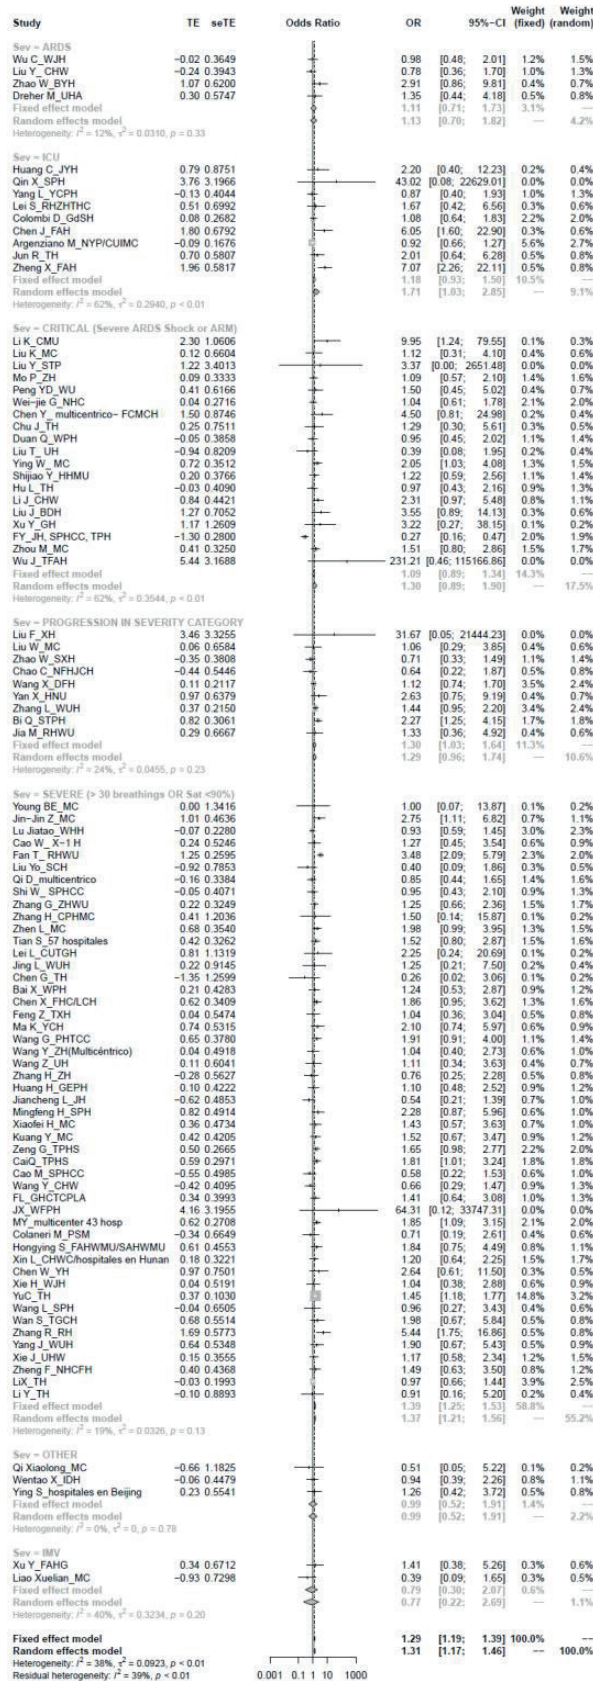

Candidate variable: Fatigue, outcome: severe COVID-19 disease, subgroup analysis by COVID-19 severity definition

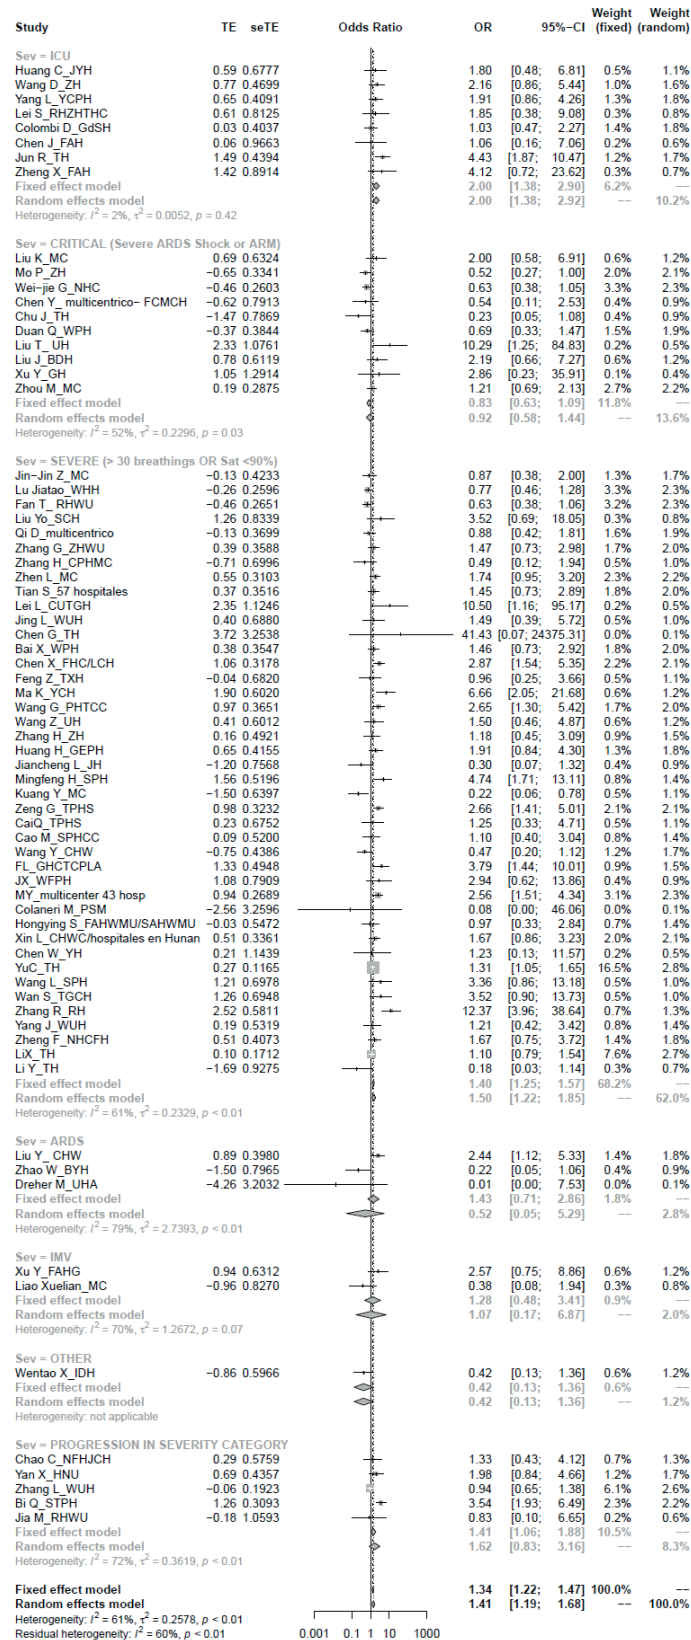

Candidate variable: Diarrhea, outcome: severe COVID-19 disease, subgroup analysis by COVID-19 severity definition

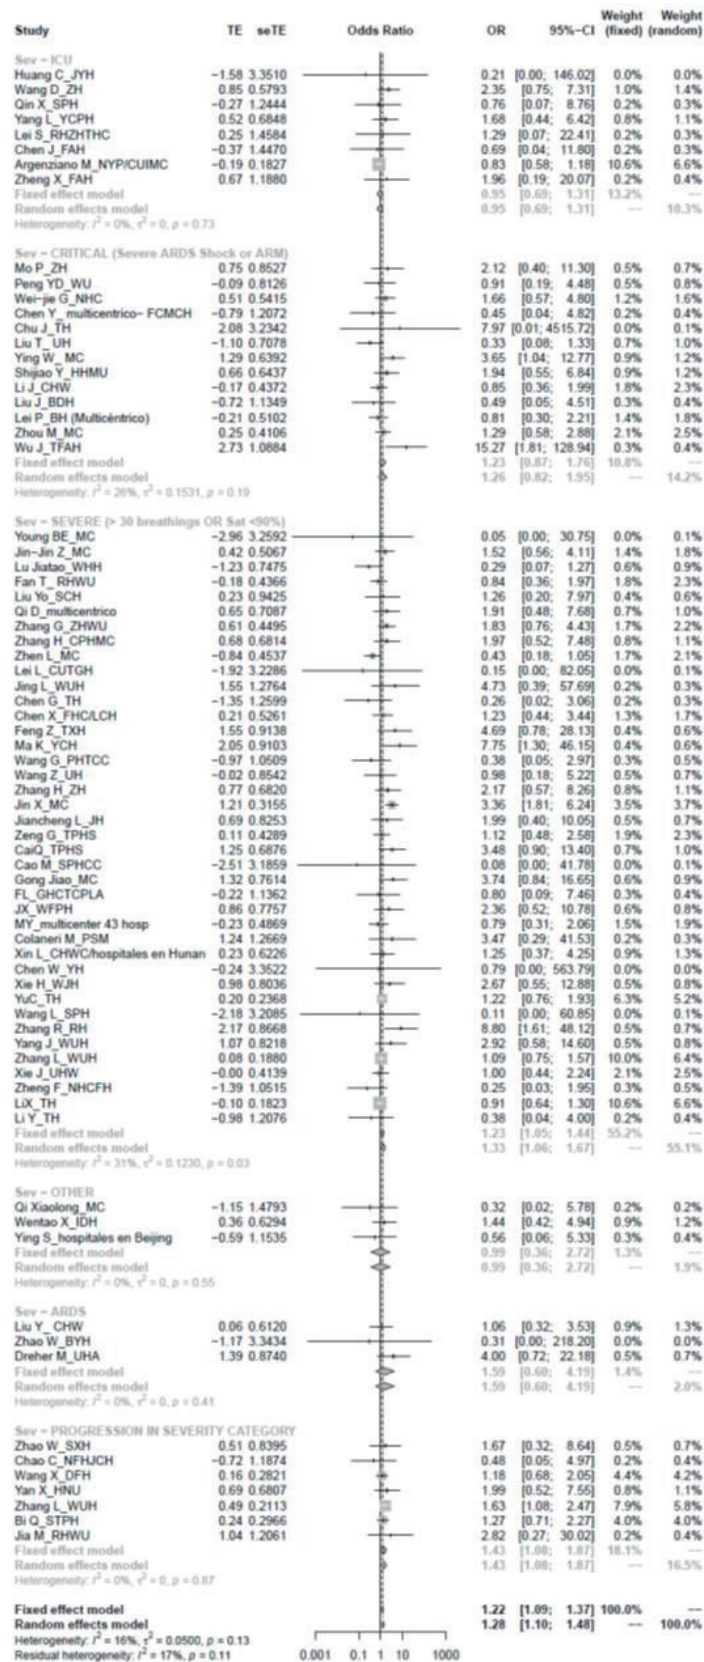

Candidate variable: Anemia, outcome: severe COVID-19 disease,  
subgroup analysis by COVID-19 severity definition

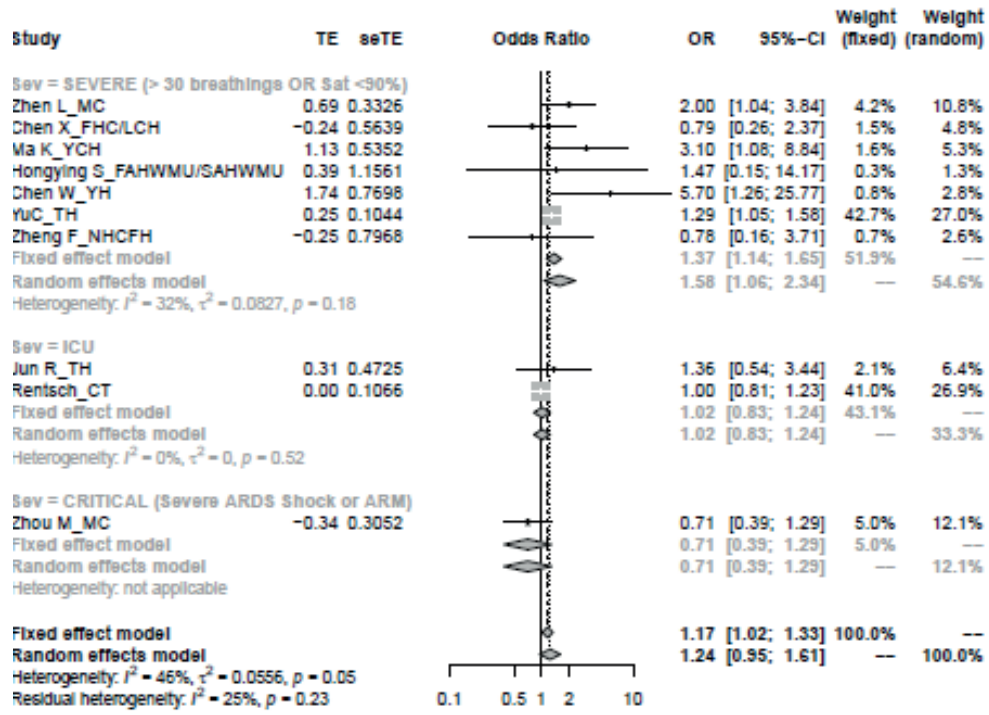

Candidate variable: Neutrophil count increase (per  $1 \times 10^9$  U/L), outcome: severe COVID-19 disease, subgroup analysis by COVID-19 severity definition

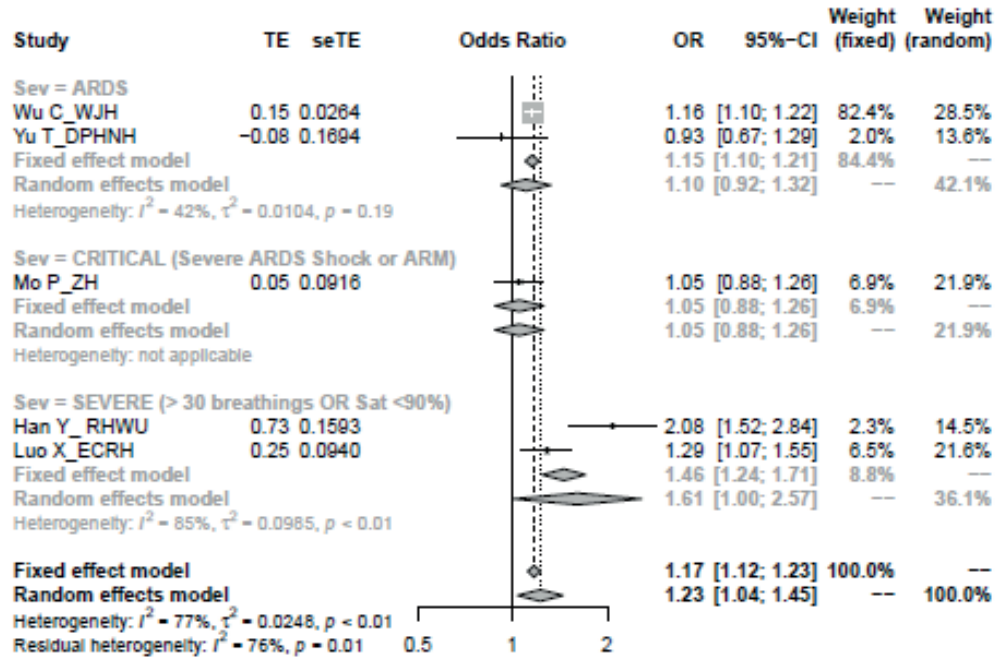

Candidate variable: Low neutrophil count (Less than  $1.8 \times 10^9/L$ ),  
 outcome: severe COVID-19 disease, subgroup analysis by COVID-19  
 severity definition

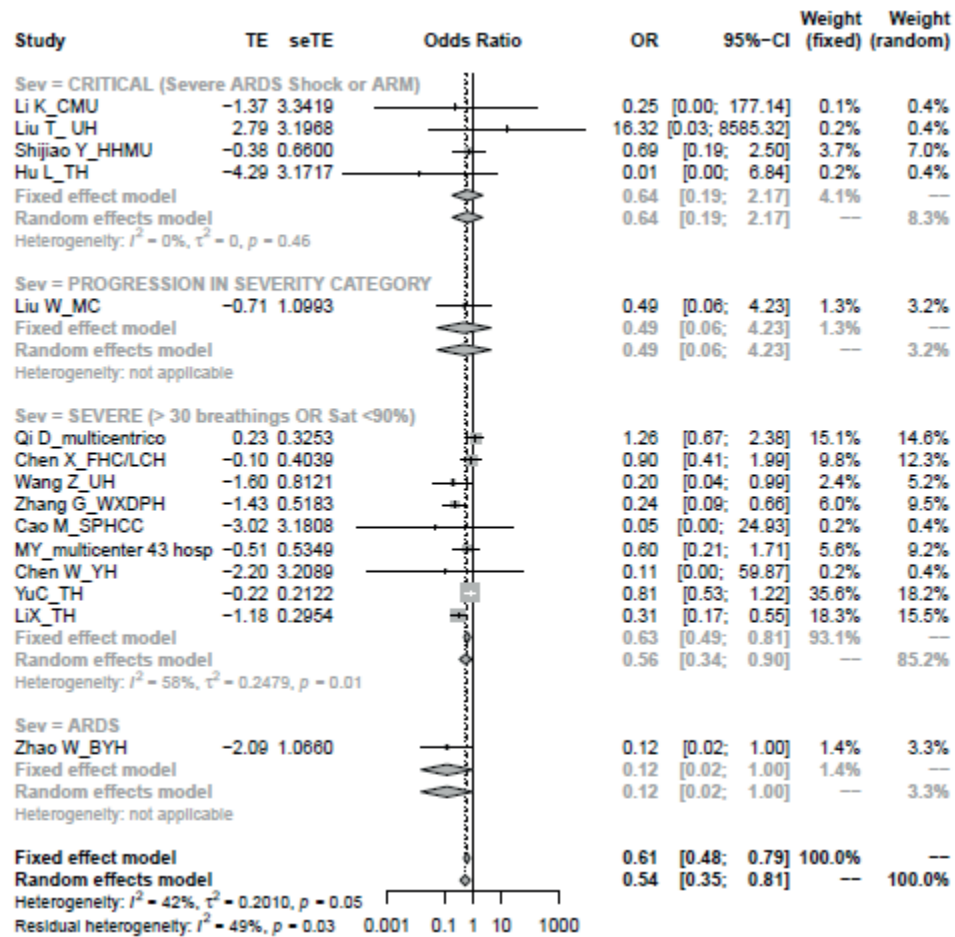

Candidate variable: Leukopenia (Less than  $3.5-4 \times 10^9/L$ ), outcome: severe COVID-19 disease, subgroup analysis by COVID-19 severity definition

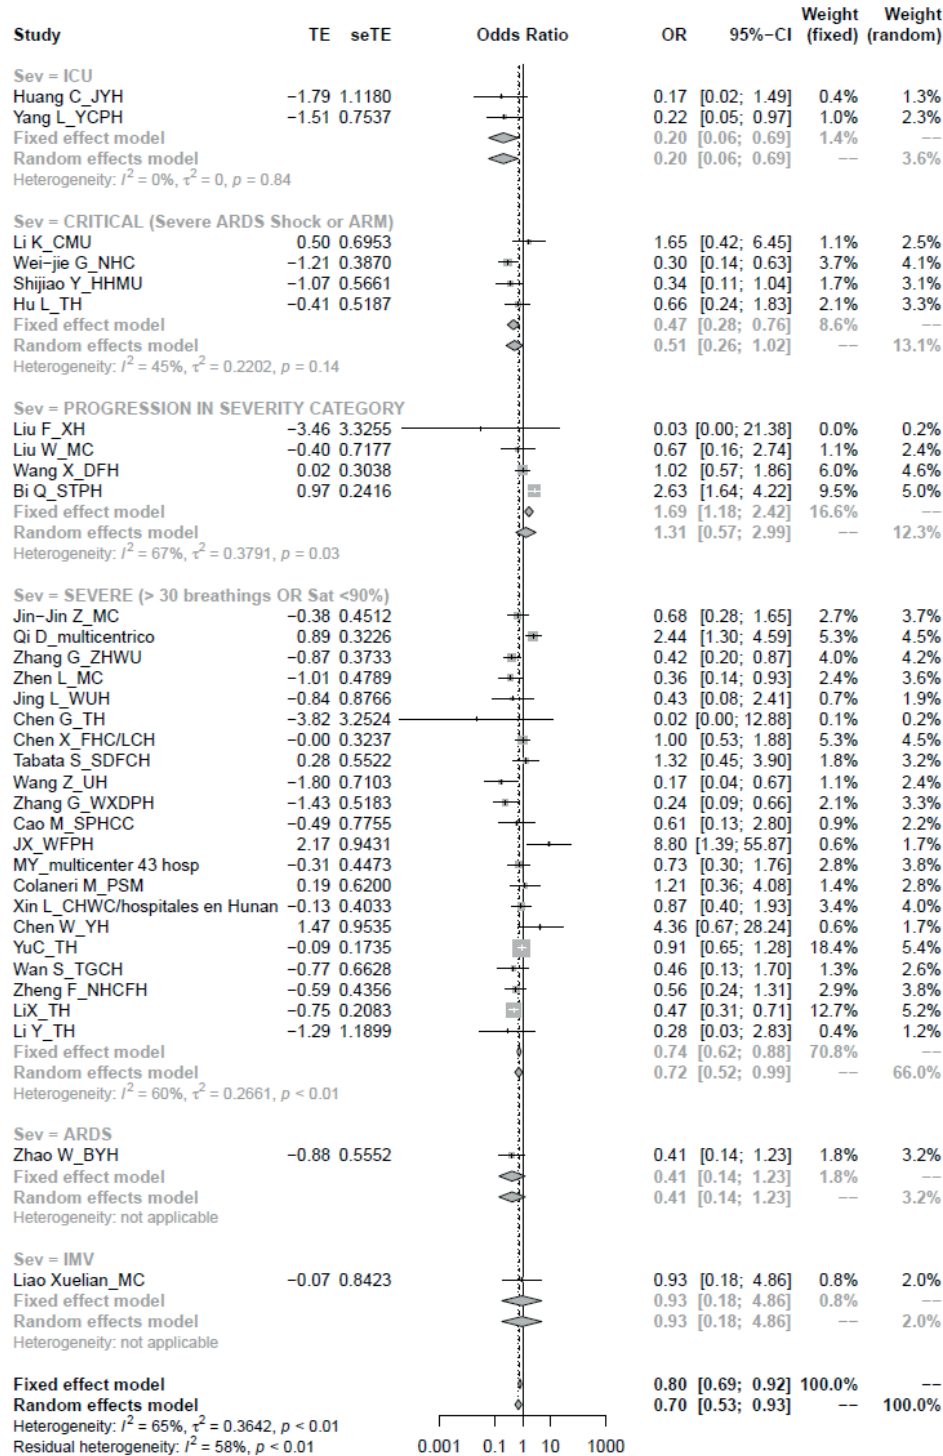

Candidate variable: Low lymphocyte count (less than 0.8-1.5x 10<sup>9</sup>/L),  
 outcome: severe COVID-19 disease, subgroup analysis by COVID-19  
 severity definition

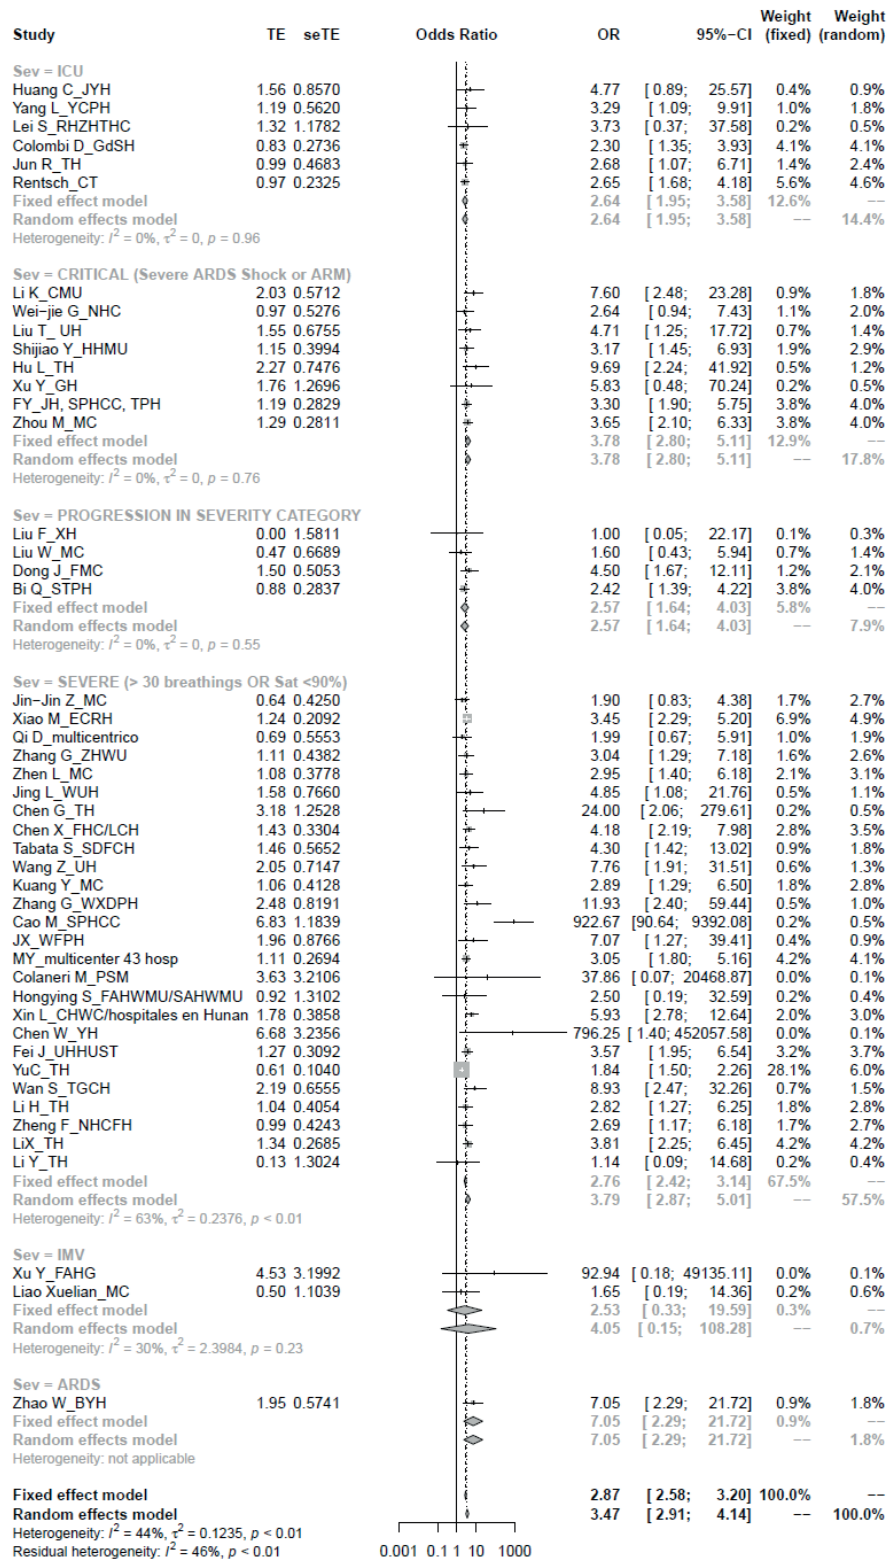



Candidate variable: Low platelet count (less than 100-150 x 10<sup>9</sup>/L),  
 outcome: severe COVID-19 disease, subgroup analysis by COVID-19  
 severity definition

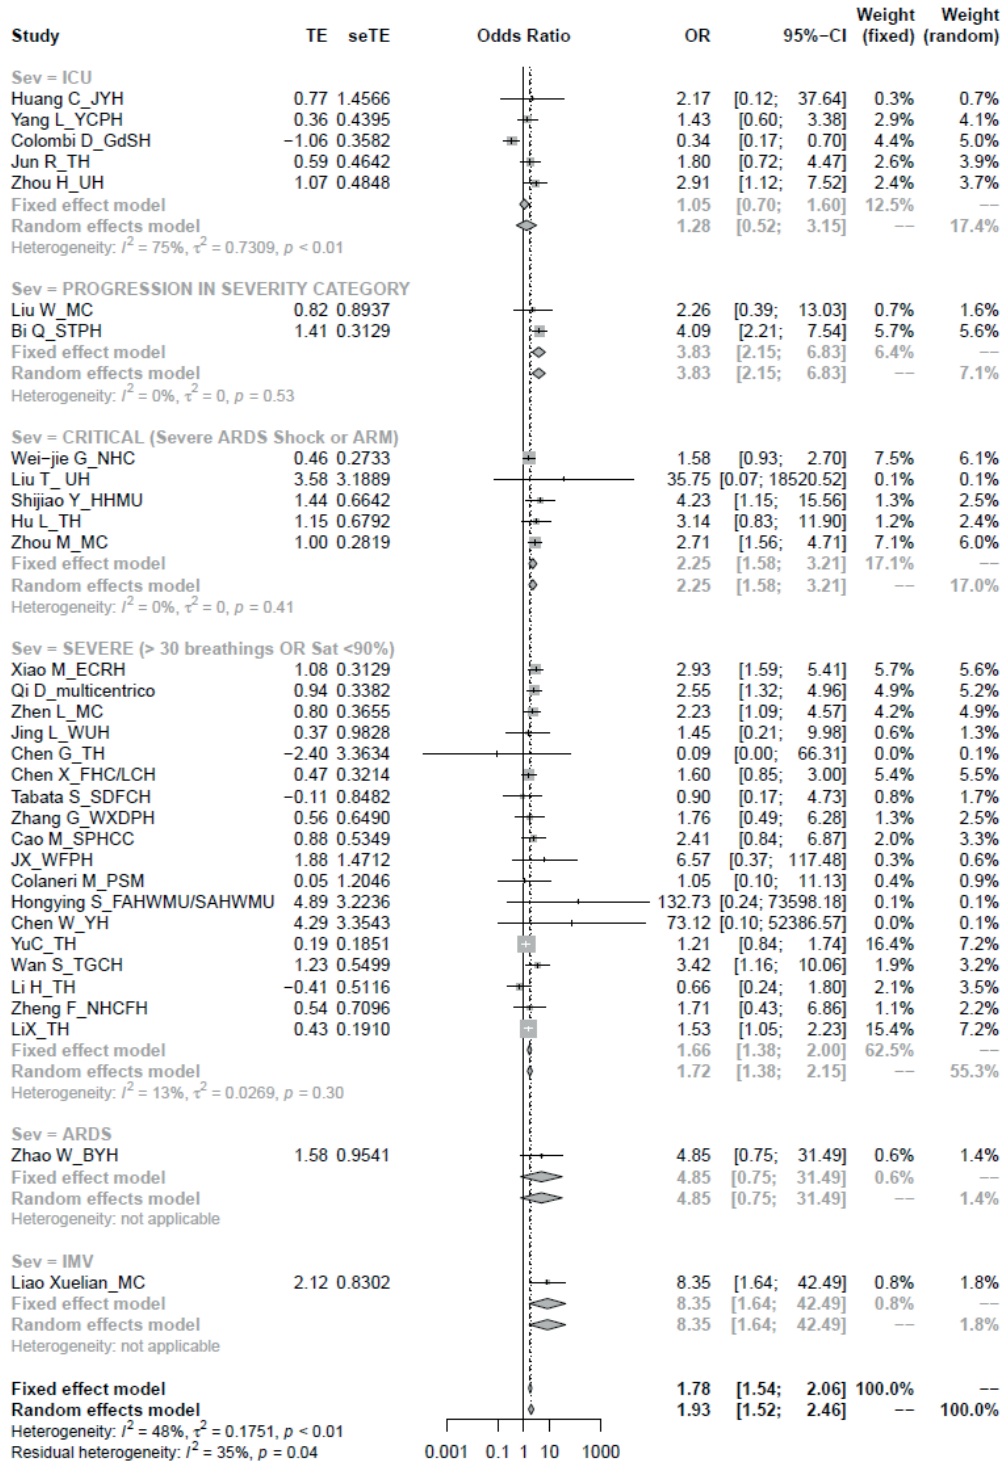

Candidate variable: High plasma creatinine (more than 1.5 mg<sup>0</sup>),  
 outcome: severe COVID-19 disease, subgroup analysis by COVID-19  
 severity definition

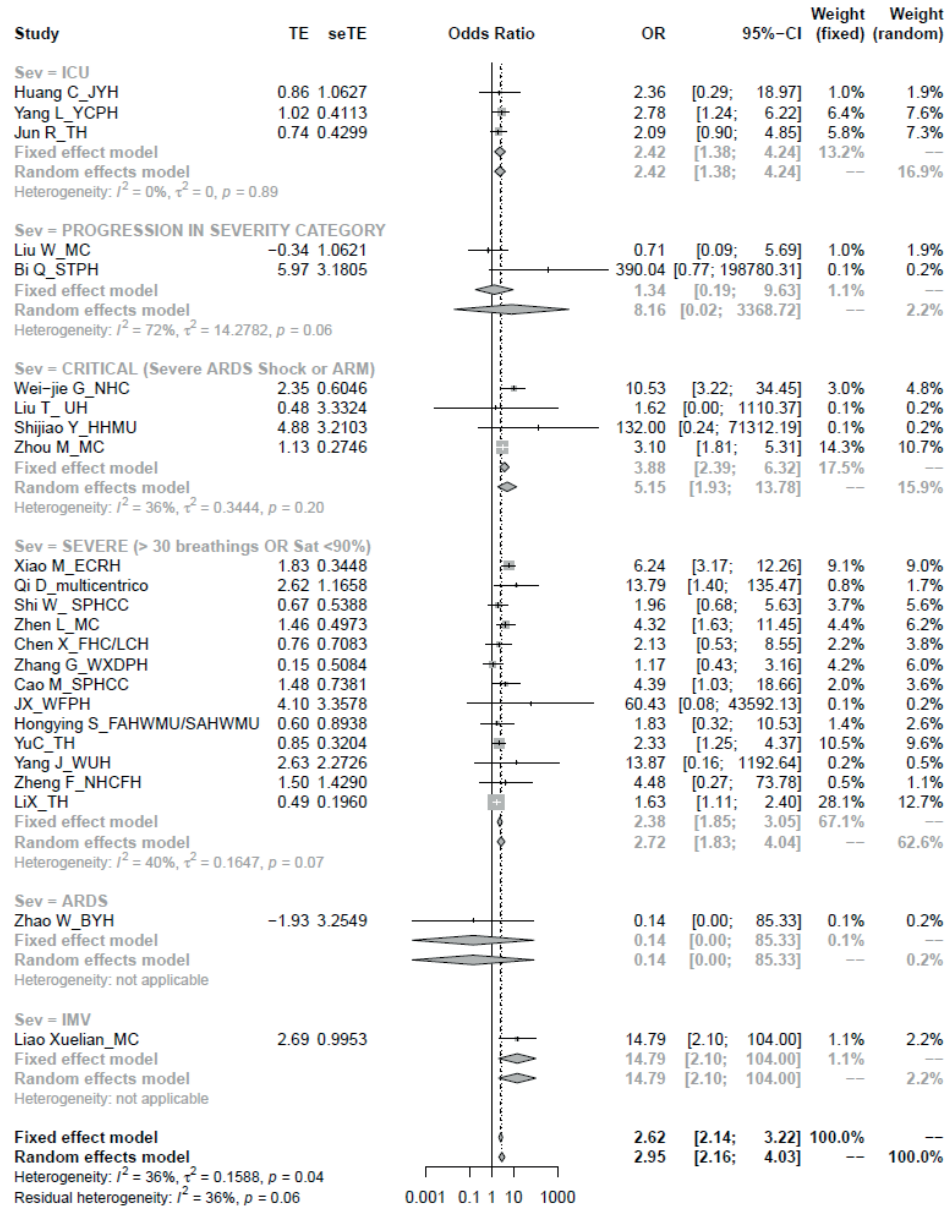

Candidate variable: High LDH (more than 240-250 U/L), outcome: severe COVID-19 disease, subgroup analysis by COVID-19 severity definition

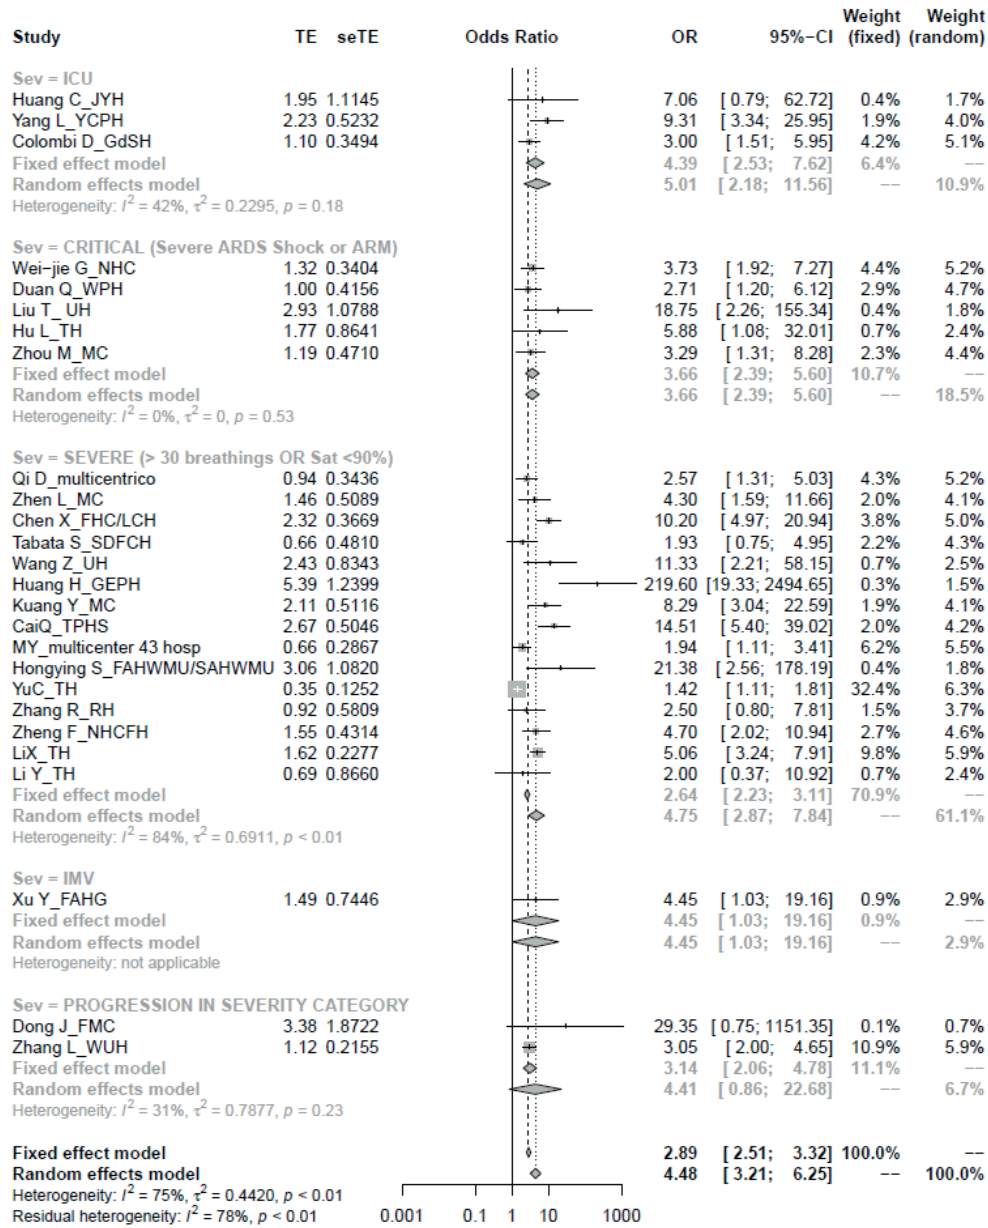

Candidate variable: LDH increase (per 1 U/L), outcome: severe COVID-19 disease, subgroup analysis by COVID-19 severity definition

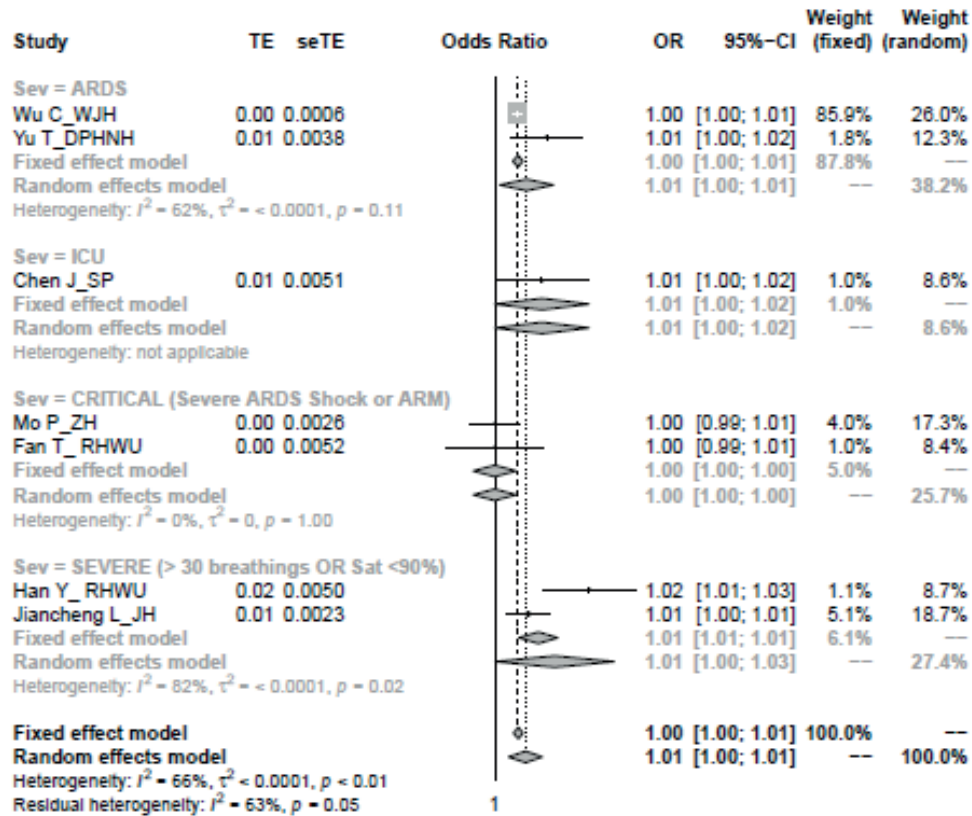

Candidate variable: CK-MB increase (per 1 U/L), outcome: severe COVID-19 disease, subgroup analysis by COVID-19 severity definition

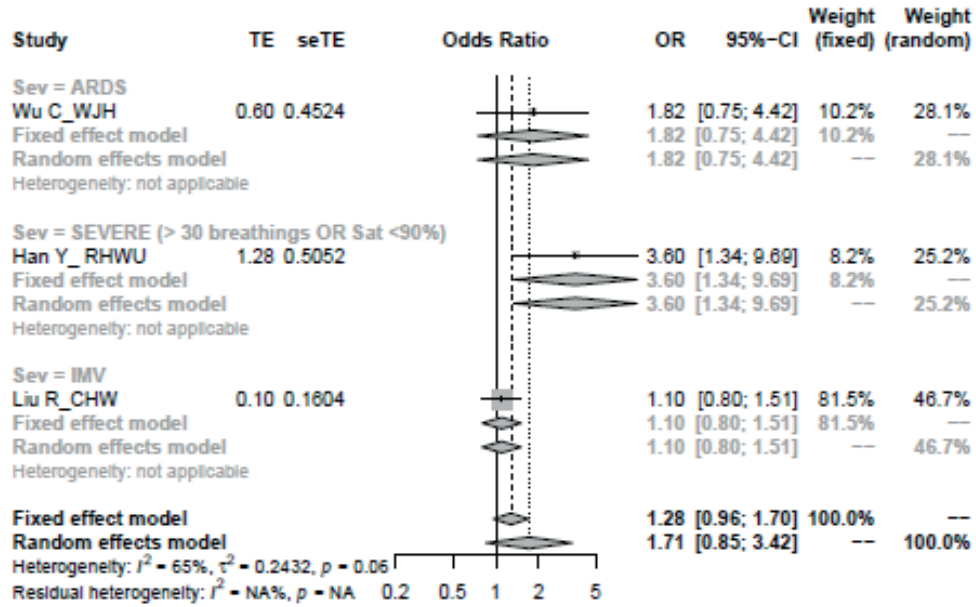

Candidate variable: High D-dimer (more than 500-1000 ng/ml), outcome: severe COVID-19 disease, subgroup analysis by COVID-19 severity definition

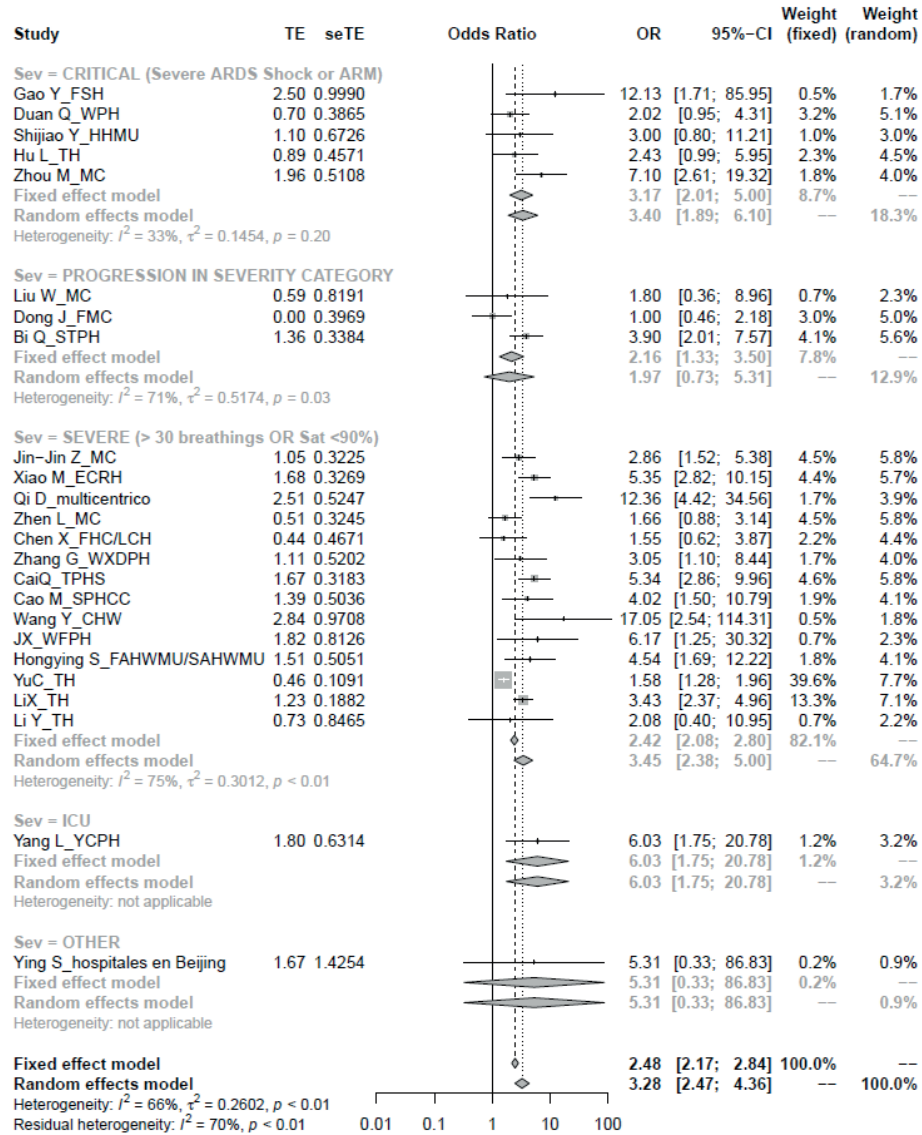

Candidate variable: Prolonged PT (more than 13.2-15 seconds), outcome: severe COVID-19 disease, subgroup analysis by COVID-19 severity definition

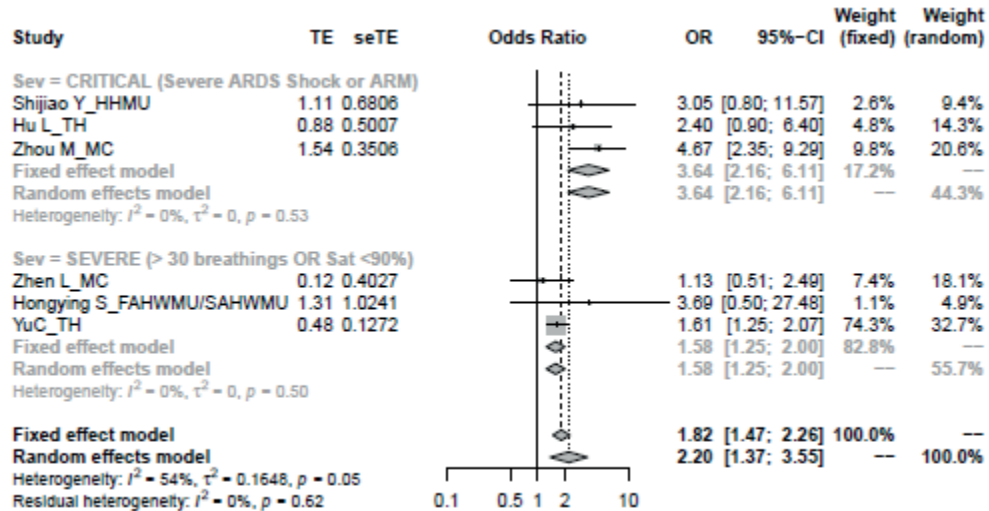

Candidate variable: Prolonged APTT (more than 35-45 seconds), outcome: severe COVID-19 disease, subgroup analysis by COVID-19 severity definition

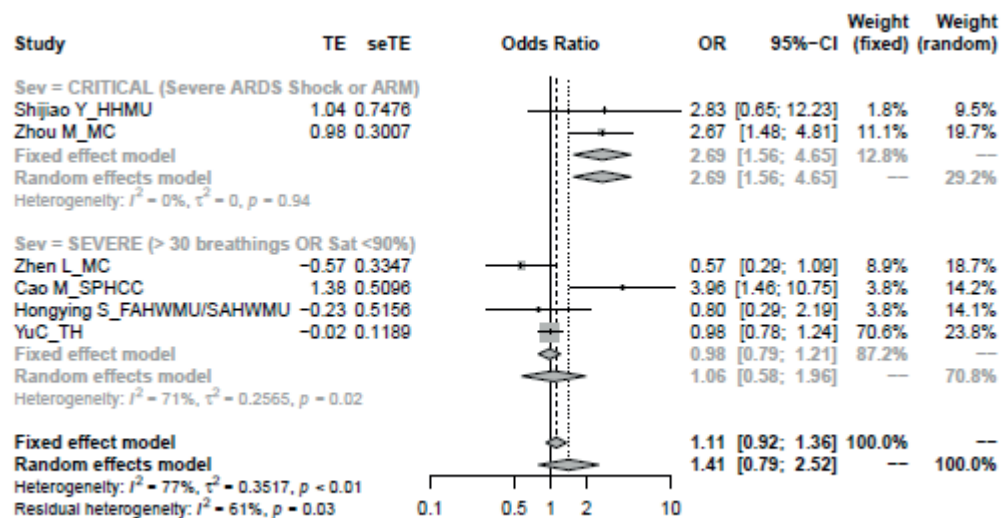

Candidate variable: APTT time increase (per 1 second), outcome: severe COVID-19 disease

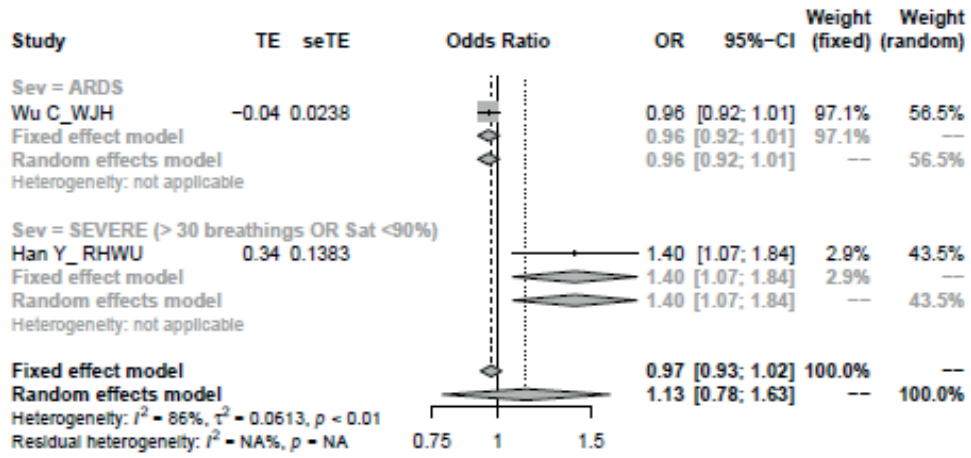



Candidate variable: High procalcitonin (More than 0.01-05 ng/ml),  
 outcome: severe COVID-19 disease, subgroup analysis by COVID-19  
 severity definition

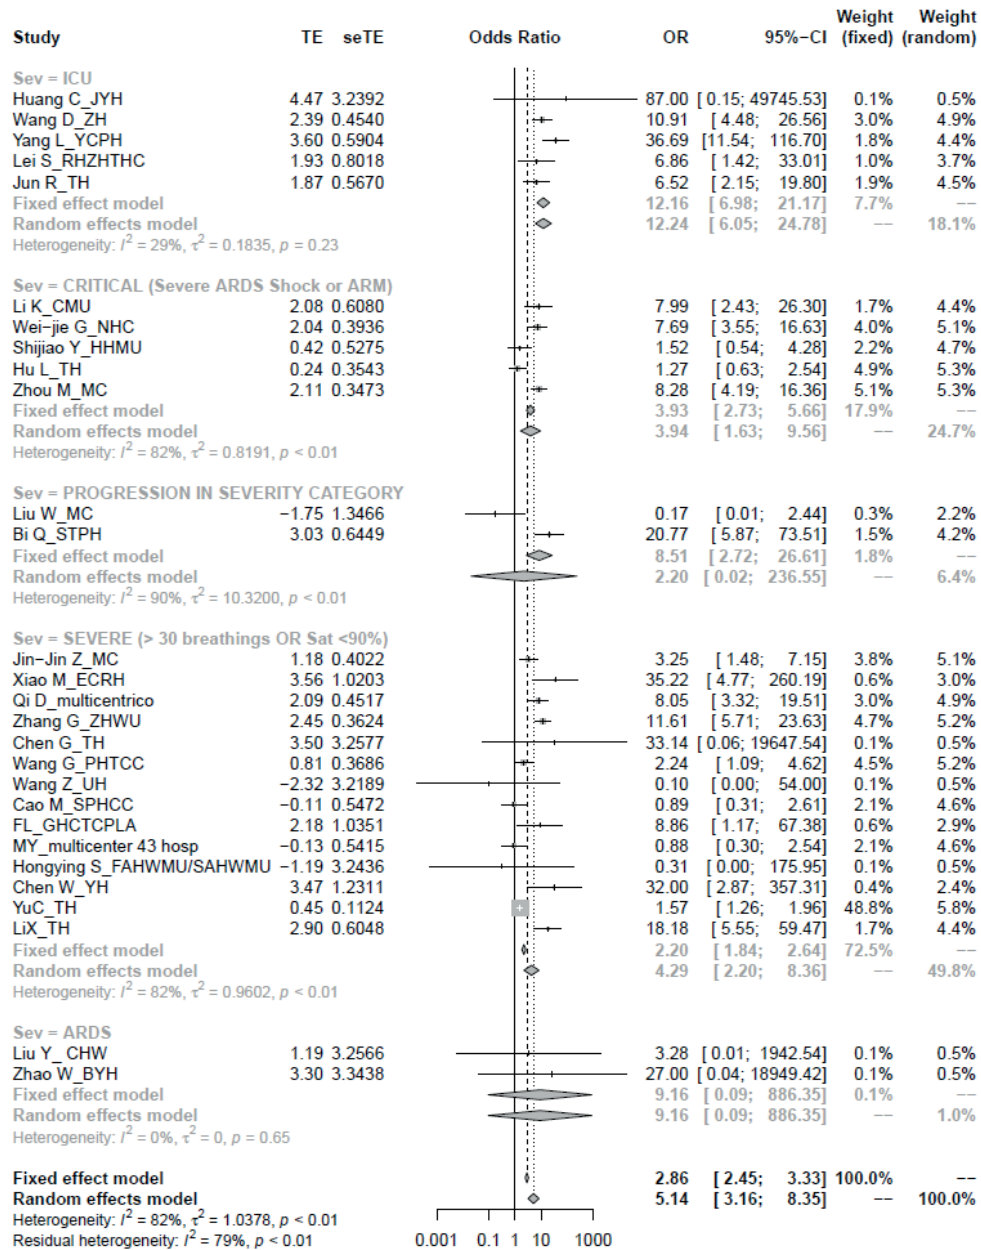

Candidate variable: High ALT level (more than 35-50 U/L), outcome: severe COVID-19 disease. subgroup analysis by COVID-19 severity definition

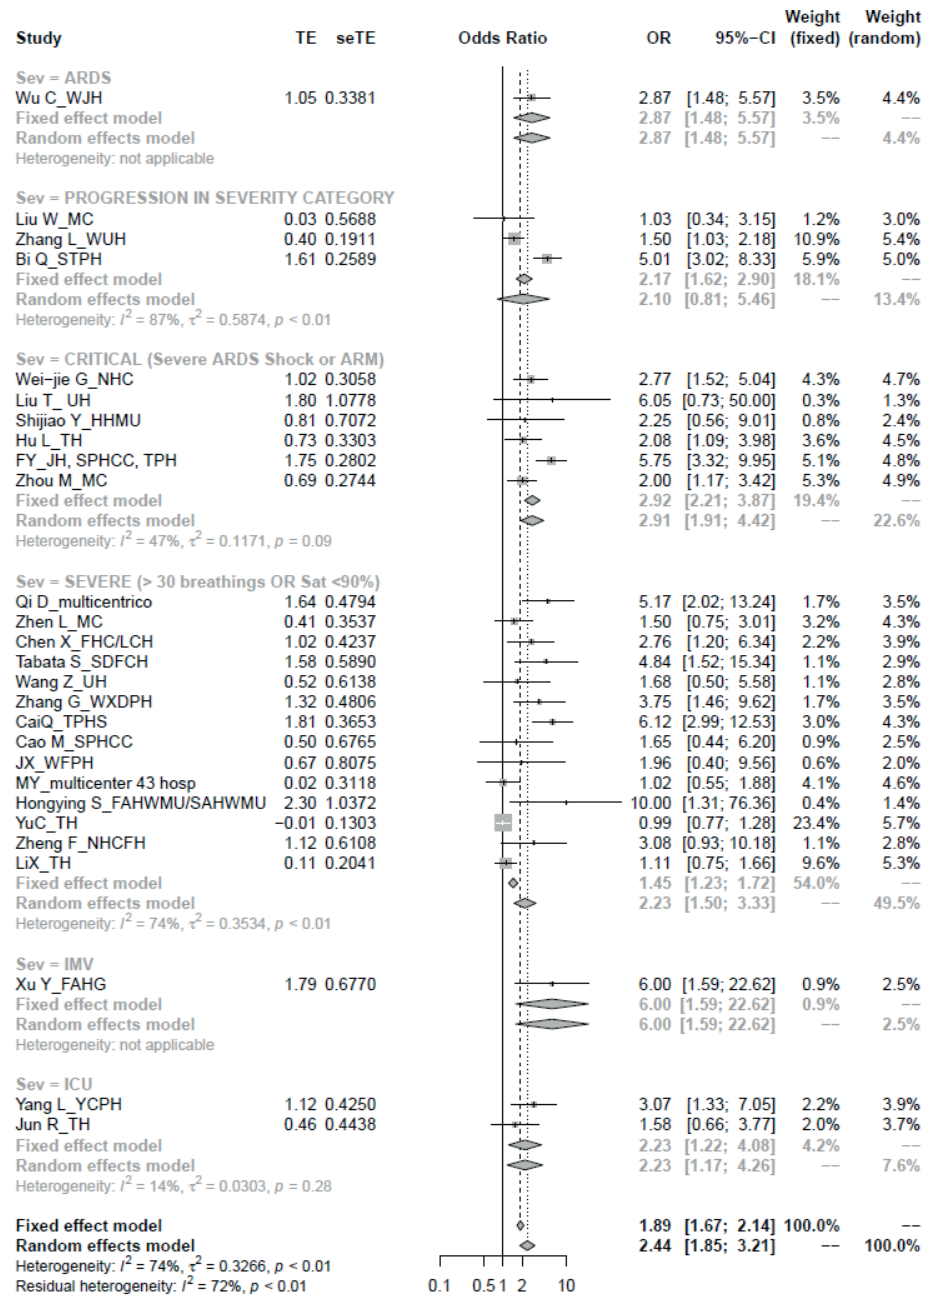

Candidate variable: ALT increase (per 1 U/L). outcome: severe COVID-19 disease. subgroup analysis by COVID-19 severity definition

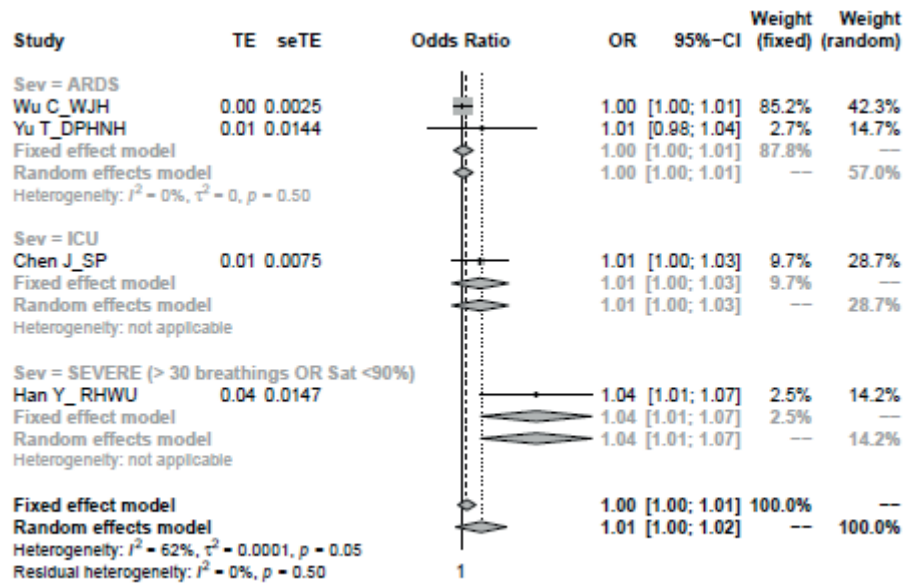

Candidate variable: High lactate (more than 1.5-2.2 mmol/L), outcome: severe COVID-19 disease, subgroup analysis by COVID-19 severity definition

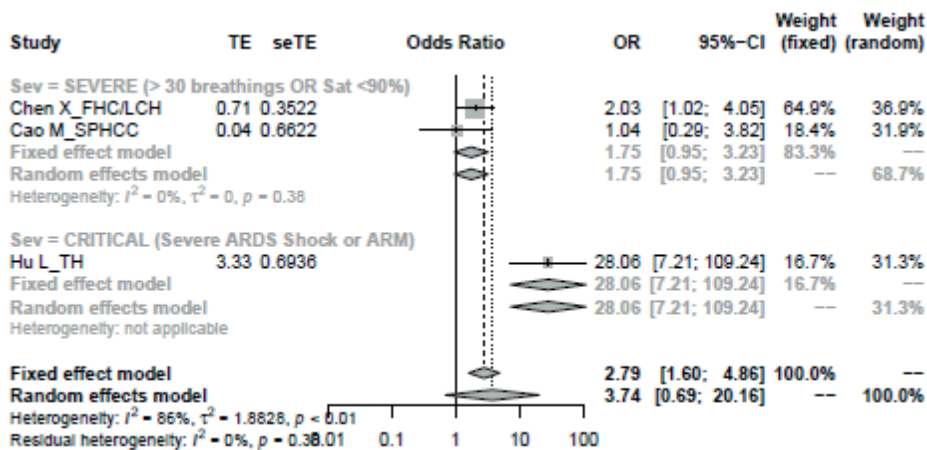

Candidate variable: Ground glass opacity. outcome: severe COVID-19 disease, subgroup analysis by COVID-19 severity definition

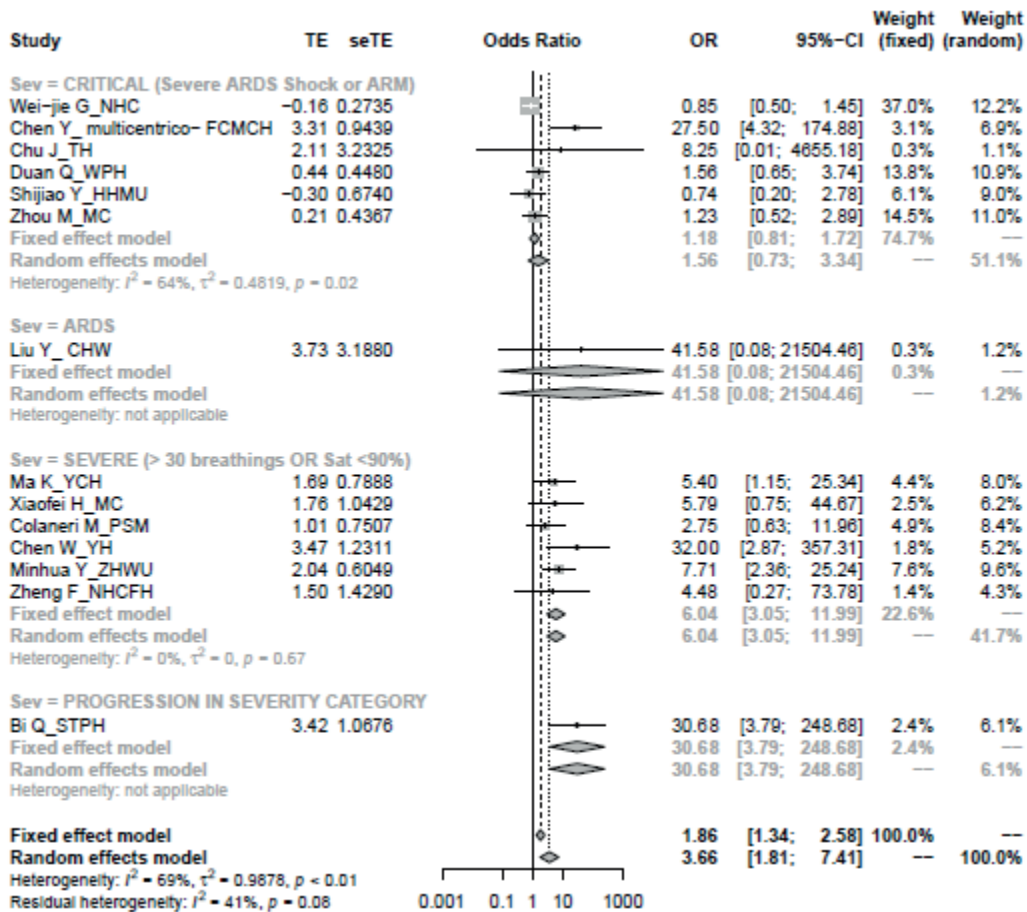

Candidate variable: Crazy paving pattern (CT assessment), outcome: severe COVID-19 disease, subgroup analysis by COVID-19 severity definition

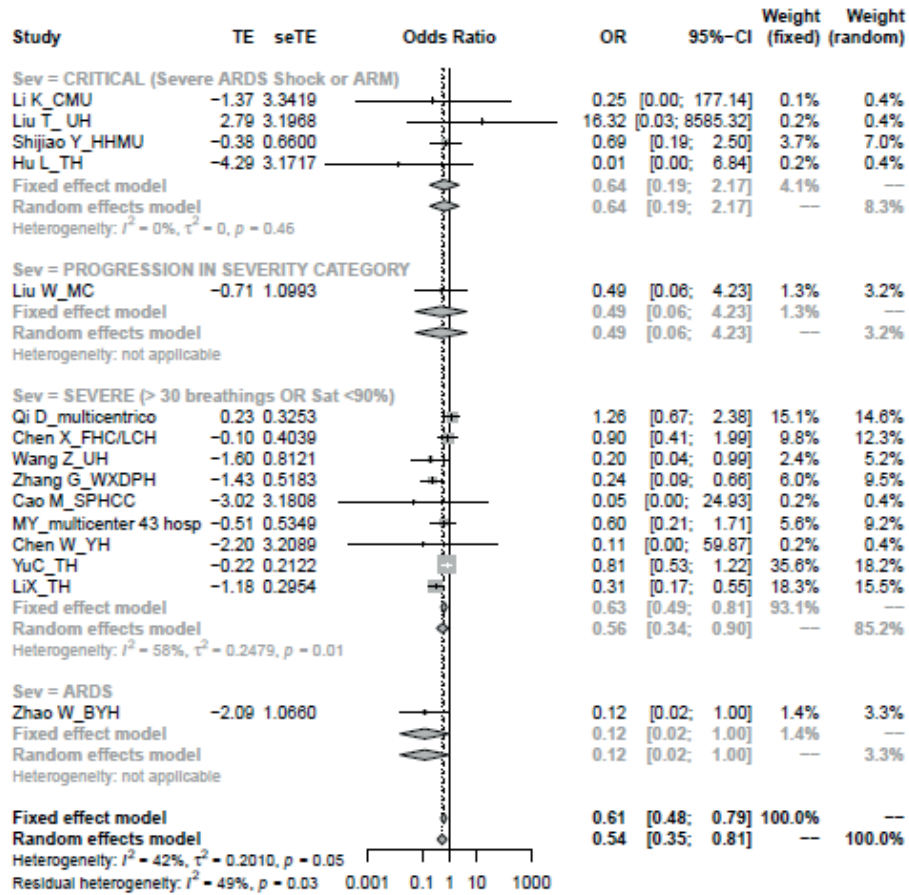

Candidate variable: Consolidation pattern, outcome: severe COVID-19 disease, subgroup analysis by COVID-19 severity definition

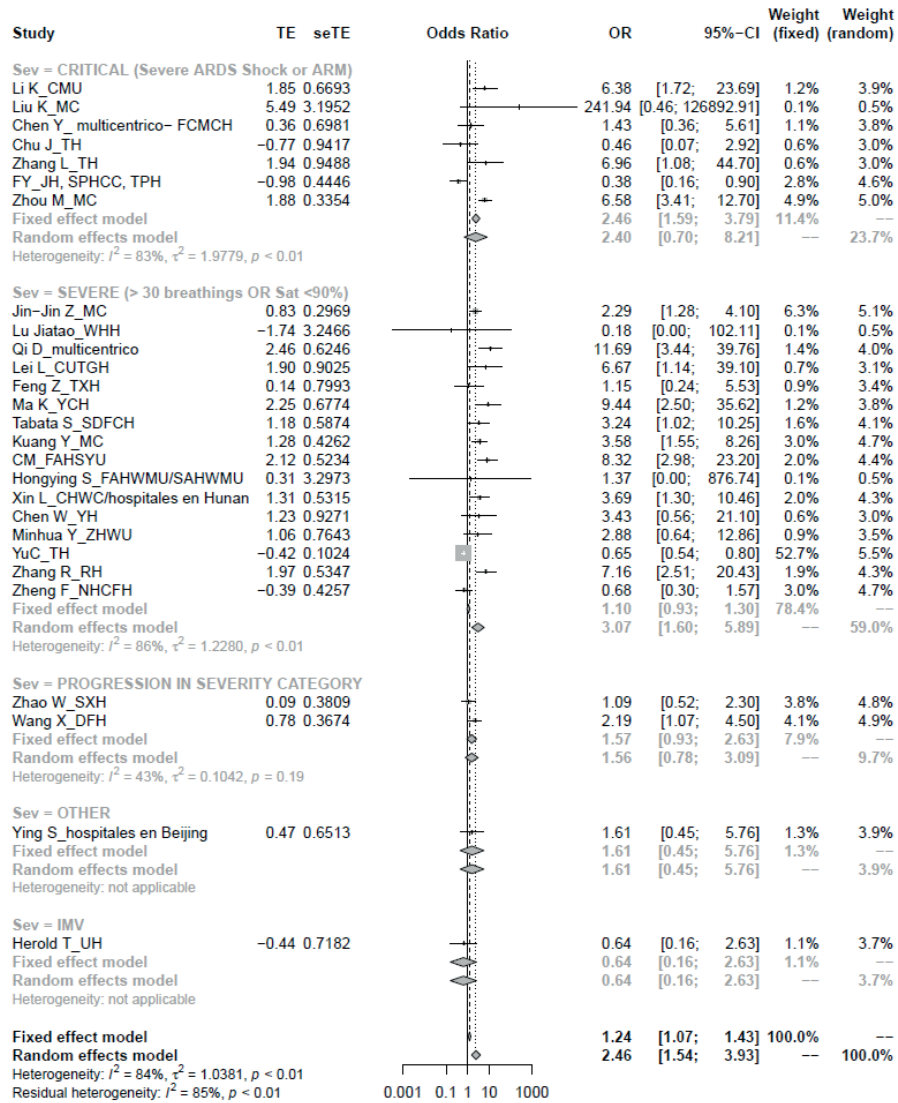

Candidate variable: Enlarged lymph nodes, outcome: severe COVID-19 disease, subgroup analysis by COVID-19 severity definition

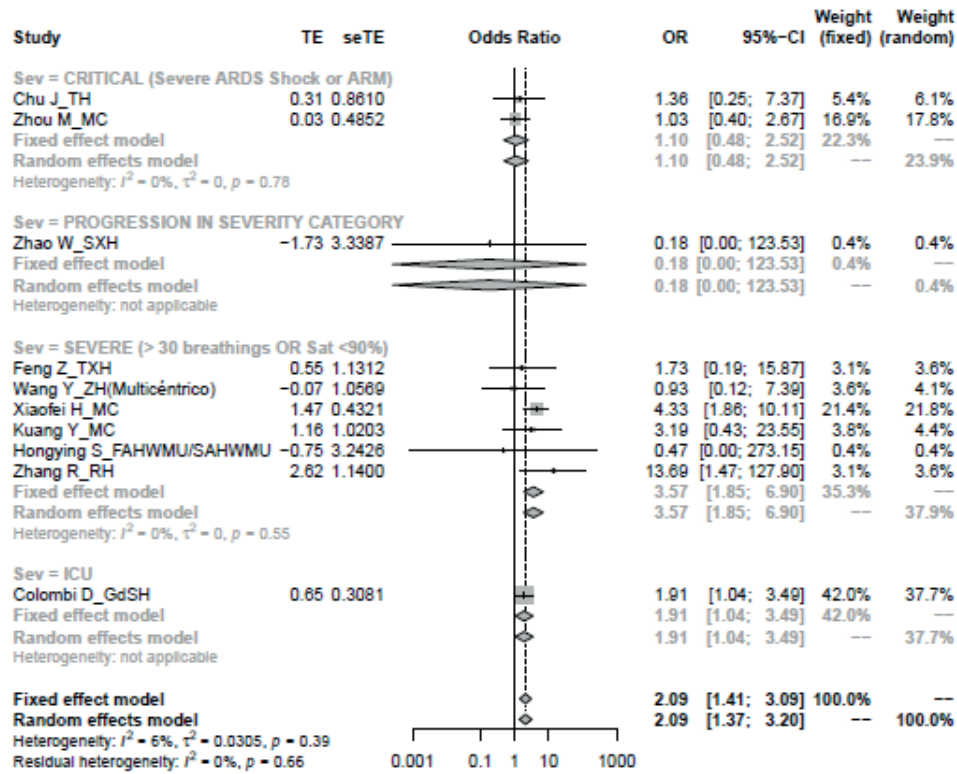

Candidate variable: Pleural effusion (X ray or CT assessment). outcome: severe COVID-19 disease, subgroup analysis by COVID-19 severity definition

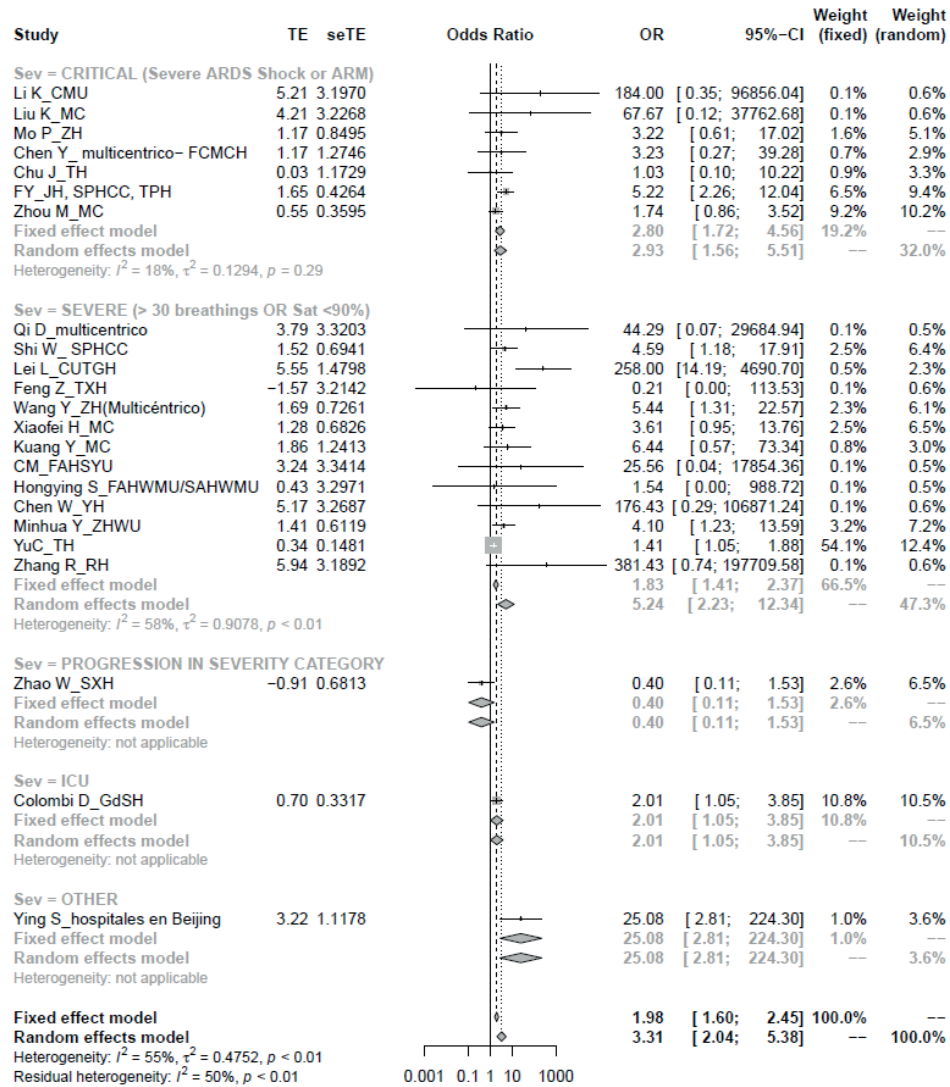



Candidate variable: Bilateral infiltrates. outcome: severe COVID-19 disease, subgroup analysis by COVID-19 severity definition

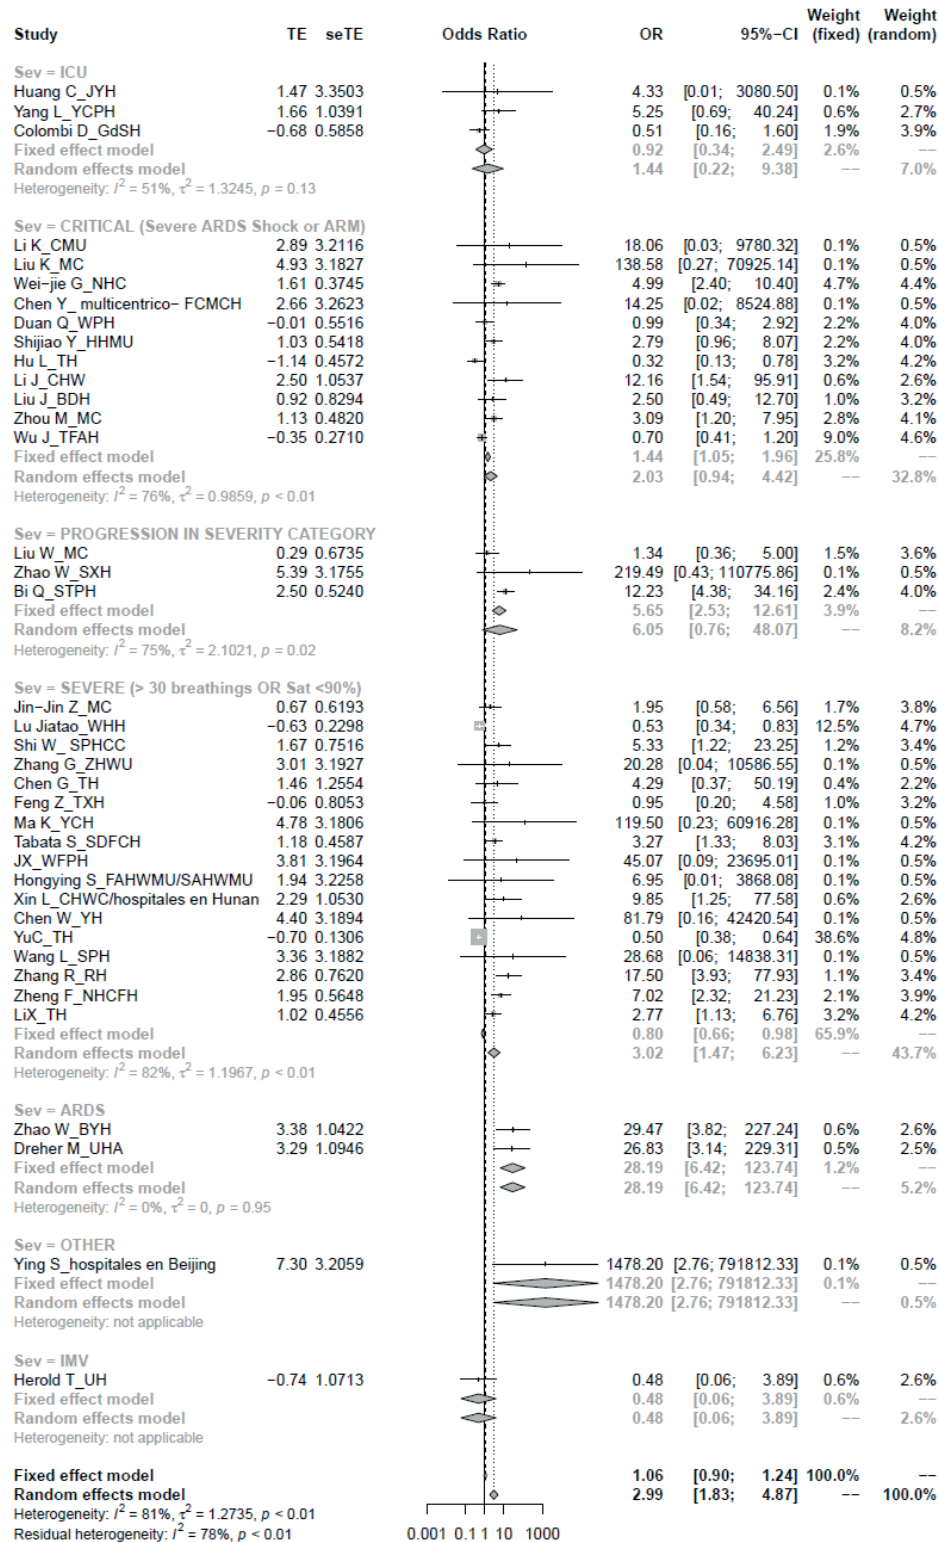

Candidate variable: High APACHE score (more than 8), outcome: severe COVID-19 disease. subgroup analysis by COVID-19 severity definition

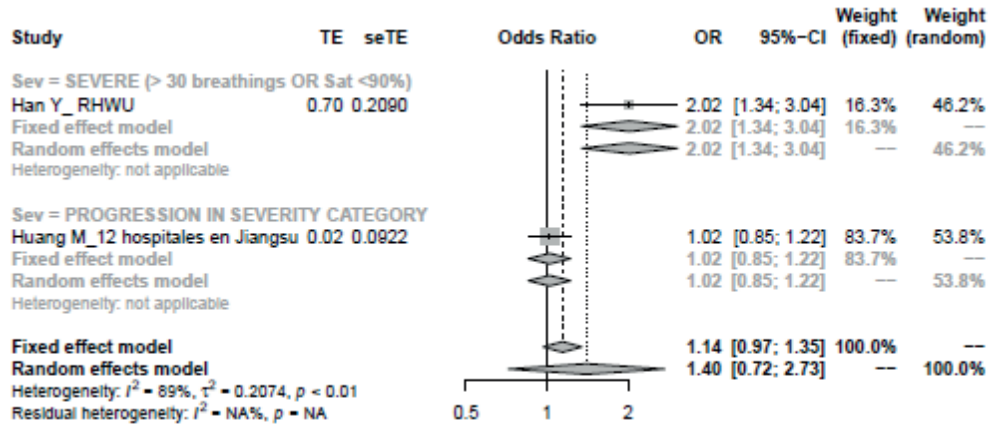

Supplement: pone.0241955.s008.pdf [file pone.0241955.s008.pdf]
