# Supplementary material for: Prognostic factors for severity and mortality in patients infected with COVID-19: A systematic review
Source: PubMed Central journal article supplement (PMC7671522; doi:10.1371/journal.pone.0241955), 2020-11-17
Supplement: pone.0241955.s001.pdf [file pone.0241955.s001.pdf]

Supplementary table 1. Characteristics of included studies

| Ref. nr | Author/s, year     | Center (country)                                                      | Number of participants | Population included |           |             | Candidate prognostic factors assessed |               |                   |                     |                | Outcomes  |                         |                                                                        | Adjusted analysis |
|---------|--------------------|-----------------------------------------------------------------------|------------------------|---------------------|-----------|-------------|---------------------------------------|---------------|-------------------|---------------------|----------------|-----------|-------------------------|------------------------------------------------------------------------|-------------------|
|         |                    |                                                                       |                        | Non-severe, %       | Severe, % | Critical, % | Social-Demographic                    | Comorbidities | Clinical findings | Laboratory findings | Image findings | Mortality | Severe COVID-19 disease | Severe COVID-19 definition                                             |                   |
| 30      | Argenziano M, 2020 | New York-Presbyterian/Columbia University Irving Medical Center (USA) | 1000                   | NR                  | NR        | NR          | Yes                                   | Yes           | Yes               | No                  | No             | No        | Yes                     | ICU                                                                    | No                |
| 31      | Auld S, 2020       | Three Emory Healthcare acute-care hospitals in Atlanta (USA)          | 181                    | 0                   | 0         | 100         | Yes                                   | Yes           | Yes               | Yes                 | No             | Yes       | No                      | NA                                                                     | No                |
| 32      | Bai T, 2020        | Jinyintan hospitals (China)                                           | 127                    | NR                  | NR        | NR          | Yes                                   | Yes           | Yes               | Yes                 | No             | Yes       | No                      | NA                                                                     | Yes               |
| 21      | Bai X, 2020        | Wuhan Pulmonary Hospital (China)                                      | 133                    | 100                 | 0         | 0           | Yes                                   | Yes           | Yes               | Yes                 | Yes            | Yes       | Yes                     | Severe ( $\geq 30$ breathings OR Sat $\leq 93\%$ OR OI $< 300$ OR ICU) | Yes               |
| 33      | Benelli G, 2020    | Hospital of Crema (Italy)                                             | 411                    | NR                  | NR        | NR          | Yes                                   | Yes           | Yes               | Yes                 | Yes            | Yes       | No                      | NA                                                                     | No                |

|    |              |                                                                                              |     |       |       |      |     |     |     |     |     |     |     |                                                                  |     |
|----|--------------|----------------------------------------------------------------------------------------------|-----|-------|-------|------|-----|-----|-----|-----|-----|-----|-----|------------------------------------------------------------------|-----|
| 24 | Bi Q, 2020   | Shenzhen Third People's Hospital (China)                                                     | 420 | 77.86 | 17.62 | 4.52 | Yes | Yes | Yes | Yes | Yes | No  | Yes | Progression in severity status                                   | Yes |
| 34 | Cai Q, 2020  | Third People's Hospital of Shenzhen (China)                                                  | 298 | 80.50 | 19.50 | 0    | Yes | Yes | Yes | Yes | Yes | Yes | Yes | Severe ( $\geq 30$ breathings OR OI $\leq 250$ OR IMV OR shock)  | Yes |
| 35 | Cao M, 2020  | Shanghai Public Health Clinical Centre (China)                                               | 198 | 90.40 | 9.60  | 0    | Yes | No  | Yes | Yes | Yes | No  | Yes | Severe ( $\geq 30$ breathings OR Sat $< 93\%$ OR OI $\leq 300$ ) | No  |
| 36 | Cao W, 2020  | Xiangyang No 1 Hospital, The Fourth affiliated Hospital of Hubei Medicine University (China) | 128 | 83    | 17    | 0    | Yes | Yes | Yes | Yes | Yes | No  | Yes | Severe ( $> 30$ breathings OR Sat $< 90\%$ )                     | No  |
| 37 | Chao C, 2020 | Ningbo First Hospital and Jingzhou Central Hospital (China)                                  | 58  | 100   | 0     | 0    | Yes | Yes | Yes | Yes | No  | No  | Yes | Progression in severity status                                   | Yes |
| 38 | Chen G, 2020 | Tongji Hospital (China)                                                                      | 21  | 47.62 | 52.38 | 0    | Yes | Yes | Yes | Yes | Yes | Yes | Yes | Severe ( $\geq 30$ breathings OR Sat $\leq 93\%$ )               | No  |

|    |                          |                                                                 |      |       |       |    |     |     |     |     |     |     |     |                                                                     |     |
|----|--------------------------|-----------------------------------------------------------------|------|-------|-------|----|-----|-----|-----|-----|-----|-----|-----|---------------------------------------------------------------------|-----|
| 39 | Chen J, Pan h, 2020      | First Affiliated Hospital of Wenzhou Medical University (China) | 46   | NR    | NR    | NR | Yes | Yes | Yes | Yes | Yes | No  | Yes | ICU                                                                 | No  |
| 40 | Chen J, Qi T, 2020       | Shanghai Public Health Clinical Center (China)                  | 249  | NR    | NR    | NR | Yes | Yes | Yes | Yes | Yes | Yes | Yes | ICU                                                                 | Yes |
| 41 | Chen L, 2020             | Tongji Hospital (China)                                         | 29   | 52    | 31    | 17 | Yes | Yes | Yes | Yes | Yes | No  | Yes | Severe ( $\geq 30$ breathings OR Sat $\leq 90\%$ OR OI $\leq 300$ ) | No  |
| 42 | Chen M, 2020             | Fifth Affiliated Hospital of Sun Yat-Sen University (China)     | 97   | 73.20 | 26.80 | 0  | Yes | Yes | Yes | Yes | Yes | No  | Yes | Severe (OI $\geq 150$ AND $\leq 300$ )                              | No  |
| 43 | Chen M, Yongzhen F, 2020 | Seventh Hospital of Wuhan City (China)                          | 123  | NR    | NR    | NR | Yes | Yes | Yes | Yes | No  | Yes | No  | NA                                                                  | Yes |
| 44 | Chen R, 2020             | 575 hospitals (China)                                           | 1590 | NR    | NR    | NR | Yes | Yes | Yes | Yes | No  | Yes | No  | NA                                                                  | Yes |
| 45 | Chen TL, 2020            | Zhongnan Hospital (China)                                       | 55   | NR    | NR    | NR | Yes | Yes | Yes | Yes | Yes | Yes | No  | Severe ( $> 30$ breathings OR Sat $< 93\%$ )                        | Yes |
| 46 | Chen W, 2020             | Yongwu Hospital (China)                                         | 74   | 88    | 12    | 0  | Yes | Yes | Yes | Yes | Yes | Yes | Yes | Severe ( $\geq 30$ breathings OR OI $\leq 250$ OR IMV OR shock)     | No  |

|    |                       |                                                                                          |     |       |       |       |     |     |     |     |     |     |     |                                                                                   |     |
|----|-----------------------|------------------------------------------------------------------------------------------|-----|-------|-------|-------|-----|-----|-----|-----|-----|-----|-----|-----------------------------------------------------------------------------------|-----|
| 47 | Chen X, Liu Z, 2020   | Tongji Hospital (China)                                                                  | 256 | NR    | NR    | NR    | Yes | Yes | Yes | Yes | No  | Yes | No  | NA                                                                                | No  |
| 48 | Chen X, Zhang Y 2020  | Guangzhou Eighth People's Hospital (China)                                               | 284 | 84    | 14    | 2     | Yes | Yes | Yes | Yes | No  | Yes | Yes | Severe (> 30 breathings OR Sat <90%)                                              | No  |
| 49 | Chen X, Zhao B 2020   | General Hospital of Central Theater Command, PLA, a designated hospital in Wuhan (China) | 48  | 43.75 | 20.83 | 35.42 | Yes | Yes | Yes | Yes | Yes | Yes | Yes | Severe (SOB, >30 breathings, Sat <93, OI<300) Critical (IMV, shock, ICU)          | No  |
| 50 | Chen X, Zheng F, 2020 | Hospital of Changshay Loudi Central Hospital (China)                                     | 291 | 82.82 | 17.18 | 0     | Yes | Yes | Yes | Yes | Yes | Yes | Yes | Severe (>= 30 breathings OR Sat <=93% OR OI <=300)                                | NO  |
| 51 | Chen Y, 2020          | Multicenter-Fourth Clinical Medical College of Hebei Medical University (China)          | 37  | 0     | 59    | 41    | Yes | Yes | Yes | Yes | Yes | No  | Yes | Critical (Respiratory failure or shock, or other organ failure that required ICU) | No  |
| 52 | Cheng Y, 2020         | Tongji Hospital (China)                                                                  | 710 | NR    | NR    | NR    | Yes | No  | Yes | Yes | No  | Yes | No  | NA                                                                                | No  |
| 53 | Chu J, 2020           | Tongji hospital (China)                                                                  | 54  | 20.37 | 74.07 | 5.56  | Yes | No  | Yes | No  | Yes | Yes | No  | NA                                                                                | No  |
| 54 | Colaneri M, 2020      | Policlinico San Matteo (Italia)                                                          | 44  | 61.36 | 38.64 | 0     | Yes | Yes | Yes | Yes | Yes | Yes | Yes | Severe (Sat <90%)                                                                 | Yes |

|    |                   |                                                              |      |       |       |     |     |     |     |     |     |     |     |                                                                           |     |
|----|-------------------|--------------------------------------------------------------|------|-------|-------|-----|-----|-----|-----|-----|-----|-----|-----|---------------------------------------------------------------------------|-----|
| 55 | Colombi D, 2020   | Guglielmo di Salicilato Hospital (Italia)                    | 236  | 54.24 | 45.76 | 0   | Yes | Yes | Yes | Yes | Yes | No  | Yes | ICU                                                                       | Yes |
| 56 | Cummings M, 2020  | 2 New York Presbyterian Hospitals (USA)                      | 257  | 0     | 0     | 100 | Yes | Yes | Yes | Yes | Yes | Yes | No  | NA                                                                        | Yes |
| 57 | Docherty AB, 2020 | 166 hospitals (UK)                                           | 6628 | NR    | NR    | NR  | Yes | Yes | Yes | No  | No  | Yes | No  | NA                                                                        | Yes |
| 23 | Dong J, 2020      | Fifth Medical Center of Chinese PLA General Hospital (China) | 208  | NR    | NR    | NR  | No  | Yes | Yes | Yes | No  | No  | No  | Severe ( $\geq 30$ breathings OR Sat $\leq 93\%$ OR OI $\leq 300$ OR IMV) | Yes |
| 58 | Dreher M, 2020    | University Hospital Aachen (Germany)                         | 50   | 0     | 52    | 48  | Yes | Yes | Yes | No  | Yes | Yes | Yes | ARDS                                                                      | No  |
| 59 | Du RH, 2020       | Wuhan Pulmonary Hospital (China)                             | 179  | 100   | 0     | 0   | Yes | Yes | Yes | Yes | No  | Yes | No  | NA                                                                        | No  |
| 60 | Duan Q, 2020      | Wuhan Pulmonary Hospital (China)                             | 116  | 100   | 0     | 0   | Yes | Yes | Yes | Yes | Yes | No  | Yes | Critical ( $> 30$ breathings OR ARDS OR Sat $< 93\%$ )                    | No  |
| 61 | Fan J, 2020       | Zhongnan Hospital (China)                                    | 21   | NR    | NR    | NR  | Yes | Yes | Yes | Yes | No  | Yes | No  | NA                                                                        | No  |

|    |              |                                                                                                                        |     |       |       |       |     |     |     |     |     |     |     |                                                                                                       |     |
|----|--------------|------------------------------------------------------------------------------------------------------------------------|-----|-------|-------|-------|-----|-----|-----|-----|-----|-----|-----|-------------------------------------------------------------------------------------------------------|-----|
| 62 | Fan T, 2020  | Renmin Hospital (China)                                                                                                | 317 | 51.73 | 11.99 | 36.28 | Yes | Yes | Yes | Yes | No  | No  | Yes | Severe (> 30 breathings OR Sat <90%)                                                                  | Yes |
| 63 | Fang L, 2020 | General Hospital of Central Theater Command of People's Liberation Army (China)                                        | 140 | 76.50 | 23.50 | 0     | Yes | Yes | Yes | Yes | No  | No  | Yes | Severe (>= 30 breathings OR Sat <=93% OR OI <= 300 OR lung images with progression > 50% in 24-48 hs) | Yes |
| 64 | Fei J, 2020  | Union Hospital of Huazhong University of Science and Technology (China)                                                | 192 | NR    | NR    | NR    | No  | No  | No  | Yes | No  | Yes | No  | Severe (OI <300)                                                                                      | Yes |
| 65 | Feng Y, 2020 | Jinyintan Hospital in Wuhan, Shanghai Public Health Clinical Center in Shanghai and Tongling People's Hospital (China) | 476 | 74    | 11    | 15    | Yes | Yes | Yes | Yes | Yes | Yes | Yes | Critical (IMV OR shock OR other organ failure with ICU requirement)                                   | No  |

|    |                            |                                                                                                               |     |       |       |       |     |     |     |     |     |     |     |                                                                     |     |
|----|----------------------------|---------------------------------------------------------------------------------------------------------------|-----|-------|-------|-------|-----|-----|-----|-----|-----|-----|-----|---------------------------------------------------------------------|-----|
| 66 | Feng Z, 2020               | Third Xiangya Hospital, Changsha Public Health Treatment Center and Second People's Hospital of Hunan (China) | 141 | 100   | 0     | 0     | Yes | Yes | Yes | Yes | Yes | No  | Yes | Severe (clinical progression)                                       | Yes |
| 67 | Fu L, Fei J, Xiang H, 2020 | Union Hospital of Huazhong University of Science and Technology (China)                                       | 200 | 44.10 | 29.70 | 26.20 | Yes | Yes | Yes | Yes | No  | Yes | No  | NA                                                                  | Yes |
| 68 | Fu L, Fei J, Xu S, 2020    | Union Hospital of Huazhong University (China)                                                                 | 350 | 60.30 | 25.10 | 14.60 | Yes | Yes | Yes | Yes | No  | Yes | No  | NA                                                                  | Yes |
| 69 | Gao L, 2020                | Hubei General Hospital (China)                                                                                | 54  | 0     | 100   | 0     | Yes | Yes | No  | Yes | No  | Yes | No  | Severe ( $\geq 30$ breathings OR Sat $\leq 93\%$ OR OI $\leq 300$ ) | Yes |
| 70 | Gao Y, 2020                | Fuyang Second People's Hospital (China)                                                                       | 43  | 100   | 0     | 0     | Yes | Yes | Yes | Yes | No  | No  | Yes | Severe ( $\geq 30$ breathings OR Sat $\leq 93\%$ OR OI $\leq 300$ ) | No  |
| 27 | Gong J, 2020               | Three Centers in Guangzhou and Wuhan (China)                                                                  | 372 | NR    | NR    | NR    | Yes | Yes | Yes | Yes | No  | No  | Yes | Severe ( $\geq 30$ breathings OR Sat $\leq 93\%$ OR OI $\leq 300$ ) | No  |

|    |                       |                                             |      |       |       |      |     |     |     |     |     |     |     |                                                                           |     |
|----|-----------------------|---------------------------------------------|------|-------|-------|------|-----|-----|-----|-----|-----|-----|-----|---------------------------------------------------------------------------|-----|
| 71 | Grasselli G, 2020     | Lombardy ICU Network (Italy)                | 1591 | 0     | 0     | 100  | Yes | Yes | Yes | Yes | Yes | Yes | No  | NA                                                                        | No  |
| 72 | Gu T, 2020            | 31 province-level regions (China)           | 275  | NR    | NR    | NR   | Yes | Yes | No  | No  | No  | Yes | No  | NA                                                                        | Yes |
| 73 | Guan W, Liang W, 2020 | 575 hospitals (China)                       | 1590 | NR    | NR    | NR   | Yes | Yes | Yes | No  | Yes | Yes | No  | NA                                                                        | No  |
| 74 | Guan W, Ni Z, 2020    | National Health Commission of China (China) | 1099 | 84.30 | 15.70 | 0    | Yes | Yes | Yes | Yes | Yes | No  | Yes | Severe (shock OR respiratory failure + IMV OR > 30 breathings OR OI <250) | No  |
| 75 | Guo T, 2020           | Seventh Hospital (China)                    | 187  | NR    | NR    | NR   | No  | No  | No  | Yes | No  | Yes | No  | NA                                                                        | No  |
| 76 | Guo TM, 2020          | Union Dongxihu Hospital (China)             | 118  | NR    | NR    | NR   | Yes | Yes | Yes | Yes | Yes | Yes | No  | NA                                                                        | Yes |
| 77 | Guo W, 2020           | Wuhan Union Hospital (China)                | 174  | NR    | NR    | NR   | No  | No  | No  | No  | No  | Yes | No  | NA                                                                        | No  |
| 78 | Han H, 2020           | Renmin Hospital (China)                     | 273  | 72.50 | 22    | 5.50 | Yes | No  | No  | Yes | No  | Yes | Yes | Critical (IMV OR shock OR other organ failure with ICU requirement)       | No  |



|    |                |                                                                            |     |       |       |      |     |     |     |     |     |     |     |                                                                               |     |
|----|----------------|----------------------------------------------------------------------------|-----|-------|-------|------|-----|-----|-----|-----|-----|-----|-----|-------------------------------------------------------------------------------|-----|
| 79 | Han M, 2020    | Second People's Hospital (China)                                           | 154 | 79.22 | 20.78 | 0    | Yes | Yes | Yes | Yes | No  | No  | Yes | Severe ( $\geq 30$ breathings OR Sat $\leq 93\%$ OR OI $\leq 300$ )           | No  |
| 80 | Han Y, 2020    | Renmin Hospital of Wuhan University (China)                                | 47  | 49    | 51    | 0    | Yes | Yes | Yes | Yes | Yes | No  | Yes | Severe (shock OR respiratory failure + IMV OR $>30$ breathings OR OI $<250$ ) | Yes |
| 81 | He W, 2020     | 3 hospitals (China)                                                        | 31  | 65    | 19    | 16   | Yes | Yes | Yes | Yes | Yes | Yes | No  | NA                                                                            | No  |
| 82 | He XW, 2020    | Tongji Hospital (China)                                                    | 56  | 0     | 55    | 45   | Yes | Yes | Yes | Yes | Yes | Yes | No  | NA                                                                            | No  |
| 83 | Herold T, 2020 | University Hospital (Germany)                                              | 40  | NR    | NR    | NR   | Yes | Yes | Yes | No  | Yes | No  | Yes | IMV                                                                           | No  |
| 84 | Hu B, 2020     | Zhongnan Hospital of Wuhan University and Wuhan Pulmonary Hospital (China) | 36  | 0     | 0     | 100  | Yes | Yes | Yes | Yes | No  | Yes | No  | NA                                                                            | Yes |
| 85 | Hu L, 2020     | Tianyou Hospital (China)                                                   | 323 | 46.75 | 45.20 | 8.05 | Yes | Yes | Yes | Yes | Yes | No  | Yes | Critical (Severe ARDS OR Shock OR IMV)                                        | Yes |

|    |                    |                                            |     |       |       |    |     |     |     |     |     |     |     |                                      |     |
|----|--------------------|--------------------------------------------|-----|-------|-------|----|-----|-----|-----|-----|-----|-----|-----|--------------------------------------|-----|
| 86 | Hu X, 2020         | Six hospitals of Chongqing (China)         | 164 | 83    | 17    | 0  | No  | No  | Yes | Yes | Yes | No  | Yes | Severe (> 30 breathings OR Sat <90%) | No  |
| 87 | Hu Z, 2020         | Tongji Hospital (China)                    | 95  | NR    | NR    | NR | Yes | Yes | Yes | Yes | Yes | Yes | No  | NA                                   | No  |
| 88 | Huang C, 2020      | Jin Yin-tan Hospital (China)               | 41  | 31.70 | 68.30 | 0  | Yes | Yes | Yes | Yes | Yes | No  | Yes | ICU                                  | No  |
| 89 | Huang H, 2020      | Guangzhou Eighth People's Hospital (China) | 125 | 74    | 26    | 0  | Yes | Yes | Yes | Yes | No  | No  | Yes | Severe (> 30 breathings OR Sat <90%) | Yes |
| 90 | Huang M, 2020      | 12 hospitals (China)                       | 60  | 0     | 100   | 0  | Yes | Yes | Yes | Yes | Yes | Yes | Yes | Progression in severity status       | No  |
| 91 | Jiang X, 2020      | Wuxi Fifth People's Hospital (China)       | 55  | 85.50 | 14.50 | 0  | Yes | Yes | Yes | Yes | Yes | No  | Yes | Severe (> 30 breathings OR Sat <90%) | No  |
| 92 | Jin JM, 2020       | Wuhan Union Hospital (China)               | 43  | NR    | NR    | NR | Yes | Yes | Yes | Yes | No  | Yes | No  | NA                                   | No  |
| 93 | Jin X, 2020        | Multicenter in Zhejiang province (China)   | 651 | 90    | 10    | 0  | Yes | Yes | Yes | Yes | Yes | No  | Yes | Severe (> 30 breathings OR Sat <90%) | No  |
| 94 | Kalligeros M, 2020 | 3 hospitals (USA)                          | 103 | 57    | 43    | 0  | Yes | Yes | No  | No  | No  | No  | Yes | ICU                                  | Yes |

|    |               |                                                                                                                                 |      |       |       |      |     |     |     |     |     |     |     |                                      |                                      |    |
|----|---------------|---------------------------------------------------------------------------------------------------------------------------------|------|-------|-------|------|-----|-----|-----|-----|-----|-----|-----|--------------------------------------|--------------------------------------|----|
| 95 | Kuang Y, 2020 | Taizhou Hospital Enze district, Wenling First People's Hospital, Sanmen People's Hospital and Tiantai People's Hospital (China) | 143  | 76.92 | 23.08 | 0    | Yes | No  | Yes | Yes | Yes | Yes | Yes | Yes                                  | Severe (> 30 breathings OR Sat <90%) | No |
| 96 | Lee H, 2020   | Seoul National University College of Medicine (Korea)                                                                           | 8266 | NR    | NR    | NR   | Yes | Yes | No  | No  | No  | Yes | No  | NA                                   | Yes                                  |    |
| 97 | Lei L, 2020   | Chongqing University Three Gorges Hospital (China)                                                                              | 51   | 86.30 | 7.80  | 5.90 | Yes | Yes | Yes | Yes | Yes | No  | Yes | Severe (> 30 breathings OR Sat <90%) | No                                   |    |
| 98 | Lei S. 2020   | Renmin Hospital, Zhongnan Hospital, Tongji Hospital and Central Hospital (China)                                                | 34   | 56    | 44    | 0    | Yes | Yes | Yes | Yes | No  | No  | Yes | ICU                                  | No                                   |    |
| 99 | Li H. 2020    | Tianyou Hospital (China)                                                                                                        | 132  | 46    | 42    | 12   | Yes | No  | Yes | Yes | Yes | Yes | Yes | Severe (> 30 breathings OR Sat <90%) | No                                   |    |

|     |                    |                                                             |     |       |       |       |     |     |     |     |      |     |     |                                        |     |
|-----|--------------------|-------------------------------------------------------------|-----|-------|-------|-------|-----|-----|-----|-----|------|-----|-----|----------------------------------------|-----|
| 100 | Li J, Long X, 2020 | Wuhan Red Cross Hospital (China)                            | 161 | NR    | NR    | NR    | Yes | Yes | Yes | Yes | Yes  | Yes | No  | NA                                     | No  |
| 101 | Li J, Meng L, 2020 | Central Hospital of Wuhan (China)                           | 134 | 34    | 22    | 44    | Yes | Yes | Yes | Yes | Yees | Yes | Yes | Critical (Severe ARDS OR Shock OR IMV) | Yes |
| 102 | Li J, Wang X, 2020 | Central Hospital of Wuhan (China)                           | 362 | 52    | 48    | 0     | Yes | Yes | No  | No  | No   | Yes | No  | Severe (> 30 breathings OR Sat <90%)   | No  |
| 103 | Li K, 2020         | Affiliated Hospital of Chongqing Medical University (China) | 83  | 69.90 | 30.10 | 0     | Yes | Yes | Yes | Yes | Yes  | No  | Yes | Critical (Severe ARDS OR Shock OR IMV) | No  |
| 25  | Li X, 2020         | Sino-French New City Branch of Tongji Hospital (China)      | 548 | 51    | 49    | 0     | Yes | Yes | Yes | Yes | Yes  | Yes | Yes | Severe (> 30 breathings OR Sat <90%)   | Yes |
| 104 | Li Y, 2020         | Tongji Hospital (China)                                     | 77  | 76.63 | 5.19  | 18.18 | Yes | Yes | Yes | Yes | Yes  | No  | No  | NA                                     | Yes |
| 105 | Li YK, 2020        | Tongji Hospital (China)                                     | 25  | 64    | 36    | 0     | Yes | Yes | Yes | Yes | No   | Yes | Yes | Severe (> 30 breathings OR Sat <90%)   | No  |
| 106 | Lian J, 2020       | Health Commission of Zhejiang province (China)              | 788 | 90.10 | 7.74  | 2.16  | No  | No  | No  | No  | No   | No  | Yes | Severe (> 30 breathings OR Sat <90%)   | No  |

|     |                    |                                                                                                          |      |       |       |      |     |     |     |     |     |     |     |                                        |    |
|-----|--------------------|----------------------------------------------------------------------------------------------------------|------|-------|-------|------|-----|-----|-----|-----|-----|-----|-----|----------------------------------------|----|
| 107 | Liang W, 2020      | 575 hospitals (China)                                                                                    | 1590 | 100   | 0     | 0    | No  | No  | No  | No  | No  | No  | Yes | Critical (Severe ARDS OR Shock OR IMV) | No |
| 108 | Liao X, 2020       | Sichuan Provincial Department of Health (China)                                                          | 81   | 0     | 100   | 0    | No  | No  | No  | No  | No  | No  | Yes | IMV                                    | No |
| 109 | Liu F, 2020        | Xixi hospital (China)                                                                                    | 10   | 70    | 30    | 0    | Yes | Yes | Yes | Yes | Yes | No  | Yes | Progression in severity status         | No |
| 110 | Liu J, 2020        | Jinyintan Hospital (China)                                                                               | 122  | 35    | 65    | 0    | No  | Yes | Yes | Yes | Yes | Yes | Yes | Severe (> 30 breathings OR Sat <90%)   | No |
| 111 | Liu J, Li S, 2020  | Wuhan Union Hospital and Tongji Medical College of Huazhong University of Science and Technology (China) | 40   | 67.50 | 32.50 | 0    | Yes | Yes | Yes | Yes | No  | Yes | Yes | Severe (> 30 breathings OR Sat <90%)   | No |
| 112 | Liu J, Liu Y, 2020 | Beijing Ditan Hospital (China)                                                                           | 61   | 72    | 28    | 0    | Yes | Yes | Yes | Yes | Yes | No  | Yes | Critical (Severe ARDS OR Shock OR IMV) | No |
| 113 | Liu KC, 2020       | 6 Hospitals in Anhui (China)                                                                             | 73   | 67.12 | 28.77 | 4.11 | Yes | No  | Yes | No  | Yes | No  | Yes | Critical (Severe ARDS OR Shock OR IMV) | No |

|     |                           |                                      |     |       |       |      |     |     |     |     |     |     |     |                                        |     |
|-----|---------------------------|--------------------------------------|-----|-------|-------|------|-----|-----|-----|-----|-----|-----|-----|----------------------------------------|-----|
| 114 | Liu R, 2020               | Central Hospital of Wuhan (China)    | 41  | NR    | NR    | NR   | Yes | Yes | Yes | Yes | Yes | No  | Yes | IMV                                    | Yes |
| 115 | Liu T, 2020               | Union Hospital (China)               | 80  | 13.75 | 86.25 | 0    | Yes | Yes | Yes | Yes | Yes | No  | Yes | Critical (Severe ARDS OR Shock OR IMV) | No  |
| 116 | Liu W, 2020               | 1 tertiary hospital in Wuhan (China) | 78  | 89.74 | 10.26 | 0    | No  | No  | No  | No  | No  | No  | Yes | Progression in severity status         | Yes |
| 117 | Liu Y, 2020               | Shangai Pulmonary Hospital (China)   | 221 | 83.70 | 12.20 | 4.10 | No  | Yes | Yes | Yes | Yes | No  | Yes | Severe (> 30 breathings OR Sat <90%)   | No  |
| 118 | Liu Y, Bi L, 2020         | Shenyang Chest Hospital (China)      | 36  | 75    | 25    | 0    | Yes | Yes | Yes | Yes | No  | No  | Yes | Severe (> 30 breathings OR Sat <90%)   | No  |
| 119 | Liu Y, Du X, 2020         | Hospital of Wuhan University (China) | 245 | 97    | 3     | 0    | Yes | Yes | Yes | Yes | Yes | Yes | No  | NA                                     | Yes |
| 120 | Liu Y, Sun W, Guo Y, 2020 | Central Hospital of Wuhan (China)    | 383 | NR    | NR    | NR   | No  | No  | No  | No  | No  | Yes | No  | NA                                     | Yes |
| 121 | Liu Y, Sun W, Li J, 2020  | Central Hospital of Wuhan (China)    | 109 | 51.40 | 48.60 | 0    | Yes | Yes | Yes | Yes | Yes | No  | Yes | ARDS                                   | No  |

|     |                     |                                                                     |     |       |       |    |     |     |     |     |     |     |     |                                                     |     |
|-----|---------------------|---------------------------------------------------------------------|-----|-------|-------|----|-----|-----|-----|-----|-----|-----|-----|-----------------------------------------------------|-----|
| 122 | Liu Y, Yang Y, 2020 | Shenzen Third People's Hospital (China)                             | 12  | NR    | NR    | NR | Yes | Yes | Yes | Yes | Yes | No  | Yes | Critical (Severe ARDS OR Shock OR IMV)              | No  |
| 123 | Lu J, 2020          | Wuhan Hankou Hospital (China)                                       | 438 | 77    | 23    | 0  | Yes | Yes | Yes | Yes | Yes | Yes | Yes | Severe (SOB + >30 breathings OR Sat <93 OR OI <300) | Yes |
| 124 | Luo XM, 2020        | Renmin Hospital (China)                                             | 298 | 47.30 | 52.70 | 0  | Yes | Yes | Yes | Yes | No  | Yes | No  | NA                                                  | Yes |
| 125 | Luo XM, 2020        | Renmin Hospital (China)                                             | 403 | 49.10 | 50.90 | 0  | Yes | Yes | Yes | Yes | NR  | Yes | Yes | Severe (> 30 breathings OR Sat <90%)                | No  |
| 126 | Lv X, 2020          | Central Hospital of Wuhan City and other hospitals in Hunan (China) | 208 | 73.56 | 26.44 | 0  | Yes | Yes | Yes | Yes | Yes | Yes | Yes | Severe (> 30 breathings OR Sat <90%)                | No  |
| 127 | Ma J, 2020          | Renmin Hospital of Wuhan University (China)                         | 37  | 46    | 54    | 0  | Yes | Yes | Yes | Yes | No  | No  | Yes | Progression in severity status                      | No  |
| 128 | Ma K, 2020          | Yongchuan Hospital (China)                                          | 84  | 76    | 24    | 0  | Yes | Yes | Yes | Yes | Yes | No  | Yes | Severe (> 30 breathings OR Sat <90%)                | Yes |
| 129 | Ma Y, 2020          | 43 hospitals in 10 provinces (China)                                | 635 | 90    | 10    | 0  | Yes | Yes | Yes | Yes | Yes | No  | Yes | Severe (> 30 breathings OR Sat <90%)                | No  |

|     |                  |                                                                                    |      |       |       |       |     |     |     |     |     |     |     |                                                                         |     |
|-----|------------------|------------------------------------------------------------------------------------|------|-------|-------|-------|-----|-----|-----|-----|-----|-----|-----|-------------------------------------------------------------------------|-----|
| 130 | Mehra MR, 2020   | 169 hospitals (Asia, Europe and North America)                                     | 8910 | NR    | NR    | NR    | Yes | Yes | No  | No  | No  | Yes | No  | NA                                                                      | Yes |
| 131 | Mo P, 2020       | Zhongnan Hospital (China)                                                          | 155  | 40.60 | 35.50 | 23.90 | Yes | Yes | Yes | Yes | Yes | No  | Yes | Critical (Severe ARDS OR Shock OR IMV)                                  | Yes |
| 132 | Niu S, 2020      | Beijing Emergency Medical Center, (China)                                          | 141  | 69    | 31    | 0     | Yes | Yes | Yes | No  | No  | Yes | Yes | Severe (> 30 breathings OR Sat <90%)                                    | No  |
| 133 | Pan L, 2020      | Wuhan Hanan Hospital, Wuhan Union Hospital, and Huanggang Central Hospital (China) | 103  | 65.70 | 0     | 34.30 | Yes | Yes | Yes | Yes | No  | No  | Yes | Critical (Severe ARDS OR Shock OR IMV)                                  | No  |
| 134 | Paranjpe I, 2020 | MSHCS (USA)                                                                        | 1078 | NR    | NR    | NR    | Yes | Yes | Yes | Yes | No  | Yes | No  | ICU                                                                     | No  |
| 135 | Peng YD, 2020    | Wuhan Union Hospital (China)                                                       | 112  | 85.71 | 14.29 | 0     | Yes | Yes | Yes | Yes | No  | Yes | Yes | Severe (SOB, >30 breathings, Sat<93, OII<300) Critical IMV, shock, ICU) | No  |
| 136 | Qi D, 2020       | 3 hospitals in Chongqing (China)                                                   | 267  | 81.27 | 18.73 | 0     | Yes | Yes | Yes | Yes | Yes | No  | Yes | Severe (> 30 breathings OR Sat <90%)                                    | No  |



|     |                  |                                                                                  |      |       |       |    |     |     |     |     |     |     |     |                                                                     |     |
|-----|------------------|----------------------------------------------------------------------------------|------|-------|-------|----|-----|-----|-----|-----|-----|-----|-----|---------------------------------------------------------------------|-----|
| 137 | Qi X, 2020       | 5 designated hospitals in Ankang, Lishui, Zhenjiang, Lanzhou, and Linxia (China) | 31   | NR    | NR    | NR | Yes | Yes | Yes | Yes | Yes | No  | Yes | OTHER (Long term stay ->10 days)                                    | No  |
| 138 | Qin X, 2020      | Shishou People's Hospital (China)                                                | 89   | 60.70 | 39.30 | 0  | Yes | Yes | Yes | Yes | No  | No  | Yes | ICU                                                                 | No  |
| 139 | Qu R, 2020       | Huizhou Municipal Central Hospital (China)                                       | 30   | NR    | NR    | NR | Yes | Yes | Yes | Yes | Yes | No  | Yes | Severe (SOB, >30 breathings, Sat <93, OI <300,) Critical (IMV, ICU) | No  |
| 140 | Ran J, 2020      | Tongji Hospital (China)                                                          | 144  | 77.78 | 22.22 | 0  | Yes | Yes | Yes | Yes | No  | No  | Yes | ICU                                                                 | Yes |
| 141 | Rentsch CT, 2020 | Veteran Affairs (USA)                                                            | 419  | NR    | NR    | NR | Yes | Yes | Yes | Yes | No  | No  | Yes | ICU                                                                 | Yes |
| 142 | Rossi PG, 2020   | Reggio Emilia, (Italy)                                                           | 2242 | NR    | NR    | NR | Yes | Yes | No  | No  | No  | Yes | No  | NA                                                                  | Yes |
| 143 | Ruan Q, 2020     | Jin Yin-tan Hospital and Tongji Hospital (China)                                 | 150  | NR    | NR    | NR | NR  | NR  | NR  | NR  | NR  | Yes | No  | NA                                                                  | No  |
| 144 | Sakar J, 2020    | CSIR-Indian Institute of Chemical Biology (India)                                | 222  | NR    | NR    | NR | No  | No  | No  | No  | No  | Yes | No  | NA                                                                  | No  |

|     |              |                                                                                 |     |       |       |    |     |     |     |     |     |     |     |                                      |     |
|-----|--------------|---------------------------------------------------------------------------------|-----|-------|-------|----|-----|-----|-----|-----|-----|-----|-----|--------------------------------------|-----|
| 145 | Shi H, 2020  | The First and Second affiliated Hospitals of Wenzhou Medical University (China) | 148 | 80.40 | 19.60 | 0  | Yes | Yes | Yes | Yes | Yes | Yes | Yes | Severe (> 30 breathings OR Sat <90%) | Yes |
| 146 | Shi S, 2020  | Renmin Hospital (China)                                                         | 416 | NR    | NR    | NR | Yes | Yes | Yes | Yes | No  | Yes | No  | NA                                   | Yes |
| 147 | Shi W, 2020  | Shanghai Public Health Clinical Center (China)                                  | 196 | 77    | 14    | 9  | Yes | Yes | Yes | Yes | Yes | No  | Yes | Severe (> 30 breathings OR Sat <90%) | No  |
| 148 | Shi Y, 2020  | Cohort from Zhejiang Province (China)                                           | 487 | 89.94 | 10.06 | 0  | Yes | Yes | No  | No  | No  | No  | Yes | NA                                   | Yes |
| 149 | Song C, 2020 | First Affiliated Hospital, School of Medicine, Zhejiang University (China)      | 73  | 43    | 57    | 0  | Yes | Yes | Yes | Yes | No  | No  | Yes | Severe (> 30 breathings OR Sat <90%) | No  |
| 150 | Sun F, 2020  | Zhongnan Hospital (China)                                                       | 165 | 84.24 | 15.76 | 0  | Yes | Yes | Yes | Yes | No  | No  | Yes | Severe (> 30 breathings OR Sat <90%) | No  |

|     |                    |                                                     |     |       |       |       |     |     |     |     |     |     |     |                                      |     |
|-----|--------------------|-----------------------------------------------------|-----|-------|-------|-------|-----|-----|-----|-----|-----|-----|-----|--------------------------------------|-----|
| 151 | Sun X, 2020        | Peking Union Medical College Hospital (China)       | 69  | 0     | 0     | 100   | Yes | Yes | Yes | Yes | No  | Yes | No  | NA                                   | No  |
| 152 | Sun Y, 2020        | Hospitals in Beijing (China)                        | 63  | 69.80 | 15.90 | 14.30 | Yes | Yes | Yes | Yes | Yes | No  | Yes | OTHER                                | Yes |
| 153 | Tabata S, 2020     | Self-Defense Forces Central Hospital (Japan)        | 104 | 80.70 | 19.30 | 0     | Yes | Yes | Yes | Yes | Yes | No  | Yes | Severe (> 30 breathings OR Sat <90%) | Yes |
| 154 | Tan L, 2020        | General Hospital of Central Theater Command (China) | 30  | NR    | NR    | NR    | Yes | Yes | Yes | Yes | Yes | Yes | No  | NA                                   | No  |
| 155 | Tang N, 2020       | Tongji Hospital (China)                             | 183 | NR    | NR    | NR    | Yes | NR  | NR  | Yes | NR  | Yes | No  | NA                                   | No  |
| 156 | Tian S, 2020       | 57 hospitals (China)                                | 262 | 82.44 | 17.56 | 0     | Yes | No  | Yes | No  | No  | Yes | Yes | Severe (> 30 breathings OR Sat <90%) | No  |
| 157 | Tu WJ, 2020        | Zhongnan Hospital (China)                           | 174 | NR    | NR    | NR    | Yes | Yes | Yes | Yes | No  | Yes | No  | NA                                   | No  |
| 158 | Wan S, 2020        | Three Gorges Hospital (China)                       | 123 | 83    | 17    | 0     | Yes | Yes | Yes | Yes | Yes | Yes | Yes | Severe (> 30 breathings OR Sat <90%) | No  |
| 159 | Wang D, Hu B, 2020 | Zhongnan Hospital (China)                           | 138 | 73.91 | 0     | 26.09 | Yes | Yes | Yes | Yes | Yes | No  | Yes | ICU                                  | No  |

|     |                     |                                                    |      |       |       |       |     |     |     |     |     |     |     |                                                                                  |     |
|-----|---------------------|----------------------------------------------------|------|-------|-------|-------|-----|-----|-----|-----|-----|-----|-----|----------------------------------------------------------------------------------|-----|
| 160 | Wang D, Yin Y, 2020 | Wuhan and Xishui Hospital (China)                  | 107  | NR    | NR    | NR    | Yes | Yes | Yes | Yes | Yes | Yes | No  | NA                                                                               | Yes |
| 161 | Wang G, 2020        | Public Health Treatment Center of Changsha (China) | 242  | 84.71 | 15.29 | 0     | Yes | Yes | Yes | Yes | Yes | No  | Yes | Severe ( $\geq 30$ breathings OR Sat $\leq 93\%$ OR OI $\leq 300$ OR IMV OR ICU) | No  |
| 162 | Wang L, 2020        | Renmin Hospital (China)                            | 339  | 29.50 | 46.90 | 23.60 | No  | Yes | Yes | Yes | No  | Yes | Yes | NA                                                                               | No  |
| 163 | Wang L, 2020 (2)    | People's Hospital of Wuhan University (China)      | 202  | 38    | 38    | 24    | Yes | Yes | No  | Yes | No  | Yes | No  | NA                                                                               | Yes |
| 164 | Wang L, Li X, 2020  | Renmin Hospital (China)                            | 116  | 50.80 | 39.70 | 9.50  | Yes | Yes | No  | No  | No  | No  | No  | ARDS                                                                             | No  |
| 165 | Wang L, Zou A, 2020 | Shanghai Pulmonary Hospital (China)                | 90   | 85    | 15    | 0     | Yes | Yes | Yes | Yes | Yes | No  | Yes | Severe ( $> 30$ breathings OR Sat $< 90\%$ )                                     | No  |
| 166 | Wang R, 2020        | N° 2 People's Hospital of Fuyang City (China)      | 125  | 80    | 20    | 0     | Yes | Yes | Yes | Yes | Yes | No  | Yes | Critical (Severe ARDS OR Shock OR IMV)                                           | No  |
| 167 | Wang X, 2020        | Dongxihu Fangcang Hospital (China)                 | 1012 | NR    | NR    | NR    | Yes | Yes | Yes | Yes | Yes | Yes | Yes | Progression in severity status                                                   | No  |

|     |                      |                                                        |     |       |       |     |     |     |     |     |     |     |     |                                                                                                                   |     |
|-----|----------------------|--------------------------------------------------------|-----|-------|-------|-----|-----|-----|-----|-----|-----|-----|-----|-------------------------------------------------------------------------------------------------------------------|-----|
| 168 | Wang Y, 2020         | 24 hospitals in Jiangsu province (China)               | 620 | 91.45 | 8.55  | 0   | Yes | Yes | Yes | Yes | Yes | No  | Yes | Severe (> 30 breathings OR Sat <90%)                                                                              | Si  |
| 169 | Wang Y, Lu X, 2020   | Tongji Hospital (China)                                | 344 | 0     | 0     | 100 | Yes | Yes | Yes | Yes | Yes | Yes | No  | NA                                                                                                                | No  |
| 170 | Wang Y, Zhou Y, 2020 | The Central Hospital of Wuhan (China)                  | 110 | 65.45 | 34.55 | 0   | No  | Yes | Yes | Yes | No  | No  | Yes | Severe (> 30 breathings OR Sat <90%)                                                                              | Yes |
| 171 | Wang Z, 2020         | Union Hospital (China)                                 | 69  | 79.70 | 20.30 | 0   | Yes | Yes | Yes | Yes | No  | Yes | No  | Severe (> 30 breathings OR Sat <90%)                                                                              | No  |
| 172 | Wen C, 2020          | Jinyintan Hospital (China)                             | 61  | NR    | NR    | NR  | Yes | Yes | Yes | Yes | No  | Yes | No  | NA                                                                                                                | Yes |
| 173 | Wen Y, 2020          | National Infectious Disease Information System (China) | 417 | 92    | 0     | 8   | Yes | Yes | Yes | Yes | No  | No  | Yes | Severe (>30 breathings, Sat ≤93%, OI <300 and/or lung infiltrates >50%)<br>Critical (Severe ARDS OR Shock OR IMV) | Yes |
| 174 | Whang S, 2020        | Multicenter. Fujian province (China)                   | 165 | 83    | 14    | 3   | Yes | No  | No  | No  | No  | No  | Yes | Critical (Severe ARDS OR Shock OR IMV)                                                                            | No  |

|     |                           |                                                                                           |     |       |       |    |     |     |     |     |     |     |     |                                        |     |
|-----|---------------------------|-------------------------------------------------------------------------------------------|-----|-------|-------|----|-----|-----|-----|-----|-----|-----|-----|----------------------------------------|-----|
| 175 | Wu C, 2020                | Wuhan Jinyintan Hospital (China)                                                          | 201 | 17.90 | 82.10 | 0  | Yes | Yes | Yes | Yes | No  | No  | Yes | ARDS                                   | No  |
| 176 | Wu J, 2020                | The First Affiliated Hospital (China)                                                     | 280 | 70    | 0     | 30 | Yes | Yes | Yes | Yes | Yes | Yes | No  | Critical (Severe ARDS OR Shock OR IMV) | Yes |
| 177 | Xie H, 2020               | Wuhan Jinyintan Hospital (China)                                                          | 79  | 65    | 35    | 0  | Yes | Yes | Yes | No  | No  | No  | No  | Severe (> 30 breathings OR Sat <90%)   | No  |
| 178 | Xie J, Covassin N, 2020   | Union Hospital, (China)                                                                   | 140 | 31    | 52    | 17 | Yes | Yes | Yes | Yes | No  | Yes | Yes | Severe (> 30 breathings OR Sat <90%)   | Yes |
| 179 | Xie J, Hungerford D, 2020 | Tongji Hospital and Jinyintan Hospital (China)                                            | 444 | NR    | NR    | NR | Yes | Yes | Yes | Yes | No  | Yes | No  | NA                                     | Yes |
| 180 | Xu S, 2020                | Union Hospital of Huazhong University and Second People's Hospital of Fuyang City (China) | 200 | 63    | 17    | 20 | Yes | Yes | Yes | Yes | No  | Yes | No  | NA                                     | Yes |
| 181 | Xu W, 2020                | Affiliated Infectious Diseases Hospital (China)                                           | 87  | 50    | 46    | 4  | Yes | Yes | Yes | Yes | No  | No  | Yes | OTHER                                  | No  |



|     |                      |                                                                                      |      |       |       |     |     |     |     |     |     |     |     |                                      |     |
|-----|----------------------|--------------------------------------------------------------------------------------|------|-------|-------|-----|-----|-----|-----|-----|-----|-----|-----|--------------------------------------|-----|
| 190 | Yang X, Yang Q, 2020 | Jinyintan Hospital (China)                                                           | 1476 | NR    | NR    | NR  | Yes | No  | No  | Yes | No  | Yes | No  | NA                                   | No  |
| 191 | Yang X, Yu Y, 2020   | Wuhan Jin Yintan Hospital (China)                                                    | 52   | 0     | 0     | 100 | Yes | Yes | Yes | Yes | No  | Yes | No  | NA                                   | No  |
| 192 | Yin Y, 2020          | 3 hospitals (China)                                                                  | 112  | 0     | 0     | 100 | Yes | Yes | No  | Yes | No  | Yes | No  | NA                                   | Yes |
| 193 | Young B E, 2020      | 4 hospitals (Singapur)                                                               | 18   | 100   | 0     | 0   | Yes | No  | Yes | Yes | Yes | Yes | Yes | Severe (Sat <92)                     | No  |
| 194 | Yu C, 2020           | Tongji Hospital (China)                                                              | 1663 | 48.50 | 51.50 | 0   | Yes | Yes | Yes | Yes | Yes | Yes | Yes | Severe (> 30 breathings OR Sat <90%) | No  |
| 195 | Yu M, 2020           | Zhongnan Hospital of Wuhan University (China)                                        | 70   | 71    | 29    | 0   | Yes | Yes | Yes | No  | Yes | Yes | No  | Severe (> 30 breathings OR Sat <90%) | No  |
| 196 | Yu T, 2020           | Dongguan People's Hospital and Nanfang Hospital, Southern Medical University (China) | 95   | 100   | 0     | 0   | Yes | Yes | Yes | Yes | No  | No  | Yes | ARDS                                 | Yes |
| 197 | Yuan M, 2020         | Central Hospital of Wuhan (China)                                                    | 27   | 100   | 0     | 0   | Yes | Yes | Yes | No  | Yes | Yes | No  | NA                                   | No  |



|     |                        |                                                  |     |       |       |    |     |     |     |     |     |     |     |                                      |     |
|-----|------------------------|--------------------------------------------------|-----|-------|-------|----|-----|-----|-----|-----|-----|-----|-----|--------------------------------------|-----|
| 198 | Zang L, 2020           | Wuhan Asia General Hospital (China)              | 343 | NR    | NR    | NR | Yes | Yes | No  | Yes | No  | Yes | No  | NA                                   | No  |
| 199 | Zeng L, 2020           | Shenzhen Third People's hospital (China)         | 338 | 100   | 0     | 0  | Yes | Yes | Yes | Yes | Yes | Yes | Yes | Severe (> 30 breathings OR Sat <90%) | Yes |
| 200 | Zeng Z, 2020           | Hankou Hospital (China)                          | 274 | NR    | NR    | NR | No  | Yes | No  | No  | No  | Yes | Yes | Severe (> 30 breathings OR Sat <90%) | No  |
| 201 | Zhang F, 2020          | Wuhan No.1 Hospital (China)                      | 48  | 54.20 | 45.80 | 0  | Yes | Yes | Yes | Yes | No  | Yes | No  | NA                                   | Yes |
| 202 | Zhang G, Chang H, 2020 | Zhongnan Hospital (China)                        | 221 | 75.11 | 24.89 | 0  | Yes | Yes | Yes | Yes | Yes | Yes | Yes | Severe (> 30 breathings OR Sat <90%) | No  |
| 203 | Zhang G, Zhang J, 2020 | Wuhan Xinzhou District People's Hospital (China) | 95  | 66.32 | 33.68 | 0  | Yes | No  | Yes | Yes | No  | No  | Yes | Severe (> 30 breathings OR Sat <90%) | No  |
| 204 | Zhang H, 2020          | Chongqing Public Health Medical Center (China)   | 43  | 67.44 | 32.56 | 0  | Yes | Yes | Yes | Yes | No  | No  | Yes | Severe (> 30 breathings OR Sat <90%) | No  |

|     |                              |                                                                                                        |     |       |       |       |     |     |     |     |     |     |     |                                         |     |
|-----|------------------------------|--------------------------------------------------------------------------------------------------------|-----|-------|-------|-------|-----|-----|-----|-----|-----|-----|-----|-----------------------------------------|-----|
| 205 | Zhang HY<br>2020             | Zhongnan Hospital, the Fifth Hospital of Wuhan, the Seventh Hospital of Wuhan, Hankou Hospital (China) | 67  | 52.20 | 47.80 | 0     | Yes | Yes | Yes | Yes | No  | Yes | Yes | Severe (dyspnea or respiratory failure) | No  |
| 206 | Zhang J,<br>2020             | Liyuan Hospital (China)                                                                                | 19  | 0     | 100   | 0     | Yes | No  | Yes | Yes | Yes | Yes | No  | NA                                      | No  |
| 207 | Zhang JJ,<br>2020            | Zhongnan Hospital of Wuhan University, (China)                                                         | 140 | 59    | 41    | 0     | Yes | Yes | Yes | Yes | Yes | No  | Yes | Severe (> 30 breathings OR Sat <90%)    | No  |
| 208 | Zhang L, Tao B,<br>2020      | Wuhan Union Hospital (China)                                                                           | 514 | 54.86 | 31.52 | 13.62 | No  | Yes | Yes | Yes | Yes | No  | No  | Progression in severity status          | No  |
| 209 | Zhang L, Tao B,<br>2020 (2)  | Xiaohua Hou Wuhan Union Hospital (China)                                                               | 564 | NR    | NR    | NR    | No  | Yes | Yes | Yes | No  | Yes | Yes | Severe (> 30 breathings OR Sat <90%)    | No  |
| 210 | Zhang L,<br>Wenwu S,<br>2020 | Central Hospital of Wuhan (China)                                                                      | 319 | NR    | NR    | NR    | Yes | Yes | Yes | Yes | No  | No  | No  | NA                                      | Yes |

|     |                       |                                                                                                |      |       |       |       |     |     |     |     |     |     |     |                                        |     |
|-----|-----------------------|------------------------------------------------------------------------------------------------|------|-------|-------|-------|-----|-----|-----|-----|-----|-----|-----|----------------------------------------|-----|
| 211 | Zhang L, Zhu F, 2020  | Tongji Sino-French New Town Hospital, Union Red Cross Hospital and Union West Hospital (China) | 28   | NR    | NR    | NR    | Yes | Yes | Yes | Yes | Yes | No  | Yes | Critical (Severe ARDS OR Shock OR IMV) | Yes |
| 212 | Zhang P, 2020         | Nine hospitals in Hubei (China)                                                                | 1128 | NR    | NR    | NR    | Yes | Yes | Yes | Yes | Yes | Yes | No  | NA                                     | Yes |
| 213 | Zhang R, 2020         | Renmin Hospital (China)                                                                        | 120  | 75    | 25    | 0     | Yes | Yes | Yes | Yes | Yes | Yes | Yes | Severe (> 30 breathings OR Sat <90%)   | Yes |
| 214 | Zhang S, 2020         | Wuhan Union Hospital West Area (China)                                                         | 315  | 43.49 | 56.51 | 0     | Yes | Yes | Yes | Yes | Yes | Yes | No  | NA                                     | Yes |
| 215 | Zhang S, Zhao J, 2020 | Jinyintan Hospital (China)                                                                     | 262  | NR    | NR    | NR    | Yes | Yes | Yes | Yes | Yes | Yes | Yes | Critical (Severe ARDS OR Shock OR IMV) | No  |
| 216 | Zhang X, Guo W, 2020  | 11 hospitals (China)                                                                           | 282  | NR    | NR    | NR    | Yes | Yes | Yes | No  | No  | Yes | No  | NA                                     | Yes |
| 217 | Zhang X, Huan C 2020  | Hospitals in Zhejiang province (China)                                                         | 645  | NR    | NR    | NR    | Yes | Yes | Yes | Yes | Yes | No  | Yes | Severe (> 30 breathings OR Sat <90%)   | No  |
| 218 | Zhang Y, 2020         | West Court of Union Hospital of Huazhong (China)                                               | 258  | 33.71 | 44.97 | 21.32 | Yes | Yes | Yes | Yes | Yes | Yes | Yes | Critical (Severe ARDS OR Shock OR IMV) | Yes |

|     |               |                                                                |     |       |       |       |     |     |     |     |     |     |     |                                        |     |
|-----|---------------|----------------------------------------------------------------|-----|-------|-------|-------|-----|-----|-----|-----|-----|-----|-----|----------------------------------------|-----|
| 219 | Zhao W, 2020  | Second Xiangya Hospital (China)                                | 118 | 91.53 | 8.47  | 0     | Yes | Yes | Yes | Yes | Yes | Yes | Yes | Progression in severity status         | No  |
| 220 | Zhao W, 2020  | Beijing YouAn Hospital (China)                                 | 77  | 74    | 26    | 0     | Yes | Yes | Yes | Yes | Yes | No  | Yes | ARDS                                   | No  |
| 221 | Zhen L, 2020  | Four hospitals in Hubei province and Chongqing city (China)    | 258 | 66.32 | 33.68 | 0     | Yes | Yes | Yes | Yes | Yes | Yes | Yes | Severe (> 30 breathings OR Sat <90%)   | No  |
| 222 | Zheng F, 2020 | North Hospital of Changsha First Hospital (China)              | 161 | 81    | 19    | 0     | Yes | Yes | Yes | Yes | Yes | No  | Yes | Severe (> 30 breathings OR Sat <90%)   | No  |
| 223 | Zheng X, 2020 | Fifth Affiliated Hospital of Sun Yat-Sen University (China)    | 52  | 58    | 42    | 0     | Yes | Yes | Yes | Yes | Yes | No  | Yes | ICU                                    | Yes |
| 224 | Zhou B, 2020  | First Affiliated Hospital of Xi'an Jiaotong University (China) | 34  | 0     | 77    | 23    | No  | No  | Yes | Yes | No  | No  | Yes | Critical (Severe ARDS OR Shock OR IMV) | No  |
| 225 | Zhou F, 2020  | Jinyintan Hospital and Wuhan Pulmonary Hospital (China)        | 191 | 37.70 | 34.55 | 27.75 | Yes | Yes | Yes | Yes | No  | Yes | No  | NA                                     | Yes |

|     |                        |                                            |     |       |       |    |     |     |     |     |     |     |     |                                        |     |
|-----|------------------------|--------------------------------------------|-----|-------|-------|----|-----|-----|-----|-----|-----|-----|-----|----------------------------------------|-----|
| 226 | Zhou H, 2020           | Wuhan Union Hospital (China)               | 230 | NR    | NR    | NR | No  | yes | Yes | Yes | No  | No  | No  | ICU                                    | No  |
| 227 | Zhou H, Wanxin C, 2020 | Union Hospital (China)                     | 271 | 89    | 11    | 0  | Yes | Yes | Yes | Yes | No  | Yes | Yes | ICU                                    | No  |
| 228 | Zhou M, 2020           | 3 hospitals (China)                        | 240 | 0     | 53    | 47 | Yes | Yes | Yes | Yes | Yes | Yes | No  | Critical (Severe ARDS OR Shock OR IMV) | Yes |
| 229 | Zhou Y, 2020           | Central Hospital of Wuhan (China)          | 377 | 68.97 | 31.03 | 0  | Yes | Yes | Yes | Yes | No  | No  | Yes | Severe (> 30 breathings OR Sat <90%)   | Yes |
| 230 | Zhu B, 2020            | Beijing Tiantan Hospital (China)           | 107 | NR    | NR    | NR | No  | Yes | No  | Yes | No  | Yes | No  | NA                                     | Yes |
| 231 | Zhu Q, 2020            | Wuhan University Zhongnan Hospital (China) | 325 | NR    | NR    | NR | No  | Yes | Yes | Yes | Yes | No  | No  | NA                                     | Yes |

### **Glossary**

NA: Not Applicable

ICU: Intensive Care Unit

Sat: oxygen saturation

OI: Oxygenation Index

IMV: invasive mechanical ventilation

SOB: Shortness of Breath

ARDS: Adult Respiratory Distress Syndrome
