# Supplementary material for: Prognostic factors for severity and mortality in patients infected with COVID-19: A systematic review
Source: PubMed Central journal article supplement (PMC7671522; doi:10.1371/journal.pone.0241955), 2020-11-17
Supplement: pone.0241955.s002.pdf [file pone.0241955.s002.pdf]

**Table S2. Risk of bias of included studies**

| Ref. nr. | Author             | Study participation | Study Attrition Summary | Prognostic Factor Measurement | Outcome Measurement Summary | Study Confounding Summary | Statistical Analysis and Presentation Summary | Overall risk of bias |
|----------|--------------------|---------------------|-------------------------|-------------------------------|-----------------------------|---------------------------|-----------------------------------------------|----------------------|
| 30       | Argenziano M, 2020 | ●                   | ●                       | ●                             | ●                           | ●                         | ●                                             | ●                    |
| 31       | Auld S, 2020       | ●                   | ●                       | ●                             | ●                           | ●                         | ●                                             | ●                    |
| 32       | Bai T, 2020        | ●                   | ●                       | ●                             | ●                           | ●                         | ●                                             | ●                    |
| 21       | Bai X, 2020        | ●                   | ●                       | ●                             | ●                           | ●                         | ●                                             | ●                    |
| 33       | Benelli G, 2020    | ●                   | ●                       | ●                             | ●                           | ●                         | ●                                             | ●                    |
| 24       | Bi Q, 2020         | ●                   | ●                       | ●                             | ●                           | ●                         | ●                                             | ●                    |
| 34       | Cai Q, 2020        | ●                   | ●                       | ●                             | ●                           | ●                         | ●                                             | ●                    |

● = High risk of bias, ● = Moderate risk of bias, ● = Low risk of bias

| Ref. nr. | Author                   | Study participation | Study Attrition Summary | Prognostic Factor Measurement | Outcome Measurement Summary | Study Confounding Summary | Statistical Analysis and Presentation Summary | Overall risk of bias |
|----------|--------------------------|---------------------|-------------------------|-------------------------------|-----------------------------|---------------------------|-----------------------------------------------|----------------------|
| 35       | Cao M, 2020              | ●                   | ●                       | ●                             | ●                           | ●                         | ●                                             | ●                    |
| 36       | Cao W, 2020              | ●                   | ●                       | ●                             | ●                           | ●                         | ●                                             | ●                    |
| 37       | Chao C, 2020             | ●                   | ●                       | ●                             | ●                           | ●                         | ●                                             | ●                    |
| 38       | Chen G, 2020             | ●                   | ●                       | ●                             | ●                           | ●                         | ●                                             | ●                    |
| 39       | Chen J, Pan h, 2020      | ●                   | ●                       | ●                             | ●                           | ●                         | ●                                             | ●                    |
| 40       | Chen J, Qi T, 2020       | ●                   | ●                       | ●                             | ●                           | ●                         | ●                                             | ●                    |
| 41       | Chen L, 2020             | ●                   | ●                       | ●                             | ●                           | ●                         | ●                                             | ●                    |
| 42       | Chen M, 2020             | ●                   | ●                       | ●                             | ●                           | ●                         | ●                                             | ●                    |
| 43       | Chen M, Yongzhen F, 2020 | ●                   | ●                       | ●                             | ●                           | ●                         | ●                                             | ●                    |
| 44       | Chen R, 2020             | ●                   | ●                       | ●                             | ●                           | ●                         | ●                                             | ●                    |

● = High risk of bias, ● = Moderate risk of bias, ● = Low risk of bias

| Ref. nr. | Author                | Study participation | Study Attrition Summary | Prognostic Factor Measurement | Outcome Measurement Summary | Study Confounding Summary | Statistical Analysis and Presentation Summary | Overall risk of bias |
|----------|-----------------------|---------------------|-------------------------|-------------------------------|-----------------------------|---------------------------|-----------------------------------------------|----------------------|
| 45       | Chen TL, 2020         | ●                   | ●                       | ●                             | ●                           | ●                         | ●                                             | ●                    |
| 46       | Chen W, 2020          | ●                   | ●                       | ●                             | ●                           | ●                         | ●                                             | ●                    |
| 47       | Chen X, Liu Z, 2020   | ●                   | ●                       | ●                             | ●                           | ●                         | ●                                             | ●                    |
| 48       | Chen X, Zhang Y 2020  | ●                   | ●                       | ●                             | ●                           | ●                         | ●                                             | ●                    |
| 49       | Chen X, Zhao B 2020   | ●                   | ●                       | ●                             | ●                           | ●                         | ●                                             | ●                    |
| 50       | Chen X, Zheng F, 2020 | ●                   | ●                       | ●                             | ●                           | ●                         | ●                                             | ●                    |
| 51       | Chen Y, 2020          | ●                   | ●                       | ●                             | ●                           | ●                         | ●                                             | ●                    |
| 52       | Cheng Y, 2020         | ●                   | ●                       | ●                             | ●                           | ●                         | ●                                             | ●                    |
| 53       | Chu J, 2020           | ●                   | ●                       | ●                             | ●                           | ●                         | ●                                             | ●                    |
| 54       | Colaneri M, 2020      | ●                   | ●                       | ●                             | ●                           | ●                         | ●                                             | ●                    |
| 55       | Colombi D, 2020       | ●                   | ●                       | ●                             | ●                           | ●                         | ●                                             | ●                    |

● = High risk of bias, ● = Moderate risk of bias, ● = Low risk of bias

| Ref. nr. | Author            | Study participation | Study Attrition Summary | Prognostic Factor Measurement | Outcome Measurement Summary | Study Confounding Summary | Statistical Analysis and Presentation Summary | Overall risk of bias |
|----------|-------------------|---------------------|-------------------------|-------------------------------|-----------------------------|---------------------------|-----------------------------------------------|----------------------|
| 56       | Cummings M, 2020  | ●                   | ●                       | ●                             | ●                           | ●                         | ●                                             | ●                    |
| 57       | Docherty AB, 2020 | ●                   | ●                       | ●                             | ●                           | ●                         | ●                                             | ●                    |
| 23       | Dong J, 2020      | ●                   | ●                       | ●                             | ●                           | ●                         | ●                                             | ●                    |
| 58       | Dreher M, 2020    | ●                   | ●                       | ●                             | ●                           | ●                         | ●                                             | ●                    |
| 59       | Du RH, 2020       | ●                   | ●                       | ●                             | ●                           | ●                         | ●                                             | ●                    |
| 60       | Duan Q, 2020      | ●                   | ●                       | ●                             | ●                           | ●                         | ●                                             | ●                    |
| 61       | Fan J, 2020       | ●                   | ●                       | ●                             | ●                           | ●                         | ●                                             | ●                    |
| 62       | Fan T, 2020       | ●                   | ●                       | ●                             | ●                           | ●                         | ●                                             | ●                    |
| 63       | Fang L, 2020      | ●                   | ●                       | ●                             | ●                           | ●                         | ●                                             | ●                    |
| 64       | Fei J, 2020       | ●                   | ●                       | ●                             | ●                           | ●                         | ●                                             | ●                    |

● = High risk of bias, ● = Moderate risk of bias, ● = Low risk of bias

| Ref. nr. | Author                     | Study participation | Study Attrition Summary | Prognostic Factor Measurement | Outcome Measurement Summary | Study Confounding Summary | Statistical Analysis and Presentation Summary | Overall risk of bias |
|----------|----------------------------|---------------------|-------------------------|-------------------------------|-----------------------------|---------------------------|-----------------------------------------------|----------------------|
| 65       | Feng Y, 2020               | ●                   | ●                       | ●                             | ●                           | ●                         | ●                                             | ●                    |
| 66       | Feng Z, 2020               | ●                   | ●                       | ●                             | ●                           | ●                         | ●                                             | ●                    |
| 67       | Fu L, Fei J, Xiang H, 2020 | ●                   | ●                       | ●                             | ●                           | ●                         | ●                                             | ●                    |
| 68       | Fu L, Fei J, Xu S, 2020    | ●                   | ●                       | ●                             | ●                           | ●                         | ●                                             | ●                    |
| 69       | Gao L, 2020                | ●                   | ●                       | ●                             | ●                           | ●                         | ●                                             | ●                    |
| 70       | Gao Y, 2020                | ●                   | ●                       | ●                             | ●                           | ●                         | ●                                             | ●                    |
| 27       | Gong J, 2020               | ●                   | ●                       | ●                             | ●                           | ●                         | ●                                             | ●                    |
| 71       | Grasselli G, 2020          | ●                   | ●                       | ●                             | ●                           | ●                         | ●                                             | ●                    |
| 72       | Gu T, 2020                 | ●                   | ●                       | ●                             | ●                           | ●                         | ●                                             | ●                    |
| 73       | Guan W, Liang W, 2020      | ●                   | ●                       | ●                             | ●                           | ●                         | ●                                             | ●                    |

● = High risk of bias, ● = Moderate risk of bias, ● = Low risk of bias

| Ref. nr. | Author             | Study participation | Study Attrition Summary | Prognostic Factor Measurement | Outcome Measurement Summary | Study Confounding Summary | Statistical Analysis and Presentation Summary | Overall risk of bias |
|----------|--------------------|---------------------|-------------------------|-------------------------------|-----------------------------|---------------------------|-----------------------------------------------|----------------------|
| 74       | Guan W, Ni Z, 2020 | ●                   | ●                       | ●                             | ●                           | ●                         | ●                                             | ●                    |
| 75       | Guo T, 2020        | ●                   | ●                       | ●                             | ●                           | ●                         | ●                                             | ●                    |
| 76       | Guo TM, 2020       | ●                   | ●                       | ●                             | ●                           | ●                         | ●                                             | ●                    |
| 77       | Guo W, 2020        | ●                   | ●                       | ●                             | ●                           | ●                         | ●                                             | ●                    |
| 78       | Han H, 2020        | ●                   | ●                       | ●                             | ●                           | ●                         | ●                                             | ●                    |
| 79       | Han M, 2020        | ●                   | ●                       | ●                             | ●                           | ●                         | ●                                             | ●                    |
| 80       | Han Y, 2020        | ●                   | ●                       | ●                             | ●                           | ●                         | ●                                             | ●                    |
| 81       | He W, 2020         | ●                   | ●                       | ●                             | ●                           | ●                         | ●                                             | ●                    |
| 82       | He XW, 2020        | ●                   | ●                       | ●                             | ●                           | ●                         | ●                                             | ●                    |
| 83       | Herold T, 2020     | ●                   | ●                       | ●                             | ●                           | ●                         | ●                                             | ●                    |

● = High risk of bias, ● = Moderate risk of bias, ● = Low risk of bias

| Ref. nr. | Author        | Study participation | Study Attrition Summary | Prognostic Factor Measurement | Outcome Measurement Summary | Study Confounding Summary | Statistical Analysis and Presentation Summary | Overall risk of bias |
|----------|---------------|---------------------|-------------------------|-------------------------------|-----------------------------|---------------------------|-----------------------------------------------|----------------------|
| 84       | Hu B, 2020    | ●                   | ●                       | ●                             | ●                           | ●                         | ●                                             | ●                    |
| 85       | Hu L, 2020    | ●                   | ●                       | ●                             | ●                           | ●                         | ●                                             | ●                    |
| 86       | Hu X, 2020    | ●                   | ●                       | ●                             | ●                           | ●                         | ●                                             | ●                    |
| 87       | Hu Z, 2020    | ●                   | ●                       | ●                             | ●                           | ●                         | ●                                             | ●                    |
| 88       | Huang C, 2020 | ●                   | ●                       | ●                             | ●                           | ●                         | ●                                             | ●                    |
| 89       | Huang H, 2020 | ●                   | ●                       | ●                             | ●                           | ●                         | ●                                             | ●                    |
| 90       | Huang M, 2020 | ●                   | ●                       | ●                             | ●                           | ●                         | ●                                             | ●                    |
| 91       | Jiang X, 2020 | ●                   | ●                       | ●                             | ●                           | ●                         | ●                                             | ●                    |
| 92       | Jin JM, 2020  | ●                   | ●                       | ●                             | ●                           | ●                         | ●                                             | ●                    |
| 93       | Jin X, 2020   | ●                   | ●                       | ●                             | ●                           | ●                         | ●                                             | ●                    |

● = High risk of bias, ● = Moderate risk of bias, ● = Low risk of bias

| Ref. nr. | Author             | Study participation | Study Attrition Summary | Prognostic Factor Measurement | Outcome Measurement Summary | Study Confounding Summary | Statistical Analysis and Presentation Summary | Overall risk of bias |
|----------|--------------------|---------------------|-------------------------|-------------------------------|-----------------------------|---------------------------|-----------------------------------------------|----------------------|
| 94       | Kalligeros M, 2020 | ●                   | ●                       | ●                             | ●                           | ●                         | ●                                             | ●                    |
| 95       | Kuang Y, 2020      | ●                   | ●                       | ●                             | ●                           | ●                         | ●                                             | ●                    |
| 96       | Lee H, 2020        | ●                   | ●                       | ●                             | ●                           | ●                         | ●                                             | ●                    |
| 97       | Lei L, 2020        | ●                   | ●                       | ●                             | ●                           | ●                         | ●                                             | ●                    |
| 98       | Lei S, 2020        | ●                   | ●                       | ●                             | ●                           | ●                         | ●                                             | ●                    |
| 99       | Li H. 2020         | ●                   | ●                       | ●                             | ●                           | ●                         | ●                                             | ●                    |
| 100      | Li J, Long X, 2020 | ●                   | ●                       | ●                             | ●                           | ●                         | ●                                             | ●                    |
| 101      | Li J, Meng L, 2020 | ●                   | ●                       | ●                             | ●                           | ●                         | ●                                             | ●                    |
| 102      | Li J, Wang X, 2020 | ●                   | ●                       | ●                             | ●                           | ●                         | ●                                             | ●                    |
| 103      | Li K, 2020         | ●                   | ●                       | ●                             | ●                           | ●                         | ●                                             | ●                    |

● = High risk of bias, ● = Moderate risk of bias, ● = Low risk of bias



| Ref. nr. | Author             | Study participation | Study Attrition Summary | Prognostic Factor Measurement | Outcome Measurement Summary | Study Confounding Summary | Statistical Analysis and Presentation Summary | Overall risk of bias |
|----------|--------------------|---------------------|-------------------------|-------------------------------|-----------------------------|---------------------------|-----------------------------------------------|----------------------|
| 25       | Li X, 2020         | ●                   | ●                       | ●                             | ●                           | ●                         | ●                                             | ●                    |
| 104      | Li Y, 2020         | ●                   | ●                       | ●                             | ●                           | ●                         | ●                                             | ●                    |
| 105      | Li YK, 2020        | ●                   | ●                       | ●                             | ●                           | ●                         | ●                                             | ●                    |
| 106      | Lian J, 2020       | ●                   | ●                       | ●                             | ●                           | ●                         | ●                                             | ●                    |
| 107      | Liang W, 2020      | ●                   | ●                       | ●                             | ●                           | ●                         | ●                                             | ●                    |
| 108      | Liao X, 2020       | ●                   | ●                       | ●                             | ●                           | ●                         | ●                                             | ●                    |
| 109      | Liu F, 2020        | ●                   | ●                       | ●                             | ●                           | ●                         | ●                                             | ●                    |
| 110      | Liu J, 2020        | ●                   | ●                       | ●                             | ●                           | ●                         | ●                                             | ●                    |
| 111      | Liu J, Li S, 2020  | ●                   | ●                       | ●                             | ●                           | ●                         | ●                                             | ●                    |
| 112      | Liu J, Liu Y, 2020 | ●                   | ●                       | ●                             | ●                           | ●                         | ●                                             | ●                    |

● = High risk of bias, ● = Moderate risk of bias, ● = Low risk of bias

| Ref. nr. | Author                    | Study participation | Study Attrition Summary | Prognostic Factor Measurement | Outcome Measurement Summary | Study Confounding Summary | Statistical Analysis and Presentation Summary | Overall risk of bias |
|----------|---------------------------|---------------------|-------------------------|-------------------------------|-----------------------------|---------------------------|-----------------------------------------------|----------------------|
| 113      | Liu KC, 2020              | ●                   | ●                       | ●                             | ●                           | ●                         | ●                                             | ●                    |
| 114      | Liu R, 2020               | ●                   | ●                       | ●                             | ●                           | ●                         | ●                                             | ●                    |
| 115      | Liu T, 2020               | ●                   | ●                       | ●                             | ●                           | ●                         | ●                                             | ●                    |
| 116      | Liu W, 2020               | ●                   | ●                       | ●                             | ●                           | ●                         | ●                                             | ●                    |
| 117      | Liu Y, 2020               | ●                   | ●                       | ●                             | ●                           | ●                         | ●                                             | ●                    |
| 118      | Liu Y, Bi L, 2020         | ●                   | ●                       | ●                             | ●                           | ●                         | ●                                             | ●                    |
| 119      | Liu Y, Du X, 2020         | ●                   | ●                       | ●                             | ●                           | ●                         | ●                                             | ●                    |
| 120      | Liu Y, Sun W, Guo Y, 2020 | ●                   | ●                       | ●                             | ●                           | ●                         | ●                                             | ●                    |
| 121      | Liu Y, Sun W, Li J, 2020  | ●                   | ●                       | ●                             | ●                           | ●                         | ●                                             | ●                    |
| 122      | Liu Y, Yang Y, 2020       | ●                   | ●                       | ●                             | ●                           | ●                         | ●                                             | ●                    |

● = High risk of bias, ● = Moderate risk of bias, ● = Low risk of bias

| Ref. nr. | Author         | Study participation | Study Attrition Summary | Prognostic Factor Measurement | Outcome Measurement Summary | Study Confounding Summary | Statistical Analysis and Presentation Summary | Overall risk of bias |
|----------|----------------|---------------------|-------------------------|-------------------------------|-----------------------------|---------------------------|-----------------------------------------------|----------------------|
| 123      | Lu J, 2020     | ●                   | ●                       | ●                             | ●                           | ●                         | ●                                             | ●                    |
| 124      | Luo XM, 2020   | ●                   | ●                       | ●                             | ●                           | ●                         | ●                                             | ●                    |
| 125      | Luo XM, 2020   | ●                   | ●                       | ●                             | ●                           | ●                         | ●                                             | ●                    |
| 126      | Lv X, 2020     | ●                   | ●                       | ●                             | ●                           | ●                         | ●                                             | ●                    |
| 127      | Ma J, 2020     | ●                   | ●                       | ●                             | ●                           | ●                         | ●                                             | ●                    |
| 128      | Ma K, 2020     | ●                   | ●                       | ●                             | ●                           | ●                         | ●                                             | ●                    |
| 129      | Ma Y, 2020     | ●                   | ●                       | ●                             | ●                           | ●                         | ●                                             | ●                    |
| 130      | Mehra MR, 2020 | ●                   | ●                       | ●                             | ●                           | ●                         | ●                                             | ●                    |
| 131      | Mo P, 2020     | ●                   | ●                       | ●                             | ●                           | ●                         | ●                                             | ●                    |
| 132      | Niu S, 2020    | ●                   | ●                       | ●                             | ●                           | ●                         | ●                                             | ●                    |

● = High risk of bias, ● = Moderate risk of bias, ● = Low risk of bias

| Ref. nr. | Author           | Study participation | Study Attrition Summary | Prognostic Factor Measurement | Outcome Measurement Summary | Study Confounding Summary | Statistical Analysis and Presentation Summary | Overall risk of bias |
|----------|------------------|---------------------|-------------------------|-------------------------------|-----------------------------|---------------------------|-----------------------------------------------|----------------------|
| 133      | Pan L, 2020      | ●                   | ●                       | ●                             | ●                           | ●                         | ●                                             | ●                    |
| 134      | Paranjpe I, 2020 | ●                   | ●                       | ●                             | ●                           | ●                         | ●                                             | ●                    |
| 135      | Peng YD, 2020    | ●                   | ●                       | ●                             | ●                           | ●                         | ●                                             | ●                    |
| 136      | Qi D, 2020       | ●                   | ●                       | ●                             | ●                           | ●                         | ●                                             | ●                    |
| 137      | Qi X, 2020       | ●                   | ●                       | ●                             | ●                           | ●                         | ●                                             | ●                    |
| 138      | Qin X, 2020      | ●                   | ●                       | ●                             | ●                           | ●                         | ●                                             | ●                    |
| 139      | Qu R, 2020       | ●                   | ●                       | ●                             | ●                           | ●                         | ●                                             | ●                    |
| 140      | Ran J, 2020      | ●                   | ●                       | ●                             | ●                           | ●                         | ●                                             | ●                    |
| 141      | Rentsch CT, 2020 | ●                   | ●                       | ●                             | ●                           | ●                         | ●                                             | ●                    |
| 142      | Rossi PG, 2020   | ●                   | ●                       | ●                             | ●                           | ●                         | ●                                             | ●                    |

● = High risk of bias, ● = Moderate risk of bias, ● = Low risk of bias

| Ref. nr. | Author        | Study participation | Study Attrition Summary | Prognostic Factor Measurement | Outcome Measurement Summary | Study Confounding Summary | Statistical Analysis and Presentation Summary | Overall risk of bias |
|----------|---------------|---------------------|-------------------------|-------------------------------|-----------------------------|---------------------------|-----------------------------------------------|----------------------|
| 143      | Ruan Q, 2020  | ●                   | ●                       | ●                             | ●                           | ●                         | ●                                             | ●                    |
| 144      | Sakar J, 2020 | ●                   | ●                       | ●                             | ●                           | ●                         | ●                                             | ●                    |
| 145      | Shi H, 2020   | ●                   | ●                       | ●                             | ●                           | ●                         | ●                                             | ●                    |
| 146      | Shi S, 2020   | ●                   | ●                       | ●                             | ●                           | ●                         | ●                                             | ●                    |
| 147      | Shi W, 2020   | ●                   | ●                       | ●                             | ●                           | ●                         | ●                                             | ●                    |
| 148      | Shi Y, 2020   | ●                   | ●                       | ●                             | ●                           | ●                         | ●                                             | ●                    |
| 149      | Song C, 2020  | ●                   | ●                       | ●                             | ●                           | ●                         | ●                                             | ●                    |
| 150      | Sun F, 2020   | ●                   | ●                       | ●                             | ●                           | ●                         | ●                                             | ●                    |
| 151      | Sun X, 2020   | ●                   | ●                       | ●                             | ●                           | ●                         | ●                                             | ●                    |
| 152      | Sun Y, 2020   | ●                   | ●                       | ●                             | ●                           | ●                         | ●                                             | ●                    |

● = High risk of bias, ● = Moderate risk of bias, ● = Low risk of bias

| Ref. nr. | Author              | Study participation | Study Attrition Summary | Prognostic Factor Measurement | Outcome Measurement Summary | Study Confounding Summary | Statistical Analysis and Presentation Summary | Overall risk of bias |
|----------|---------------------|---------------------|-------------------------|-------------------------------|-----------------------------|---------------------------|-----------------------------------------------|----------------------|
| 153      | Tabata S, 2020      | ●                   | ●                       | ●                             | ●                           | ●                         | ●                                             | ●                    |
| 154      | Tan L, 2020         | ●                   | ●                       | ●                             | ●                           | ●                         | ●                                             | ●                    |
| 155      | Tang N, 2020        | ●                   | ●                       | ●                             | ●                           | ●                         | ●                                             | ●                    |
| 156      | Tian S, 2020        | ●                   | ●                       | ●                             | ●                           | ●                         | ●                                             | ●                    |
| 157      | Tu WJ, 2020         | ●                   | ●                       | ●                             | ●                           | ●                         | ●                                             | ●                    |
| 158      | Wan S, 2020         | ●                   | ●                       | ●                             | ●                           | ●                         | ●                                             | ●                    |
| 159      | Wang D, Hu B, 2020  | ●                   | ●                       | ●                             | ●                           | ●                         | ●                                             | ●                    |
| 160      | Wang D, Yin Y, 2020 | ●                   | ●                       | ●                             | ●                           | ●                         | ●                                             | ●                    |
| 161      | Wang G, 2020        | ●                   | ●                       | ●                             | ●                           | ●                         | ●                                             | ●                    |
| 162      | Wang L, 2020        | ●                   | ●                       | ●                             | ●                           | ●                         | ●                                             | ●                    |

● = High risk of bias, ● = Moderate risk of bias, ● = Low risk of bias

| Ref. nr. | Author               | Study participation | Study Attrition Summary | Prognostic Factor Measurement | Outcome Measurement Summary | Study Confounding Summary | Statistical Analysis and Presentation Summary | Overall risk of bias |
|----------|----------------------|---------------------|-------------------------|-------------------------------|-----------------------------|---------------------------|-----------------------------------------------|----------------------|
| 163      | Wang L, 2020 (2)     | ●                   | ●                       | ●                             | ●                           | ●                         | ●                                             | ●                    |
| 164      | Wang L, Li X, 2020   | ●                   | ●                       | ●                             | ●                           | ●                         | ●                                             | ●                    |
| 165      | Wang L, Zou A, 2020  | ●                   | ●                       | ●                             | ●                           | ●                         | ●                                             | ●                    |
| 166      | Wang R, 2020         | ●                   | ●                       | ●                             | ●                           | ●                         | ●                                             | ●                    |
| 167      | Wang X, 2020         | ●                   | ●                       | ●                             | ●                           | ●                         | ●                                             | ●                    |
| 168      | Wang Y, 2020         | ●                   | ●                       | ●                             | ●                           | ●                         | ●                                             | ●                    |
| 169      | Wang Y, Lu X, 2020   | ●                   | ●                       | ●                             | ●                           | ●                         | ●                                             | ●                    |
| 170      | Wang Y, Zhou Y, 2020 | ●                   | ●                       | ●                             | ●                           | ●                         | ●                                             | ●                    |
| 171      | Wang Z, 2020         | ●                   | ●                       | ●                             | ●                           | ●                         | ●                                             | ●                    |
| 172      | Wen C, 2020          | ●                   | ●                       | ●                             | ●                           | ●                         | ●                                             | ●                    |

● = High risk of bias, ● = Moderate risk of bias, ● = Low risk of bias

| Ref. nr. | Author                    | Study participation | Study Attrition Summary | Prognostic Factor Measurement | Outcome Measurement Summary | Study Confounding Summary | Statistical Analysis and Presentation Summary | Overall risk of bias |
|----------|---------------------------|---------------------|-------------------------|-------------------------------|-----------------------------|---------------------------|-----------------------------------------------|----------------------|
| 173      | Wen Y, 2020               | ●                   | ●                       | ●                             | ●                           | ●                         | ●                                             | ●                    |
| 174      | Whang S, 2020             | ●                   | ●                       | ●                             | ●                           | ●                         | ●                                             | ●                    |
| 175      | Wu C, 2020                | ●                   | ●                       | ●                             | ●                           | ●                         | ●                                             | ●                    |
| 176      | Wu J, 2020                | ●                   | ●                       | ●                             | ●                           | ●                         | ●                                             | ●                    |
| 177      | Xie H, 2020               | ●                   | ●                       | ●                             | ●                           | ●                         | ●                                             | ●                    |
| 178      | Xie J, Covassin N, 2020   | ●                   | ●                       | ●                             | ●                           | ●                         | ●                                             | ●                    |
| 179      | Xie J, Hungerford D, 2020 | ●                   | ●                       | ●                             | ●                           | ●                         | ●                                             | ●                    |
| 180      | Xu S, 2020                | ●                   | ●                       | ●                             | ●                           | ●                         | ●                                             | ●                    |
| 181      | Xu W, 2020                | ●                   | ●                       | ●                             | ●                           | ●                         | ●                                             | ●                    |
| 182      | Xu Y, 2020                | ●                   | ●                       | ●                             | ●                           | ●                         | ●                                             | ●                    |

● = High risk of bias, ● = Moderate risk of bias, ● = Low risk of bias



| Ref. nr. | Author               | Study participation                                                                 | Study Attrition Summary                                                             | Prognostic Factor Measurement                                                         | Outcome Measurement Summary                                                           | Study Confounding Summary                                                             | Statistical Analysis and Presentation Summary                                         | Overall risk of bias                                                                  |
|----------|----------------------|-------------------------------------------------------------------------------------|-------------------------------------------------------------------------------------|---------------------------------------------------------------------------------------|---------------------------------------------------------------------------------------|---------------------------------------------------------------------------------------|---------------------------------------------------------------------------------------|---------------------------------------------------------------------------------------|
| 183      | Xu YH, 2020          |    |    |    |    |    |    |    |
| 184      | Yan S, 2020          |    |    |    |    |    |    |    |
| 185      | Yan X, 2020          |    |    |    |    |    |    |    |
| 186      | Yang A, 2020         |    |    |    |    |    |    |    |
| 187      | Yang G, 2020         |    |    |    |    |    |    |    |
| 188      | Yang J, 2020         |    |    |    |    |    |    |    |
| 189      | Yang L, 2020         |  |  |  |  |  |  |  |
| 190      | Yang X, Yang Q, 2020 |  |  |  |  |  |  |  |
| 191      | Yang X, Yu Y, 2020   |  |  |  |  |  |  |  |
| 192      | Yin Y, 2020          |  |  |  |  |  |  |  |

 = High risk of bias,  = Moderate risk of bias,  = Low risk of bias

| Ref. nr. | Author                 | Study participation | Study Attrition Summary | Prognostic Factor Measurement | Outcome Measurement Summary | Study Confounding Summary | Statistical Analysis and Presentation Summary | Overall risk of bias |
|----------|------------------------|---------------------|-------------------------|-------------------------------|-----------------------------|---------------------------|-----------------------------------------------|----------------------|
| 193      | Young B E, 2020        | ●                   | ●                       | ●                             | ●                           | ●                         | ●                                             | ●                    |
| 194      | Yu C, 2020             | ●                   | ●                       | ●                             | ●                           | ●                         | ●                                             | ●                    |
| 195      | Yu M, 2020             | ●                   | ●                       | ●                             | ●                           | ●                         | ●                                             | ●                    |
| 196      | Yu T, 2020             | ●                   | ●                       | ●                             | ●                           | ●                         | ●                                             | ●                    |
| 197      | Yuan M, 2020           | ●                   | ●                       | ●                             | ●                           | ●                         | ●                                             | ●                    |
| 198      | Zang L, 2020           | ●                   | ●                       | ●                             | ●                           | ●                         | ●                                             | ●                    |
| 199      | Zeng L, 2020           | ●                   | ●                       | ●                             | ●                           | ●                         | ●                                             | ●                    |
| 200      | Zeng Z, 2020           | ●                   | ●                       | ●                             | ●                           | ●                         | ●                                             | ●                    |
| 201      | Zhang F, 2020          | ●                   | ●                       | ●                             | ●                           | ●                         | ●                                             | ●                    |
| 202      | Zhang G, Chang H, 2020 | ●                   | ●                       | ●                             | ●                           | ●                         | ●                                             | ●                    |

● = High risk of bias, ● = Moderate risk of bias, ● = Low risk of bias

| Ref. nr. | Author                   | Study participation                                                                 | Study Attrition Summary                                                             | Prognostic Factor Measurement                                                         | Outcome Measurement Summary                                                           | Study Confounding Summary                                                             | Statistical Analysis and Presentation Summary                                         | Overall risk of bias                                                                  |
|----------|--------------------------|-------------------------------------------------------------------------------------|-------------------------------------------------------------------------------------|---------------------------------------------------------------------------------------|---------------------------------------------------------------------------------------|---------------------------------------------------------------------------------------|---------------------------------------------------------------------------------------|---------------------------------------------------------------------------------------|
| 203      | Zhang G, Zhang J, 2020   |    |    |    |    |    |    |    |
| 204      | Zhang H, 2020            |    |    |    |    |    |    |    |
| 205      | Zhang HY 2020            |    |    |    |    |    |    |    |
| 206      | Zhang J, 2020            |    |    |    |    |    |    |    |
| 207      | Zhang JJ, 2020           |    |    |    |    |    |    |    |
| 208      | Zhang L, Tao B, 2020     |    |    |    |    |    |    |    |
| 209      | Zhang L, Tao B, 2020 (2) |  |  |  |  |  |  |  |
| 210      | Zhang L, Wenwu S, 2020   |  |  |  |  |  |  |  |
| 211      | Zhang L, Zhu F, 2020     |  |  |  |  |  |  |  |
| 212      | Zhang P, 2020            |  |  |  |  |  |  |  |

 = High risk of bias,  = Moderate risk of bias,  = Low risk of bias

| Ref. nr. | Author                 | Study participation | Study Attrition Summary | Prognostic Factor Measurement | Outcome Measurement Summary | Study Confounding Summary | Statistical Analysis and Presentation Summary | Overall risk of bias |
|----------|------------------------|---------------------|-------------------------|-------------------------------|-----------------------------|---------------------------|-----------------------------------------------|----------------------|
| 213      | Zhang R, 2020          | ●                   | ●                       | ●                             | ●                           | ●                         | ●                                             | ●                    |
| 214      | Zhang S, 2020          | ●                   | ●                       | ●                             | ●                           | ●                         | ●                                             | ●                    |
| 215      | Zhang S, Zhao J, 2020  | ●                   | ●                       | ●                             | ●                           | ●                         | ●                                             | ●                    |
| 216      | Zhang X, Guo W, 2020   | ●                   | ●                       | ●                             | ●                           | ●                         | ●                                             | ●                    |
| 217      | Zhang X, Huan C , 2020 | ●                   | ●                       | ●                             | ●                           | ●                         | ●                                             | ●                    |
| 218      | Zhang Y, 2020          | ●                   | ●                       | ●                             | ●                           | ●                         | ●                                             | ●                    |
| 219      | Zhao W, 2020           | ●                   | ●                       | ●                             | ●                           | ●                         | ●                                             | ●                    |
| 220      | Zhao W, 2020           | ●                   | ●                       | ●                             | ●                           | ●                         | ●                                             | ●                    |
| 221      | Zhen L, 2020           | ●                   | ●                       | ●                             | ●                           | ●                         | ●                                             | ●                    |
| 222      | Zheng F, 2020          | ●                   | ●                       | ●                             | ●                           | ●                         | ●                                             | ●                    |

● = High risk of bias, ● = Moderate risk of bias, ● = Low risk of bias

| Ref. nr. | Author                 | Study participation | Study Attrition Summary | Prognostic Factor Measurement | Outcome Measurement Summary | Study Confounding Summary | Statistical Analysis and Presentation Summary | Overall risk of bias |
|----------|------------------------|---------------------|-------------------------|-------------------------------|-----------------------------|---------------------------|-----------------------------------------------|----------------------|
| 223      | Zheng X, 2020          | ●                   | ●                       | ●                             | ●                           | ●                         | ●                                             | ●                    |
| 224      | Zhou B, 2020           | ●                   | ●                       | ●                             | ●                           | ●                         | ●                                             | ●                    |
| 225      | Zhou F, 2020           | ●                   | ●                       | ●                             | ●                           | ●                         | ●                                             | ●                    |
| 226      | Zhou H, 2020           | ●                   | ●                       | ●                             | ●                           | ●                         | ●                                             | ●                    |
| 227      | Zhou H, Wanxin C, 2020 | ●                   | ●                       | ●                             | ●                           | ●                         | ●                                             | ●                    |
| 228      | Zhou M, 2020           | ●                   | ●                       | ●                             | ●                           | ●                         | ●                                             | ●                    |
| 229      | Zhou Y, 2020           | ●                   | ●                       | ●                             | ●                           | ●                         | ●                                             | ●                    |
| 230      | Zhu B, 2020            | ●                   | ●                       | ●                             | ●                           | ●                         | ●                                             | ●                    |
| 231      | Zhu Q, 2020            | ●                   | ●                       | ●                             | ●                           | ●                         | ●                                             | ●                    |

● = High risk of bias, ● = Moderate risk of bias, ● = Low risk of bias
